# Supplementary material for: Enantioselective synthesis of pyranonaphthoquinone antibiotics using a CBS reduction/cross-metathesis/oxa-Michael strategy
Source: Royal Society of Chemistry journal article supplement (doi:10.1039/c1ob05595j), 2011-01-01
Supplement: c1ob05595j.pdf [file c1ob05595j.pdf]

## Supporting Information

# Enantioselective Synthesis of Pyranonaphthoquinone Antibiotics using a CBS Reduction/ Cross-metathesis/ oxa-Michael Strategy<sup>†</sup>

**Paul A. Hume, Jonathan Sperry, Margaret A. Brimble\***

Department of Chemistry, University of Auckland, 23 Symonds Street, Auckland 1142, New Zealand

Fax +64(9)3737422; E-mail: m.brimble@auckland.ac.nz

|                                                                                                                                |   |
|--------------------------------------------------------------------------------------------------------------------------------|---|
| Syntheses.....                                                                                                                 | 2 |
| <sup>1</sup> H and <sup>13</sup> C NMR spectra, <sup>1</sup> H- <sup>1</sup> H NOESY NMR experiments and chiral HPLC data..... | 5 |

**(±)-2-(1-(*tert*-Butyldimethylsilyloxy)ethyl)-1,4-dimethoxynaphthalene (11b).** To a solution of alcohol **11a** (1.14 g, 4.9 mmol) in dry DMF (15 mL) was added TBDMSCl (1.11 g, 7.3 mmol), imidazole (0.67 g, 9.8 mmol), and DMAP (0.12 g, 0.98 mmol). The reaction mixture was stirred under nitrogen at room temperature for 24 hours. The solution was quenched by the addition of sat. aq. NaHCO<sub>3</sub> (50 mL) and extracted with EtOAc (3 × 50 mL). The combined organic extracts were dried over MgSO<sub>4</sub> and concentrated *in vacuo*. Purification by column chromatography (hexanes-EtOAc 5:1) gave TBDMS ether **11b** (1.7 g, 100%) as a colourless solid: mp 53-57 °C; IR (film)  $\nu_{\max}/\text{cm}^{-1}$  3071, 2953, 2928, 2857, 1629, 1592, 1452, 1369, 1247, 1212, 1127, 1085, 999, 896, 828, 764; <sup>1</sup>H NMR (400 MHz, CDCl<sub>3</sub>):  $\delta$  8.28 (1 H, d, *J* = 7.7 Hz, 5-H or 8-H), 8.05 (1 H, d, *J* = 8.4 Hz, 5-H or 8-H), 7.57-7.46 (2 H, m, 6-H and 7-H), 7.07 (1 H, s, 3-H), 5.47 (1 H, q, *J* = 6.3 Hz, CHOSi), 4.03 (3 H, s, OCH<sub>3</sub>), 3.94 (3 H, s, OCH<sub>3</sub>), 1.53 (3 H, d, *J* = 6.3 Hz, CH<sub>3</sub>), 0.96 (9 H, s, <sup>t</sup>Bu), 0.14 (3 H, s, SiCH<sub>3</sub>), 0.01 (3 H, s, SiCH<sub>3</sub>); <sup>13</sup>C NMR (100 MHz, CDCl<sub>3</sub>):  $\delta$  152.1 (C-Ar), 144.3 (C-Ar), 134.9 (C-Ar), 128.2 (C-Ar), 126.4 (CH-Ar), 125.9 (C-Ar), 125.0 (CH-Ar), 122.4 (CH-Ar), 121.9 (CH-Ar), 101.8 (CH-Ar), 65.3 (CHOSi), 62.1 (OCH<sub>3</sub>), 55.6 (OCH<sub>3</sub>), 26.6 (CH<sub>3</sub>), 25.9 (3 × CH<sub>3</sub>), 18.3 (C(CH<sub>3</sub>)<sub>3</sub>), -4.8 (SiCH<sub>3</sub>), -4.8 (SiCH<sub>3</sub>); MS (ESI) *m/z* 369 ([M-Na]<sup>+</sup>, 12%), 299 (10), 215 (100), 186 (58); HRMS (ESI) *m/z* for C<sub>20</sub>H<sub>30</sub>NaO<sub>3</sub>Si<sup>+</sup> [M-Na]<sup>+</sup> calcd 369.1856, found 369.1844.

**(±)-2-(1-(*tert*-Butyldimethylsilyloxy)ethyl)-1,4-naphthoquinone (9b).** To a stirred solution of TBDMS ether **11b** (0.2 g, 0.6 mmol) in acetonitrile (5 mL) was added a solution of CAN (0.63 g, 1.2 mmol) in water (1 mL). The solution was stirred at room temperature for 5 minutes and then diluted with water (30 mL). The reaction mixture was extracted with EtOAc (3 × 30 mL). The combined organic extracts were washed with sat. aq. NaHCO<sub>3</sub> (30 mL), dried over MgSO<sub>4</sub> and concentrated *in vacuo*. Purification by column chromatography (hexanes-EtOAc 30:1) gave naphthoquinone **9b** (0.14 g, 75%) as a yellow oil: IR (film)  $\nu_{\max}/\text{cm}^{-1}$  2956, 2930, 2857, 1662, 1620, 1596, 1298, 1249, 1112, 893, 830, 776; <sup>1</sup>H NMR (400 MHz, CDCl<sub>3</sub>):  $\delta$  8.02-7.99 (2 H, m, 5-H and 8-H), 7.68-7.65 (2 H,

m, 6-H and 7-H), 7.05 (1 H, s, 3-H), 4.99 (1 H, q,  $J = 6.4$  Hz, CHOSi), 1.35 (3 H, d,  $J = 6.4$  Hz, CH<sub>3</sub>), 0.87 (9 H, s, <sup>t</sup>Bu), 0.06 (3 H, s, SiCH<sub>3</sub>), 0.01 (3 H, s, SiCH<sub>3</sub>); <sup>13</sup>C NMR (100 MHz, CDCl<sub>3</sub>): δ 185.3 (C=O), 184.7 (C=O), 155.0 (C-Ar), 133.7 (CH-Ar), 133.5 (CH-Ar), 132.9 (CH-Ar), 132.2 (C-Ar), 132.0 (C-Ar), 126.2 (CH-Ar), 126.0 (CH-Ar), 64.7 (CHOSi), 25.7 (3 × CH<sub>3</sub>), 24.8 (CH<sub>3</sub>), 18.1 (C(CH<sub>3</sub>)<sub>3</sub>), -5.0 (SiCH<sub>3</sub>), -5.1 (SiCH<sub>3</sub>); MS (ESI)  $m/z$  339 ([M-Na]<sup>+</sup>, 50%), 317 ([M-H]<sup>+</sup>, 58), 185 (100); HRMS (ESI)  $m/z$  for C<sub>18</sub>H<sub>25</sub>O<sub>3</sub>Si<sup>+</sup> [M-H]<sup>+</sup> calcd 317.1567, found 317.1567.

**(±)-2-(1-(Ethoxymethoxy)ethyl)-1,4-dimethoxynaphthalene (11c).** To a solution of alcohol **11a** (0.5 g, 2.2 mmol) and DIPEA (1.5 mL, 8.6 mmol) in CH<sub>2</sub>Cl<sub>2</sub> (21 mL) was added ethoxymethyl chloride (0.4 mL, 4.3 mmol) and DMAP (50 mg, 4.3 mmol). The solution was stirred under nitrogen at room temperature for 2 days. The solution was quenched with sat. aq. NH<sub>4</sub>Cl (50 mL). The layers were separated and the aqueous phase extracted with EtOAc (3 × 50 mL). The combined organic extracts were washed with brine (50 mL), dried over MgSO<sub>4</sub> and concentrated *in vacuo*. Purification by column chromatography (hexanes-EtOAc 5:1) gave EOM ether **11c** (0.56 g, 90%) as a colourless oil: IR (film)  $\nu_{\max}/\text{cm}^{-1}$  2975, 2934, 1596, 1459, 1365, 1213, 1088, 997, 846, 768; <sup>1</sup>H NMR (400 MHz, CDCl<sub>3</sub>): δ 8.31-8.29 (1 H, d,  $J = 8.4$  Hz, 5-H or 8-H), 8.09 (1 H, d,  $J = 7.8$  Hz, 5-H or 8-H), 7.57-7.47 (2 H, m, 6-H and 7-H), 6.92 (1 H, s, 3-H), 5.50 (1 H, q,  $J = 6.8$  Hz, CHOEOM), 4.73 (1 H, d,  $J = 6.6$  Hz, OCH<sub>2</sub>O), 4.66 (1 H, d,  $J = 6.6$  Hz, OCH<sub>2</sub>O), 4.01 (3 H, s, OCH<sub>3</sub>), 3.96 (3 H, s, OCH<sub>3</sub>), 3.83-3.74 (1 H, m, OCH<sub>2</sub>CH<sub>3</sub>), 3.61-3.53 (1 H, m, OCH<sub>2</sub>CH<sub>3</sub>), 1.60 (3 H, d,  $J = 6.8$  Hz, CH<sub>3</sub>), 1.23 (3 H, t,  $J = 7.2$  Hz, OCH<sub>2</sub>CH<sub>3</sub>); <sup>13</sup>C NMR (100 MHz, CDCl<sub>3</sub>): δ 152.2 (C-Ar), 146.4 (C-Ar), 130.9 (C-Ar), 128.2 (C-Ar), 126.4 (CH-Ar), 126.1 (C-Ar), 125.2 (CH-Ar), 122.2 (CH-Ar), 121.8 (CH-Ar), 101.0 (3-C), 92.6 (OCH<sub>2</sub>O), 67.3 (CHOEOM), 63.1 (OCH<sub>2</sub>CH<sub>3</sub>), 62.3 (OCH<sub>3</sub>), 55.4 (OCH<sub>3</sub>), 23.0 (CH<sub>3</sub>), 15.0 (OCH<sub>2</sub>CH<sub>3</sub>); MS (ESI)  $m/z$  313 ([M-Na]<sup>+</sup>, 35%), 215 (100), 186 (40); HRMS (ESI)  $m/z$  for C<sub>17</sub>H<sub>22</sub>NaO<sub>4</sub><sup>+</sup> [M-Na]<sup>+</sup> calcd 313.1410, found 313.1413.

(±)-2-(1-(Ethoxymethoxy)ethyl)-1,4-naphthoquinone (**9c**). To a stirred solution of EOM ether **11c** (0.48 g, 1.6 mmol) in acetonitrile (4.2 mL) was added a solution of CAN (1.8 g, 3.3 mmol) in water (4.2 mL). The solution was stirred at room temperature for 15 minutes then diluted with water (25 mL). The reaction mixture was extracted with EtOAc (3 × 25 mL). The combined organic extracts were washed with brine (25 mL), dried over MgSO<sub>4</sub> and concentrated *in vacuo*. Purification by column chromatography (hexanes-EtOAc 7:1) gave quinone **9c** (0.37 g, 86%) as a yellow oil: IR (film)  $\nu_{\max}/\text{cm}^{-1}$  2931, 2856, 1722, 1653, 1355, 1260, 1082, 1014, 969, 826; <sup>1</sup>H NMR (400 MHz, CDCl<sub>3</sub>):  $\delta$  8.04-7.99 (2 H, m, 5-H and 8-H), 7.74-7.70 (2 H, m, 6-H and 7-H), 7.03 (1 H, s, 3-H), 5.01 (1 H, q,  $J = 6.5$  Hz, CHO<sub>EOM</sub>), 4.79 (1 H, d,  $J = 6.9$  Hz, OCH<sub>2</sub>O), 4.71 (1 H, d,  $J = 6.9$  Hz, OCH<sub>2</sub>O), 3.73-3.55 (2 H, m, OCH<sub>2</sub>CH<sub>3</sub>), 1.46 (3 H, d,  $J = 6.5$  Hz, ArCHCH<sub>3</sub>), 1.19 (3 H, t,  $J = 7.1$  Hz, OCH<sub>2</sub>CH<sub>3</sub>); <sup>13</sup>C NMR (100 MHz, CDCl<sub>3</sub>):  $\delta$  184.6 (C=O), 184.0 (C=O), 152.1 (2-C), 133.3 (CH-Ar), 133.2 (CH-Ar), 132.6 (3-C), 131.8 (C-Ar), 131.5 (C-Ar), 125.9 (CH-Ar), 125.6 (CH-Ar), 93.3 (OCH<sub>2</sub>O), 67.9 (CHO<sub>EOM</sub>), 63.2 (OCH<sub>2</sub>CH<sub>3</sub>), 21.4 (CH<sub>3</sub>), 14.7 (OCH<sub>2</sub>CH<sub>3</sub>); MS (ESI)  $m/z$  283 ([M-Na]<sup>+</sup>, 100%), 185 (20); HRMS (ESI)  $m/z$  for C<sub>15</sub>H<sub>16</sub>NaO<sub>4</sub><sup>+</sup> [M-Na]<sup>+</sup> calcd. 283.0941, found 283.0935.

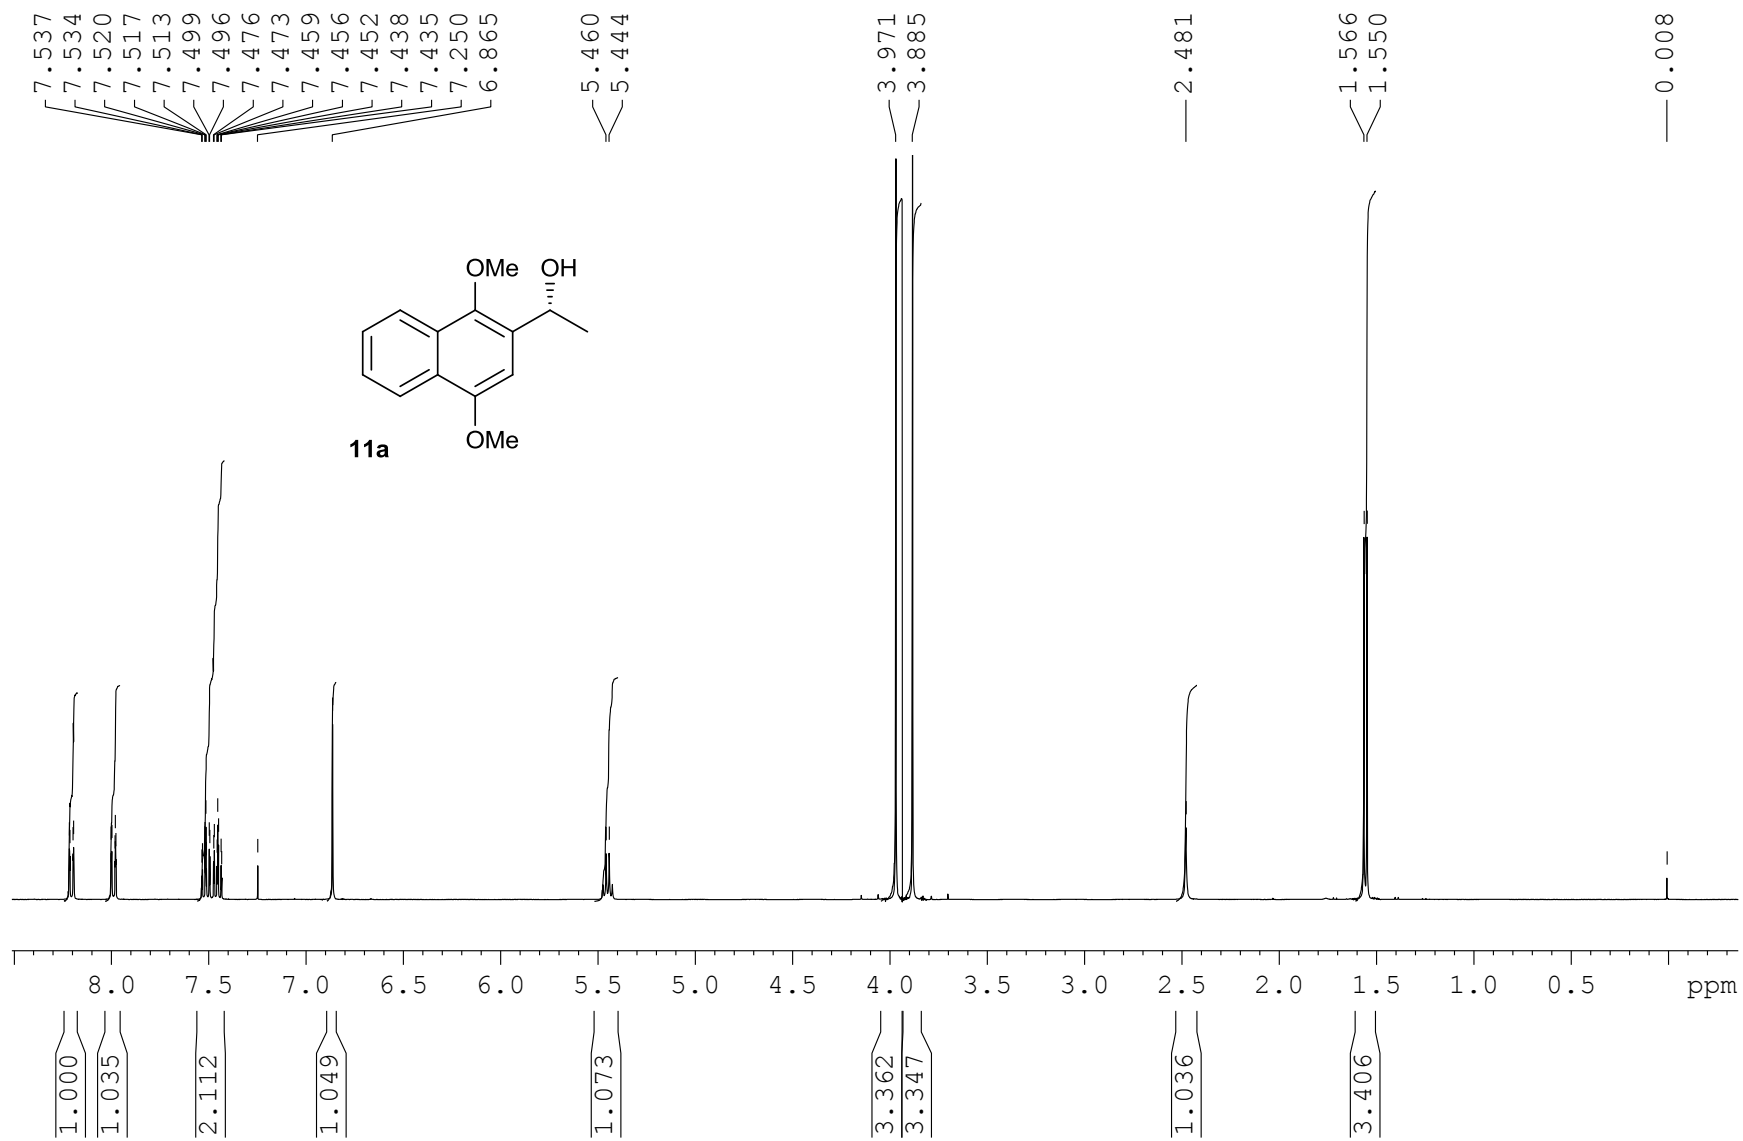

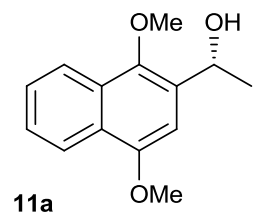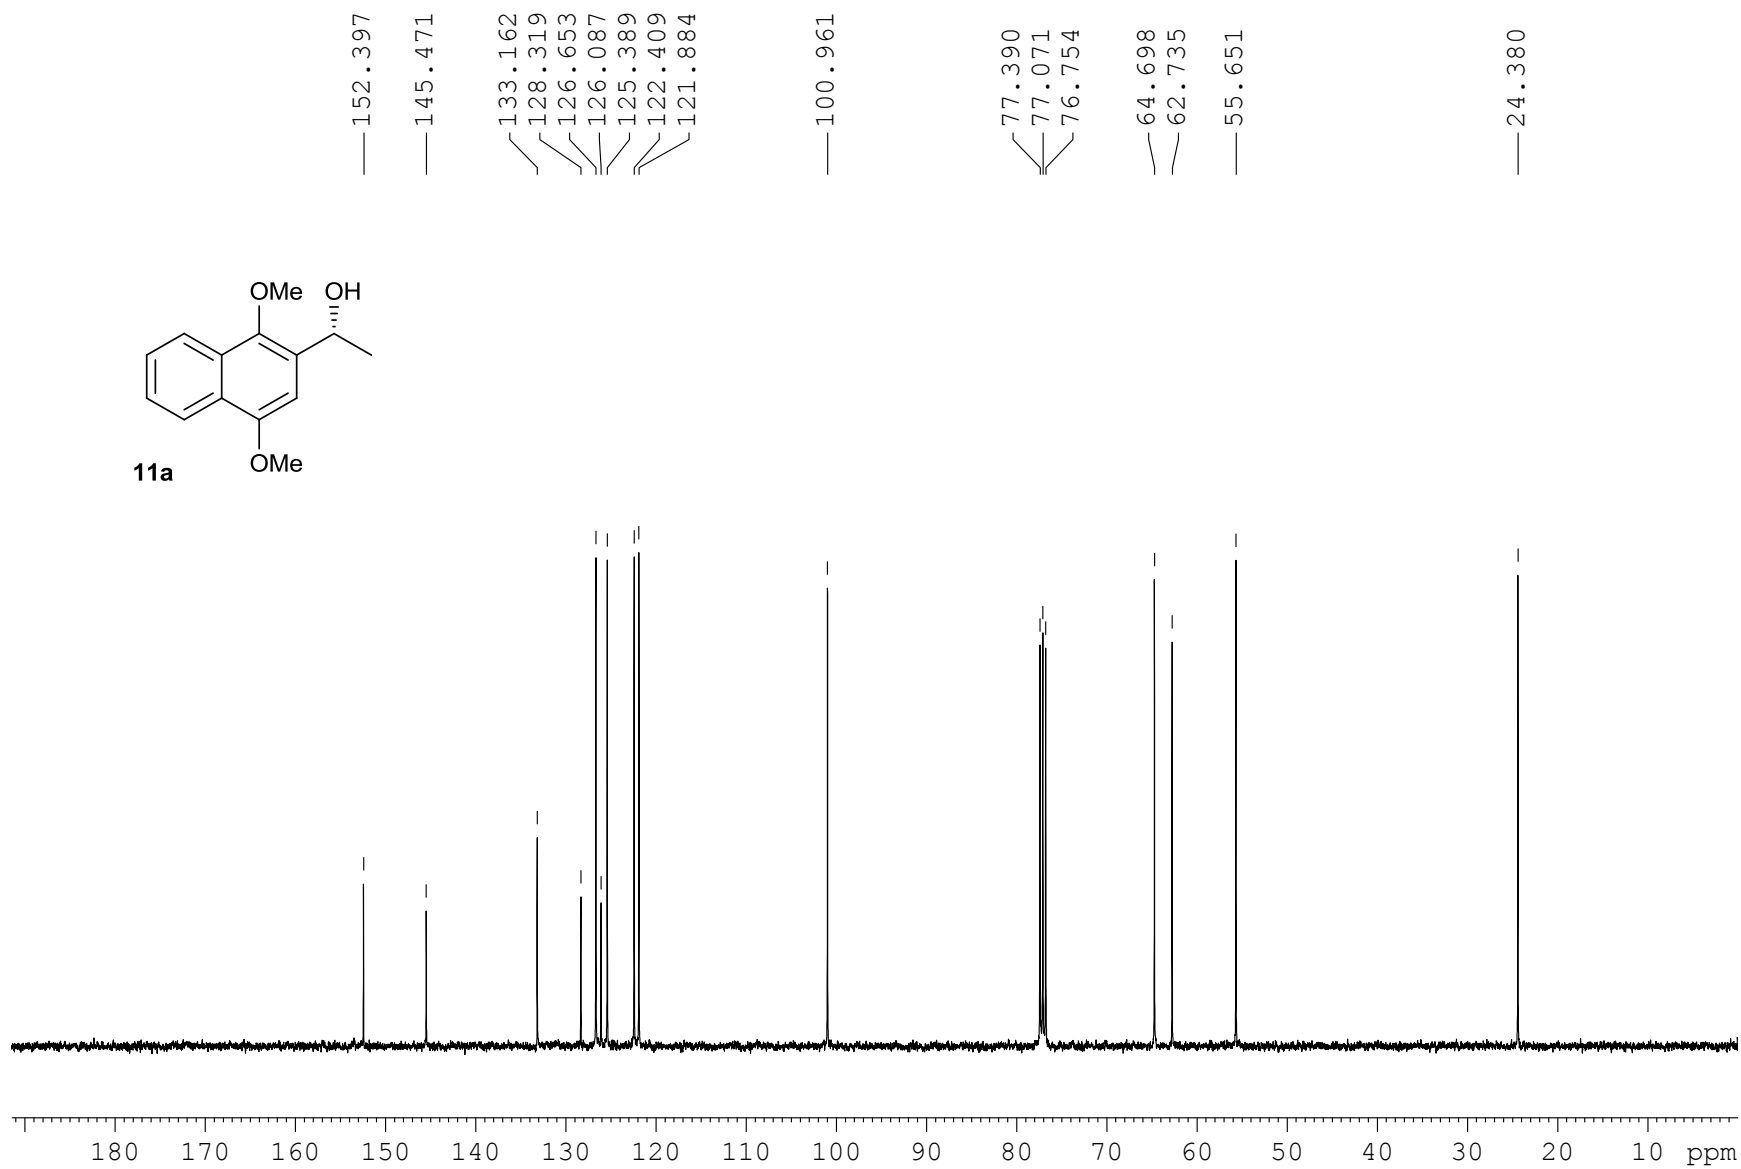

### 1 Racemic 65 35 IC

|                  |                  |                   |          |
|------------------|------------------|-------------------|----------|
| Sample Name:     | Racemic 65 35 IC | Injection Volume: | 20.0     |
| Vial Number:     | 2                | Channel:          | UV_VIS_2 |
| Sample Type:     | unknown          | Wavelength:       | 254      |
| Control Program: | ZEW085 65_35     | Bandwidth:        | n.a.     |
| Quantif. Method: | default          | Dilution Factor:  | 1.0000   |
| Recording Time:  | 2/12/2010 10:57  | Sample Weight:    | 1.0000   |
| Run Time (min):  | 38.50            | Sample Amount:    | 1.0000   |

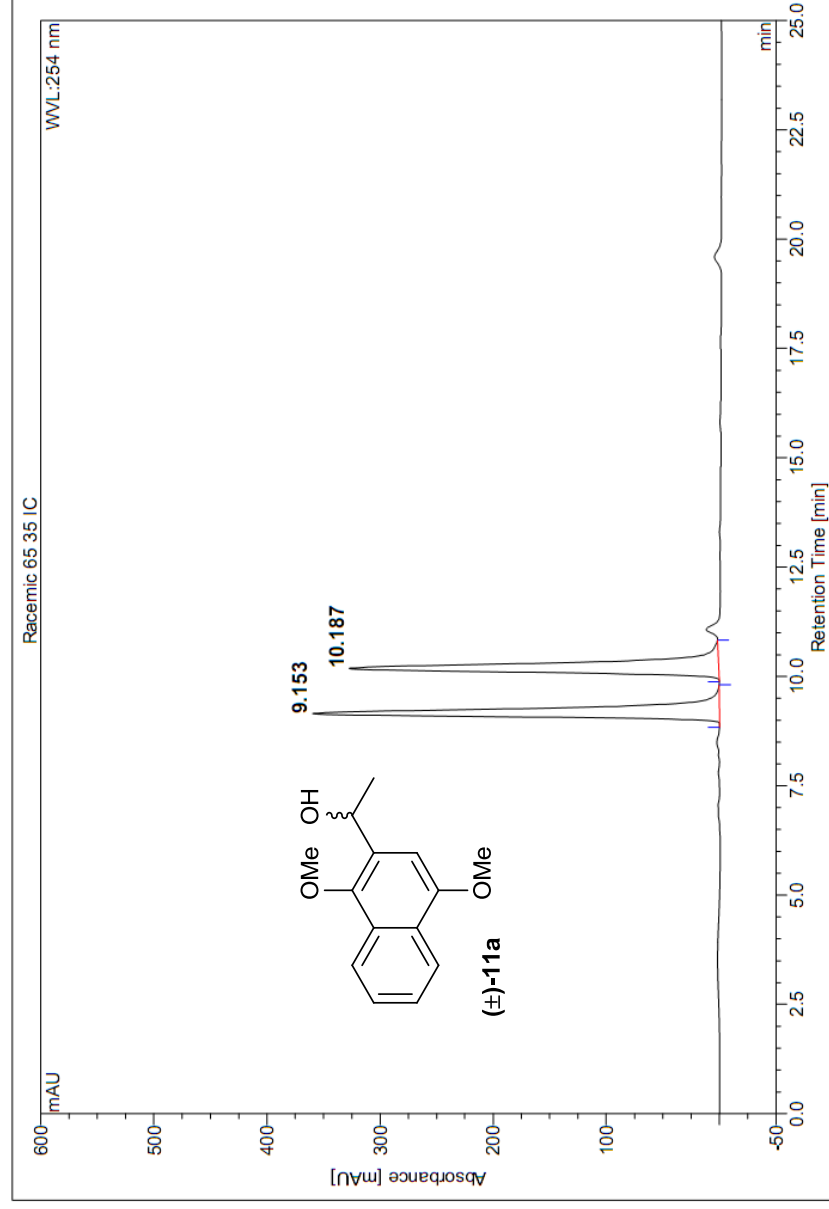

| No.           | Ret.Time min | Peak Name | Height mAU | Area mAU*min | Rel.Area % | Amount | Type |
|---------------|--------------|-----------|------------|--------------|------------|--------|------|
| 1             | 9.15         | n.a.      | 359.864    | 74.678       | 49.92      | n.a.   | BMB* |
| 2             | 10.19        | n.a.      | 326.938    | 74.929       | 50.08      | n.a.   | BMB* |
| <b>Total:</b> |              |           | 686.802    | 149.607      | 100.00     | 0.000  |      |

### 1 ChiralSummer3 IC 65 35

|                  |                        |                   |          |
|------------------|------------------------|-------------------|----------|
| Sample Name:     | ChiralSummer3 IC 65 35 | Injection Volume: | 20.0     |
| Vial Number:     | 2                      | Channel:          | UV_VIS_2 |
| Sample Type:     | unknown                | Wavelength:       | 254      |
| Control Program: | alcohol 65_35          | Bandwidth:        | n.a.     |
| Quantif. Method: | default                | Dilution Factor:  | 1.0000   |
| Recording Time:  | 12/1/2010 14:16        | Sample Weight:    | 1.0000   |
| Run Time (min):  | 21.55                  | Sample Amount:    | 1.0000   |

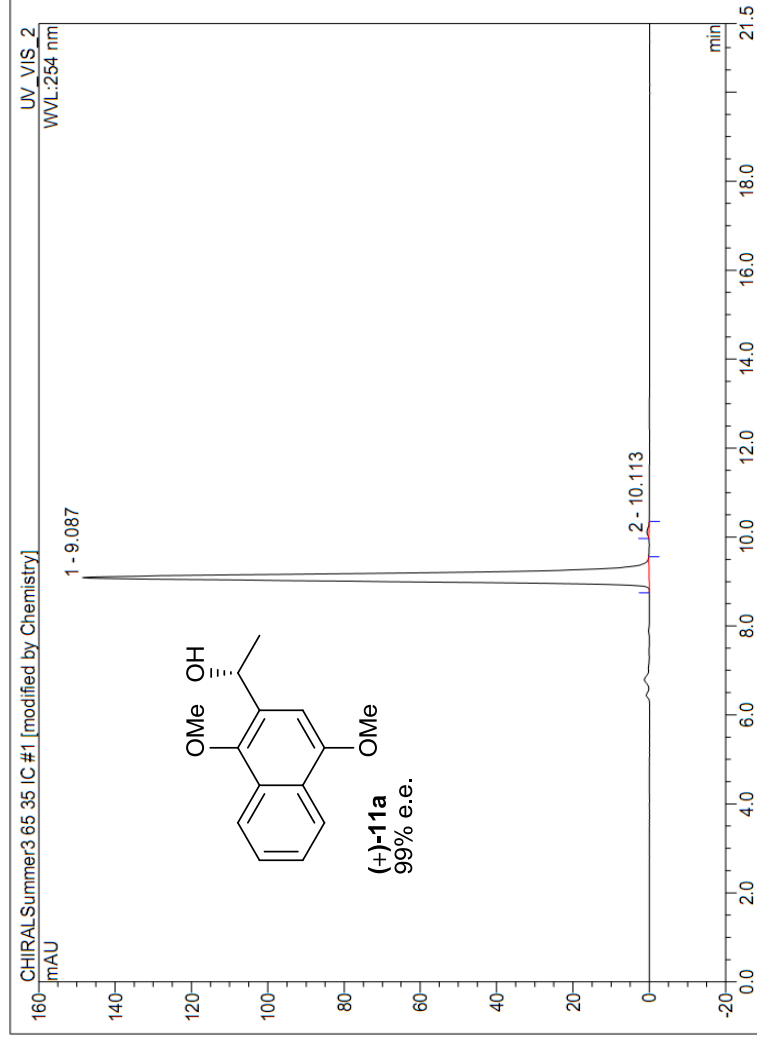

| No.           | Ret. Time min | Peak Name | Height mAU | Area mAU*min | Rel.Area % | Amount | Type |
|---------------|---------------|-----------|------------|--------------|------------|--------|------|
| 1             | 9.09          | n.a.      | 148.492    | 28.446       | 99.65      | n.a.   | BMB* |
| 2             | 10.11         | n.a.      | 0.570      | 0.100        | 0.35       | n.a.   | BMB* |
| <b>Total:</b> |               |           | 149.061    | 28.545       | 100.00     | 0.000  |      |



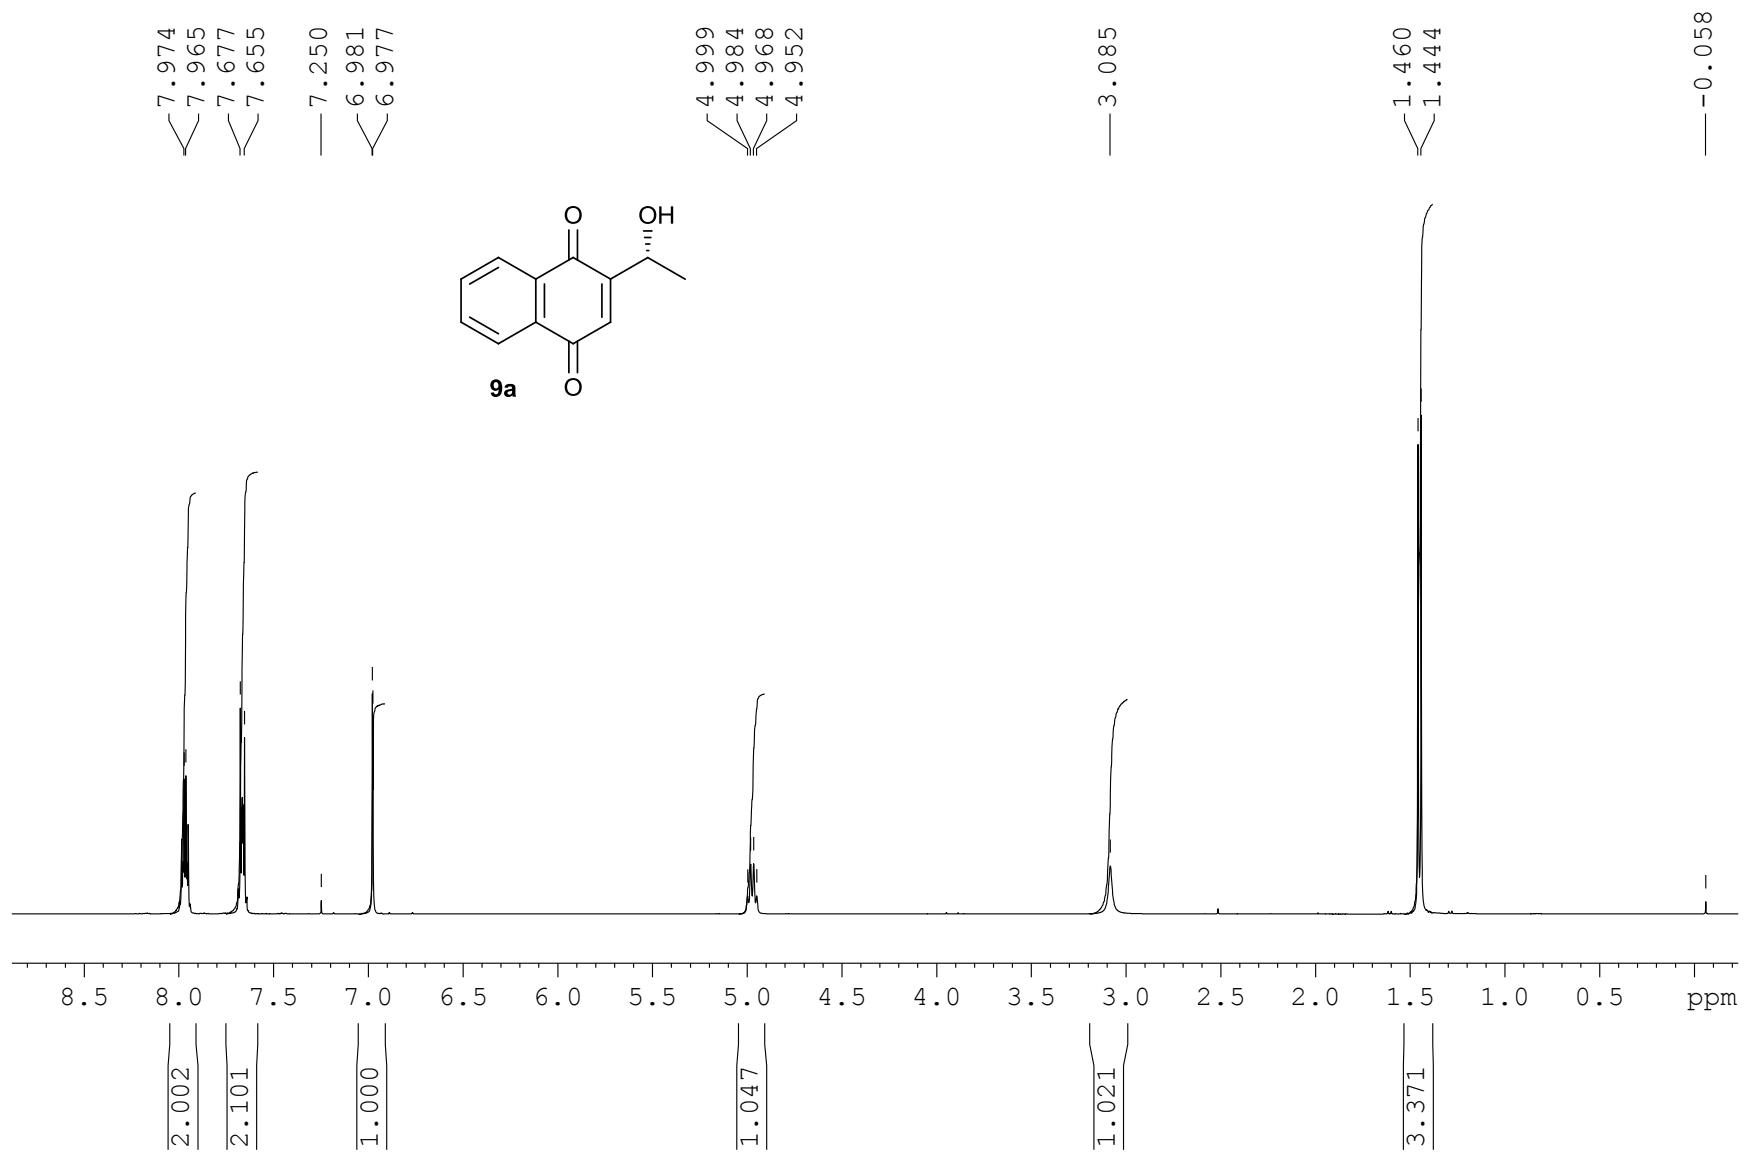

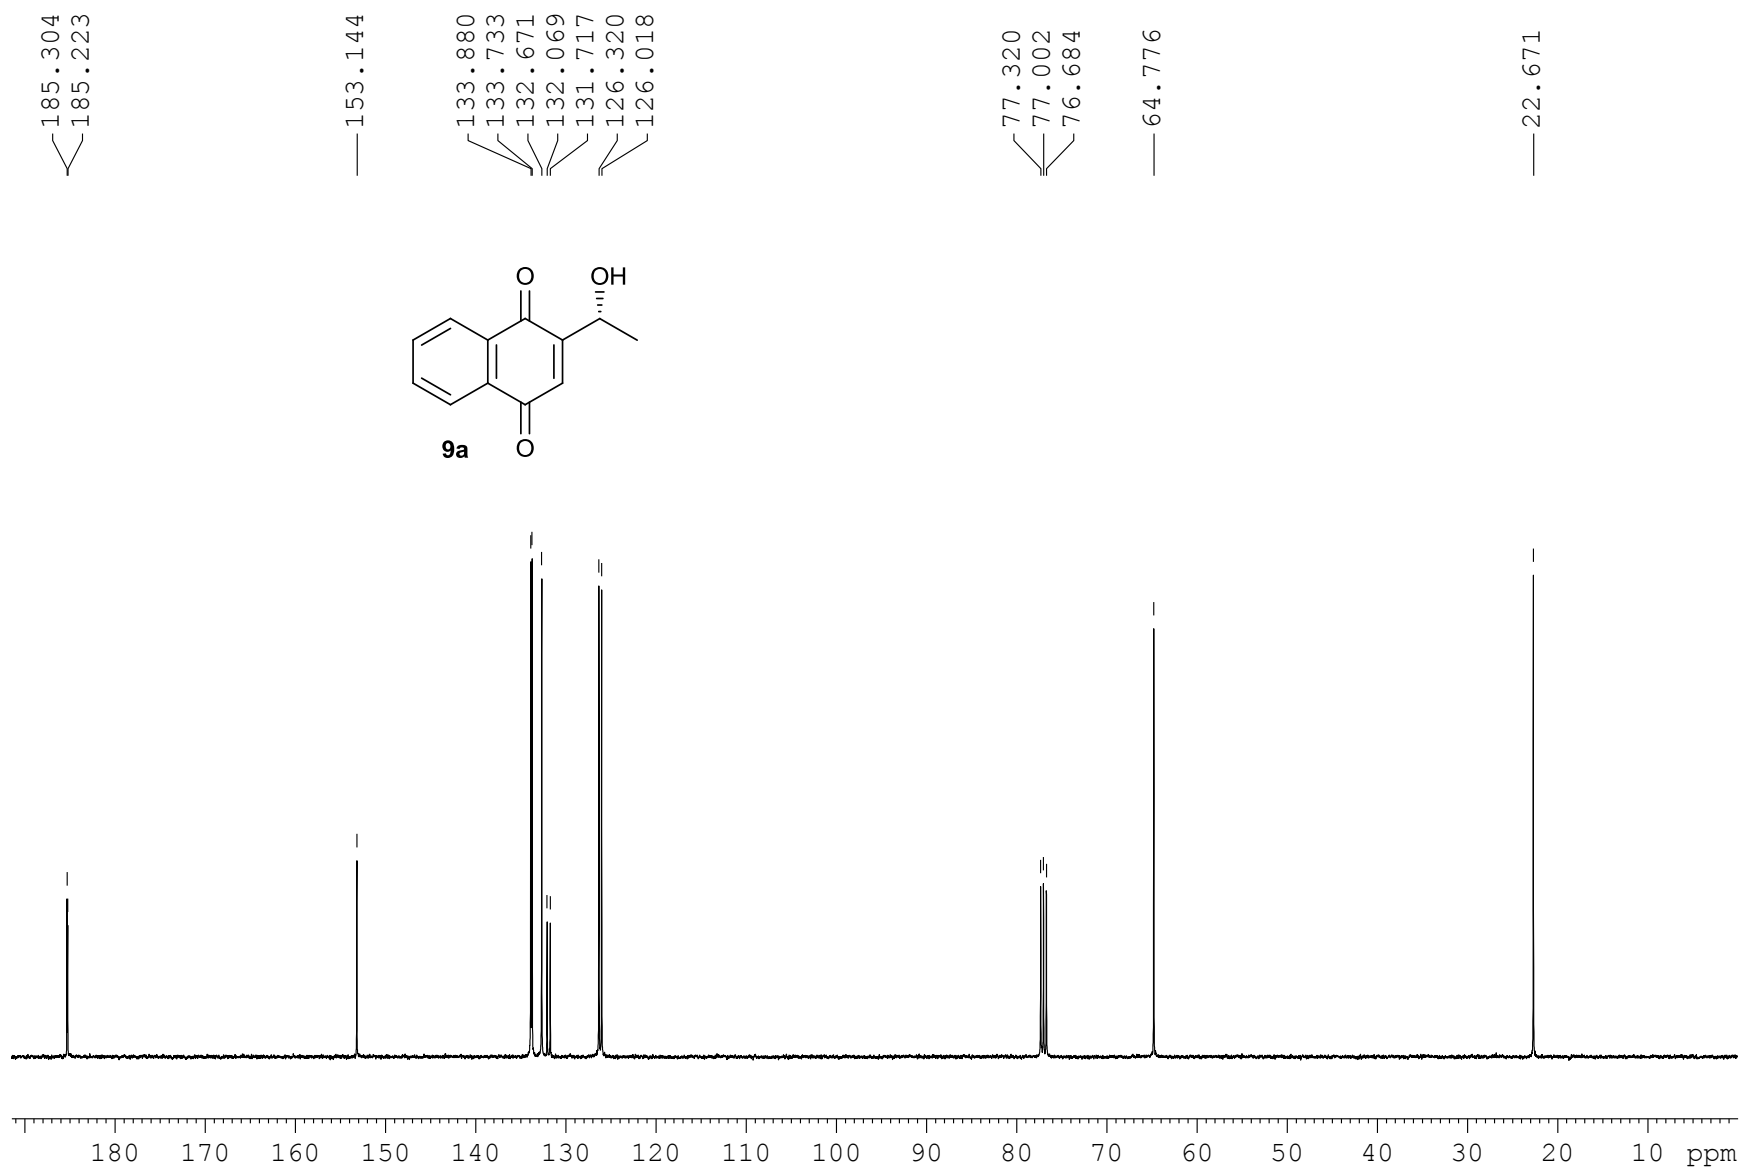

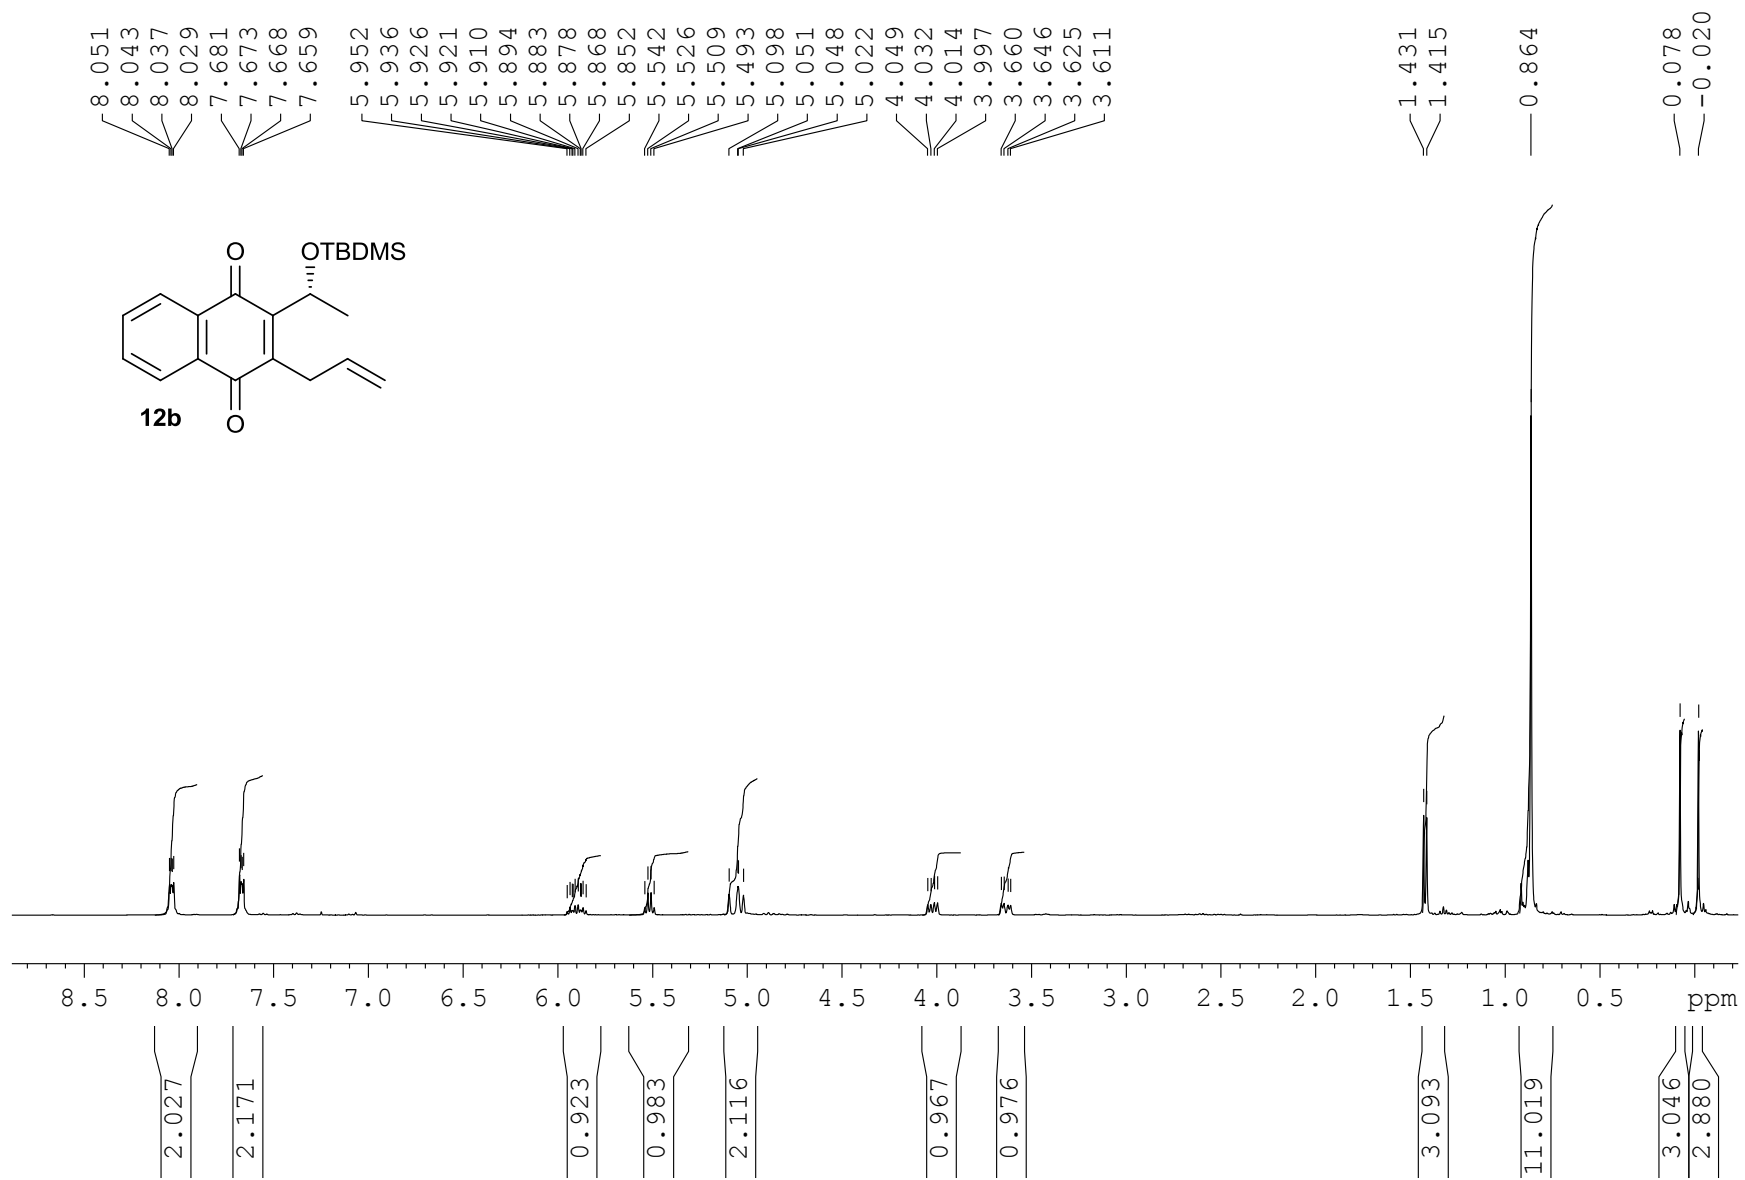

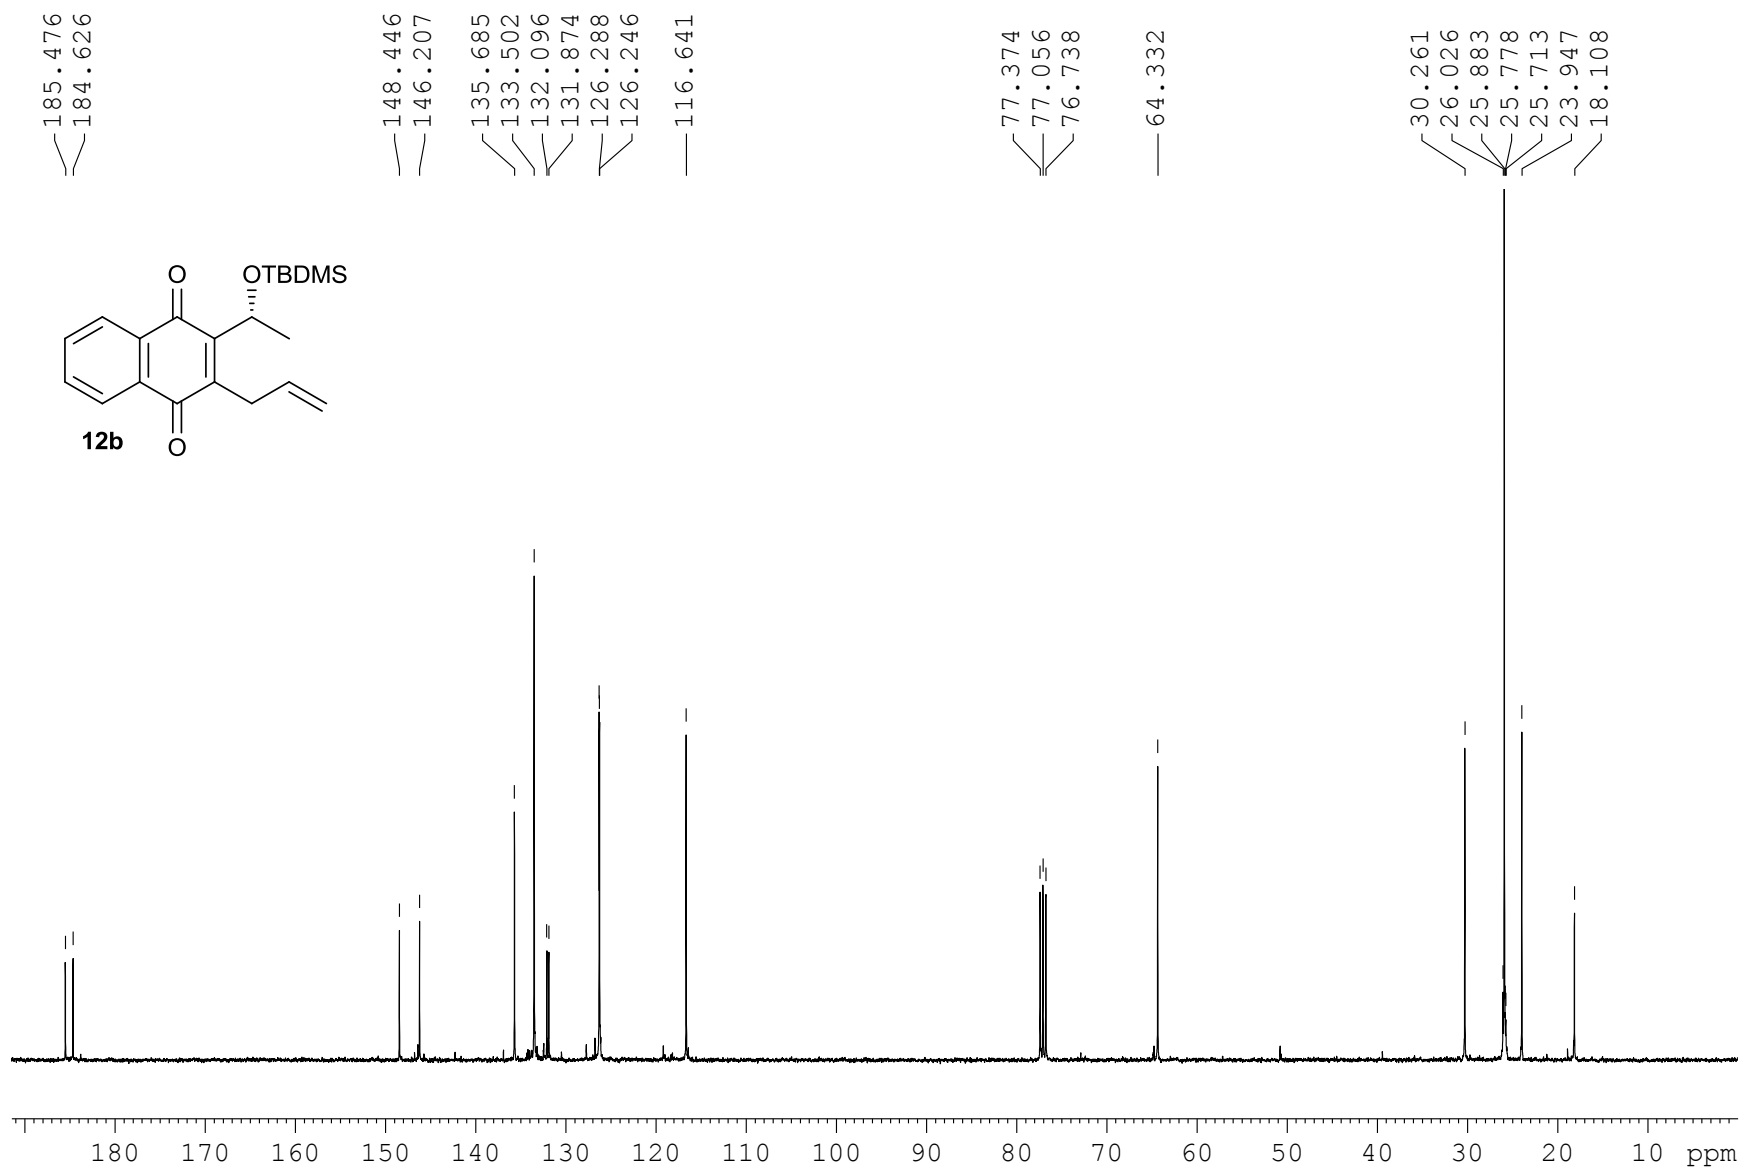

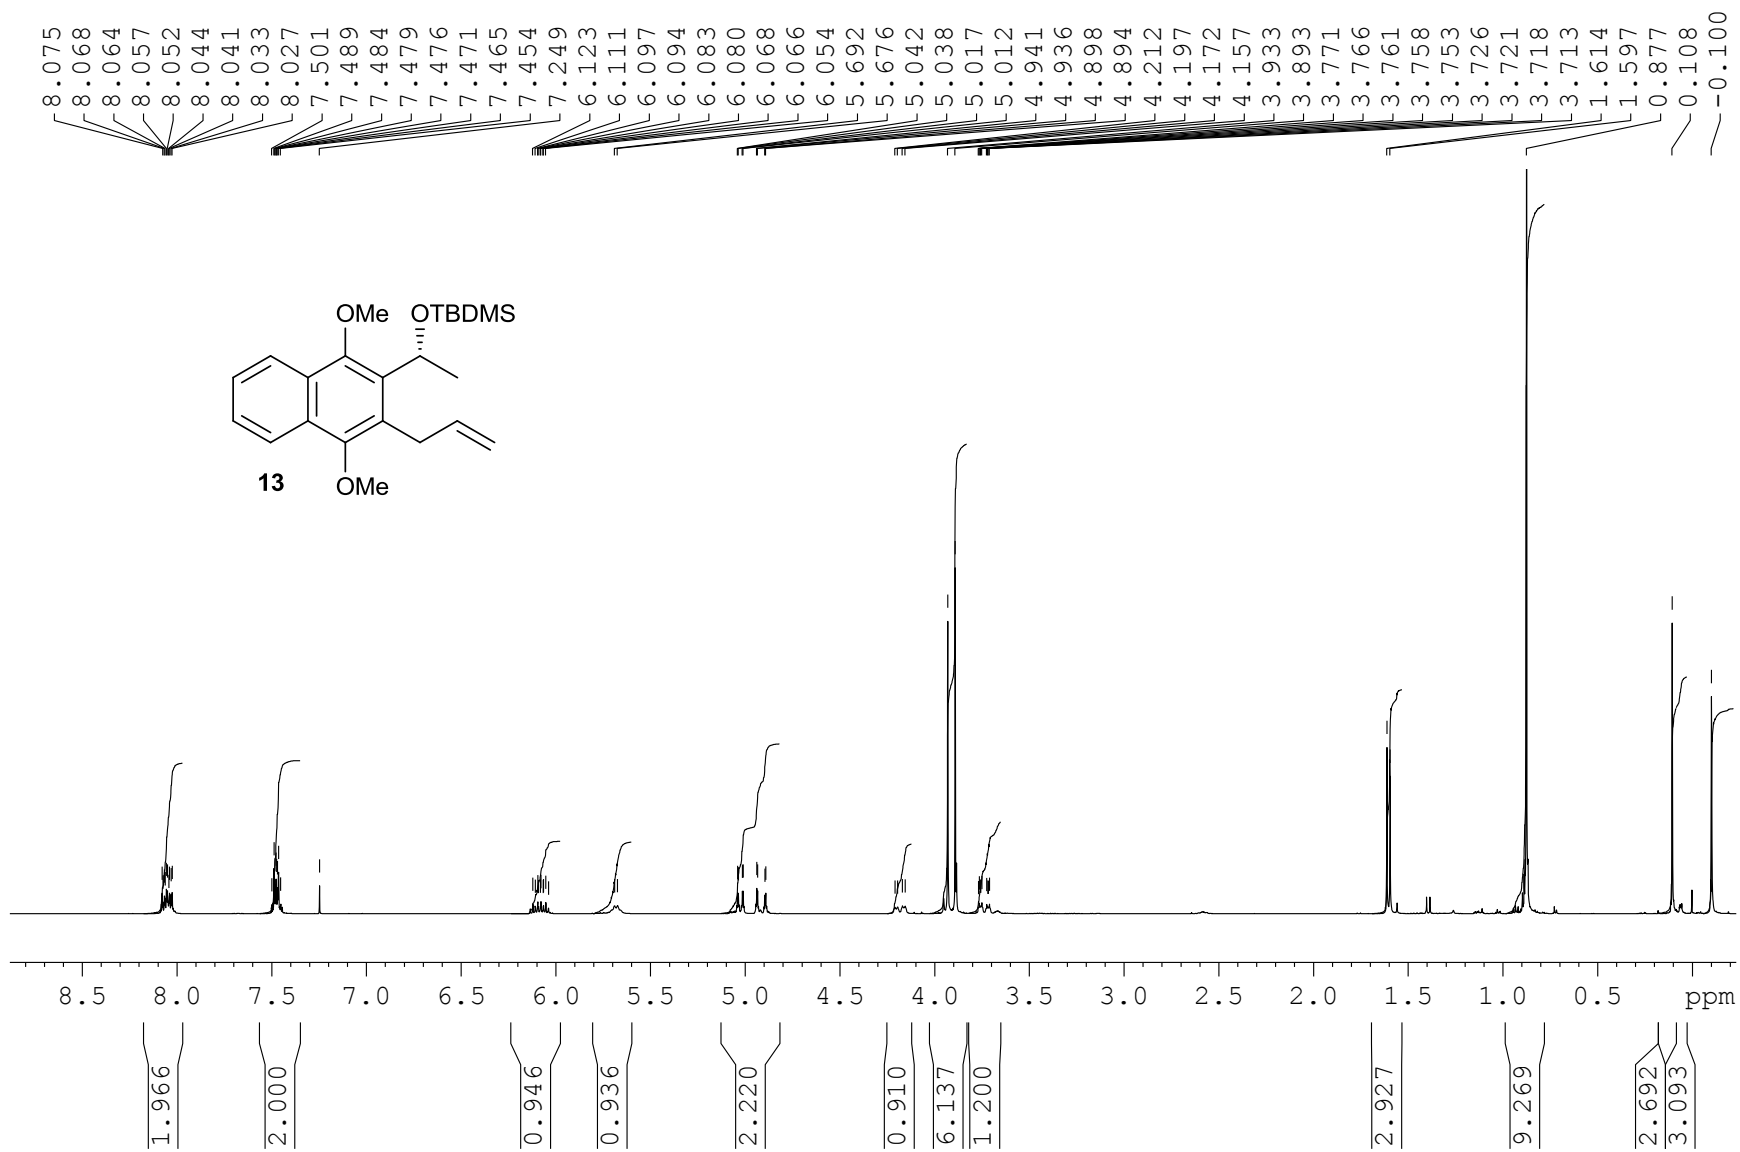

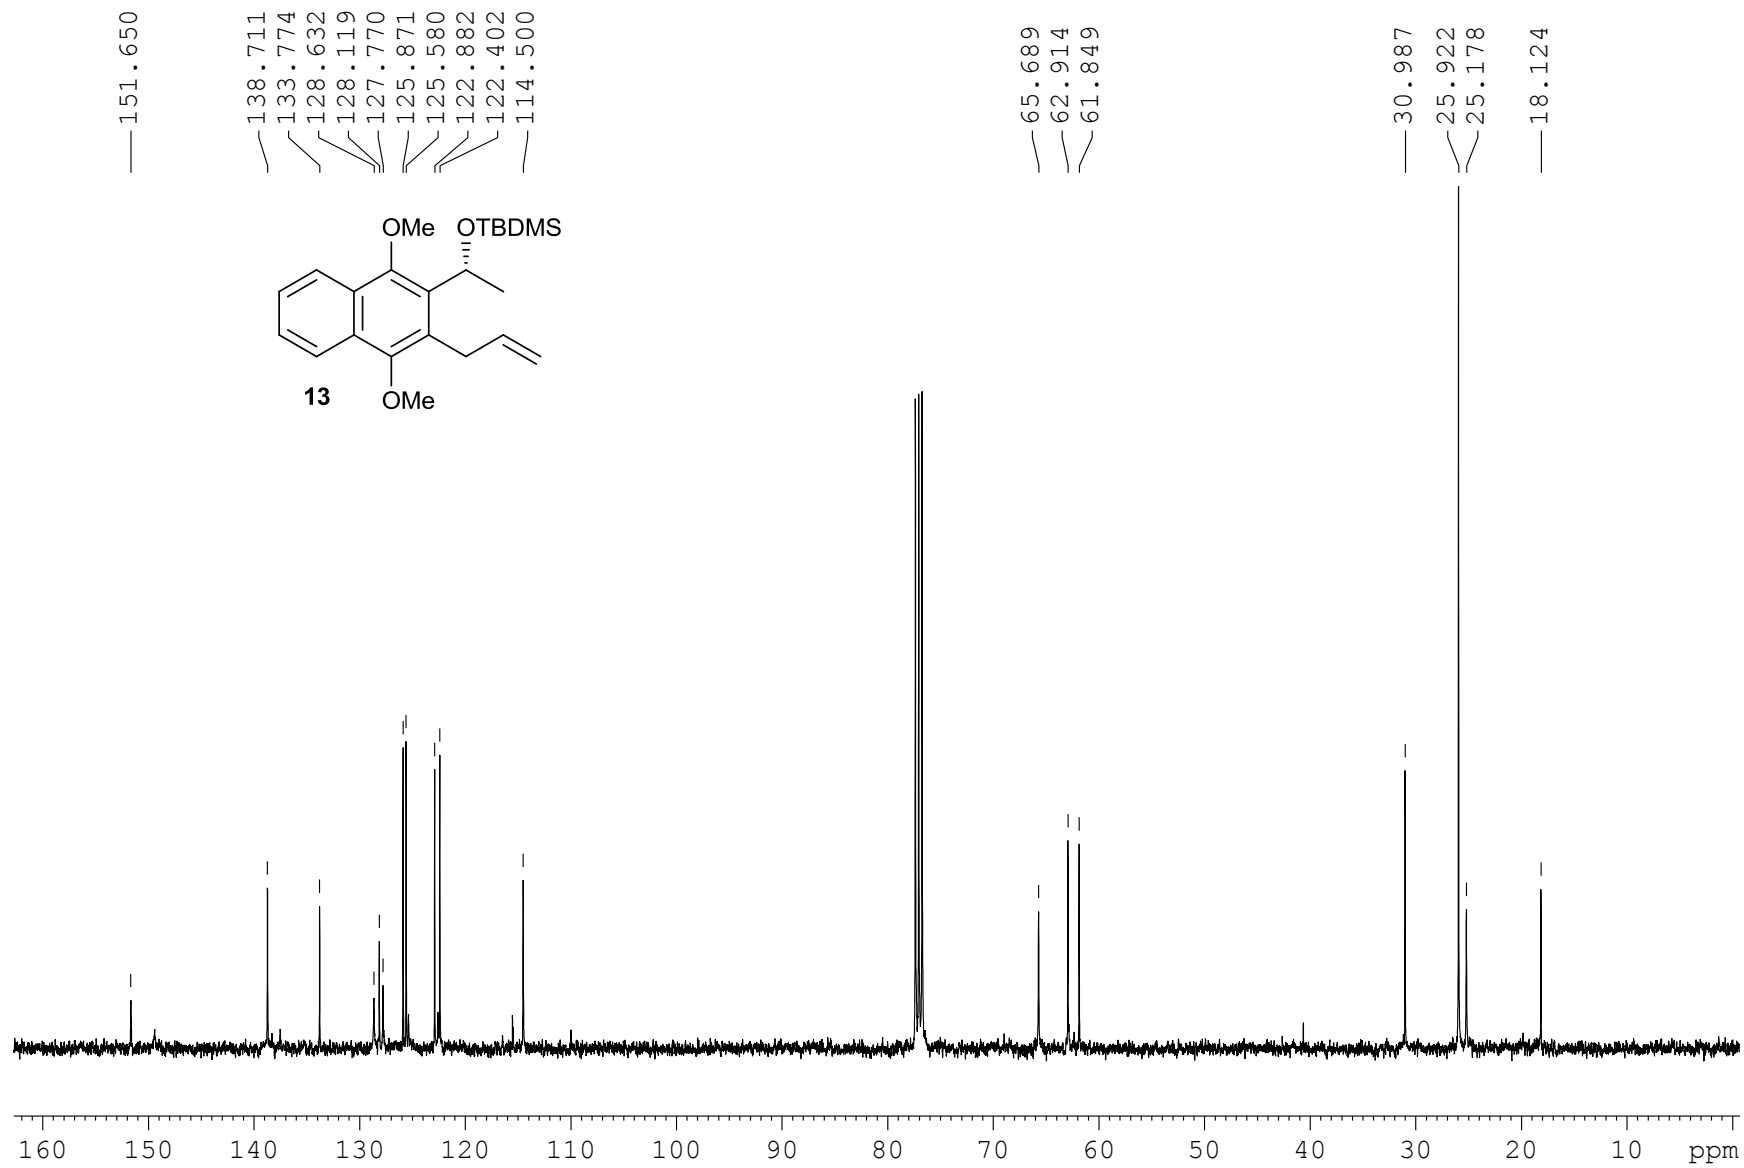

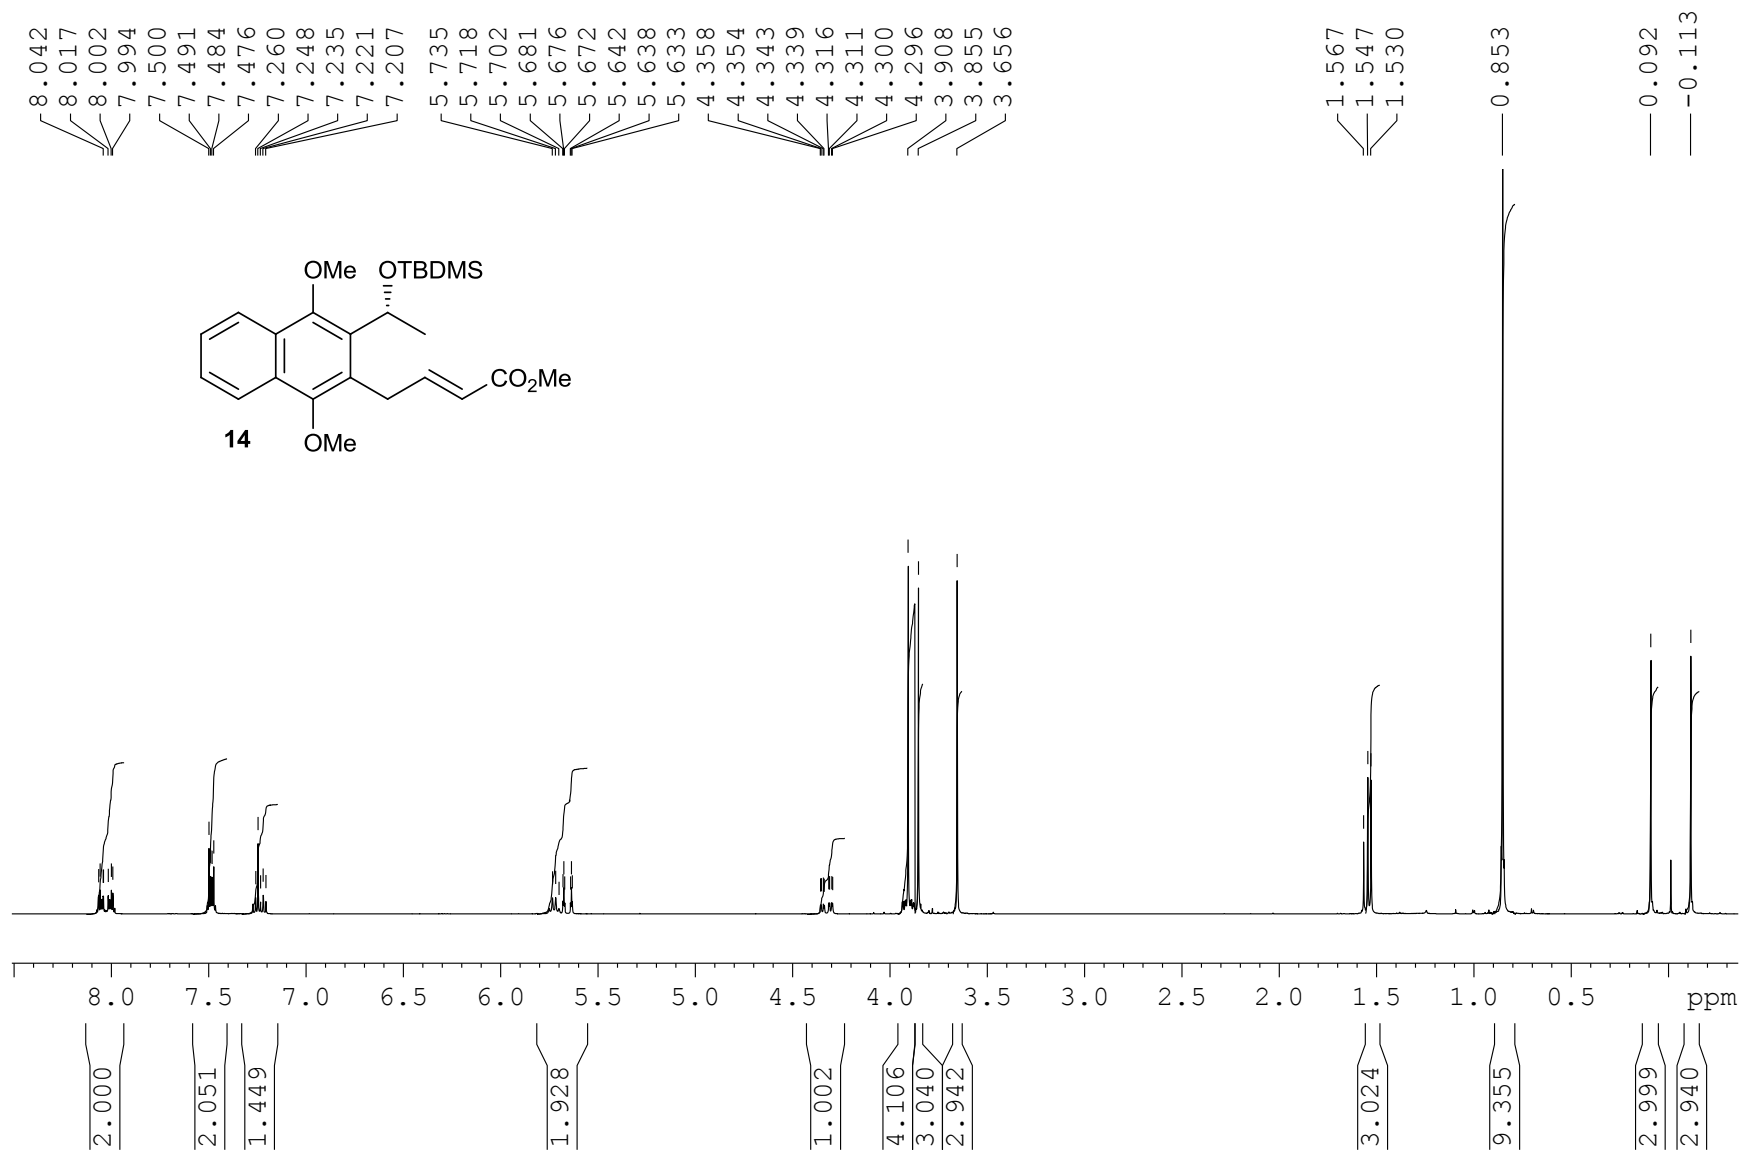

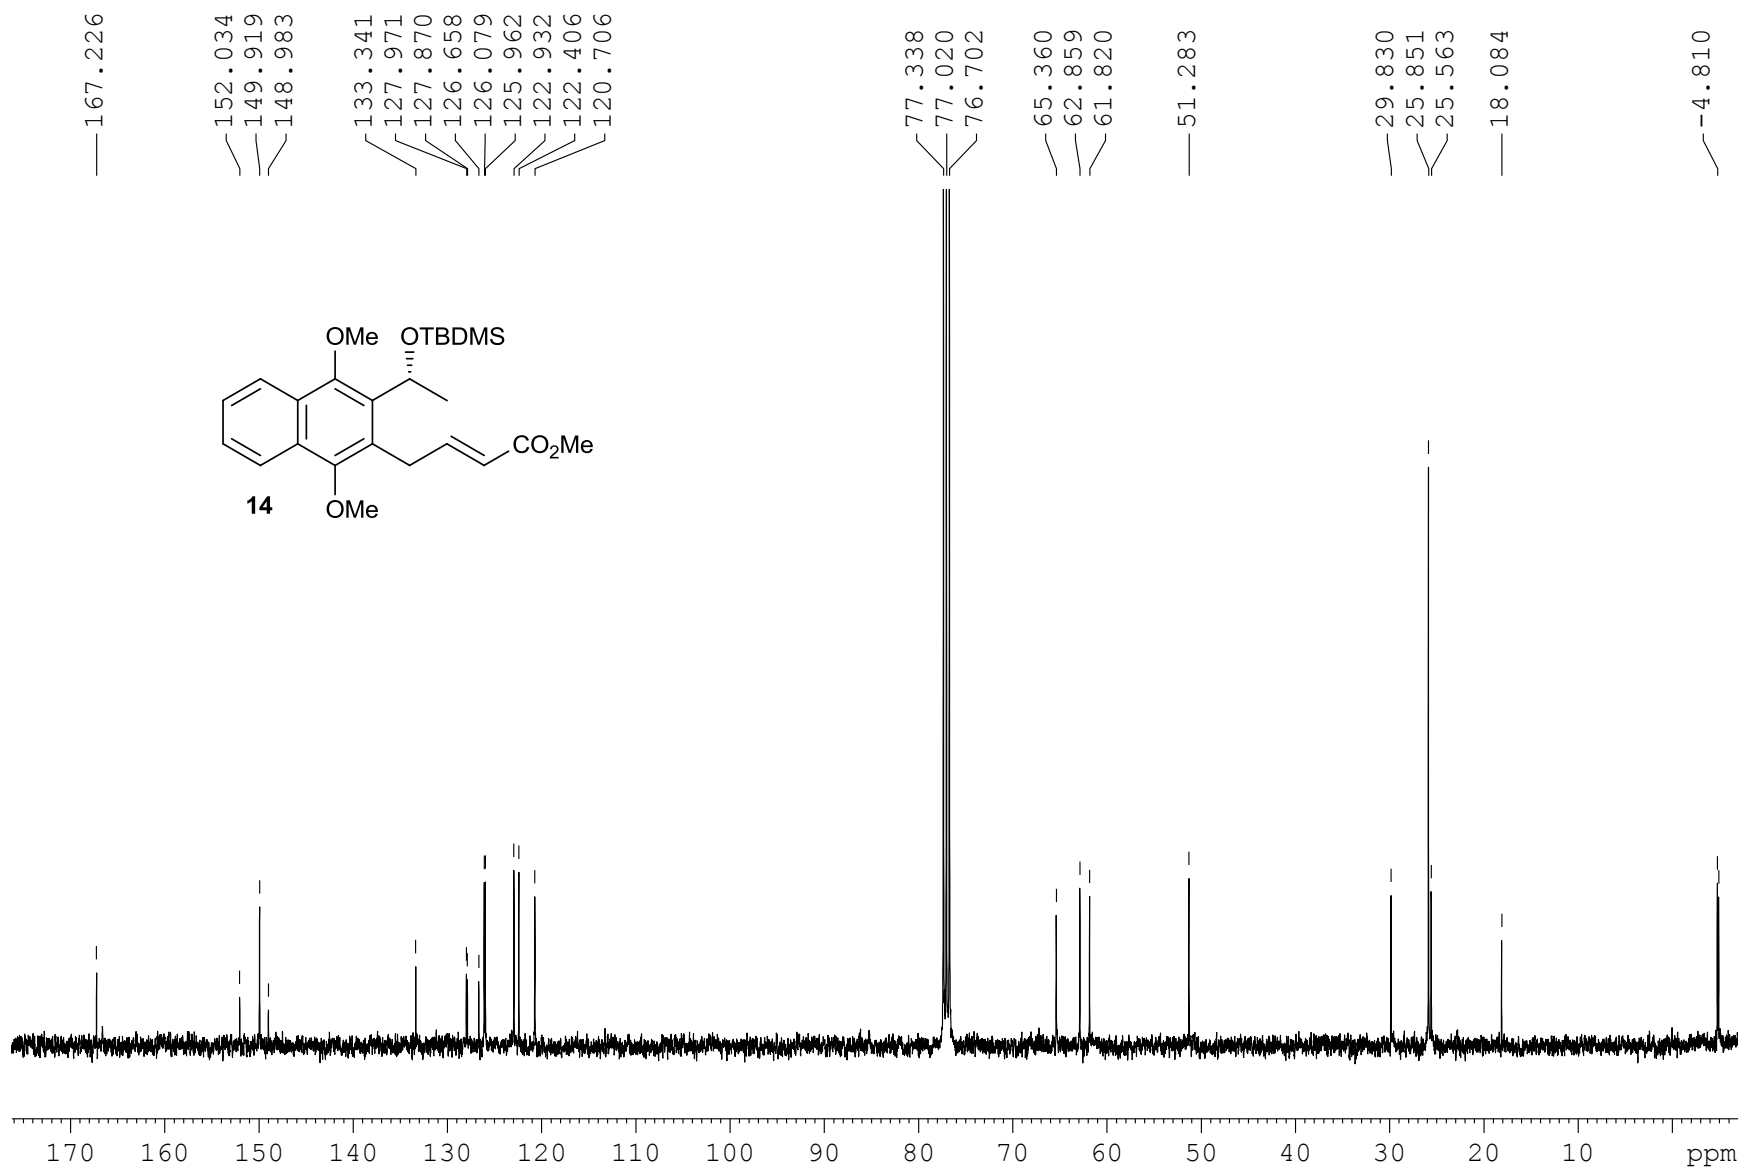



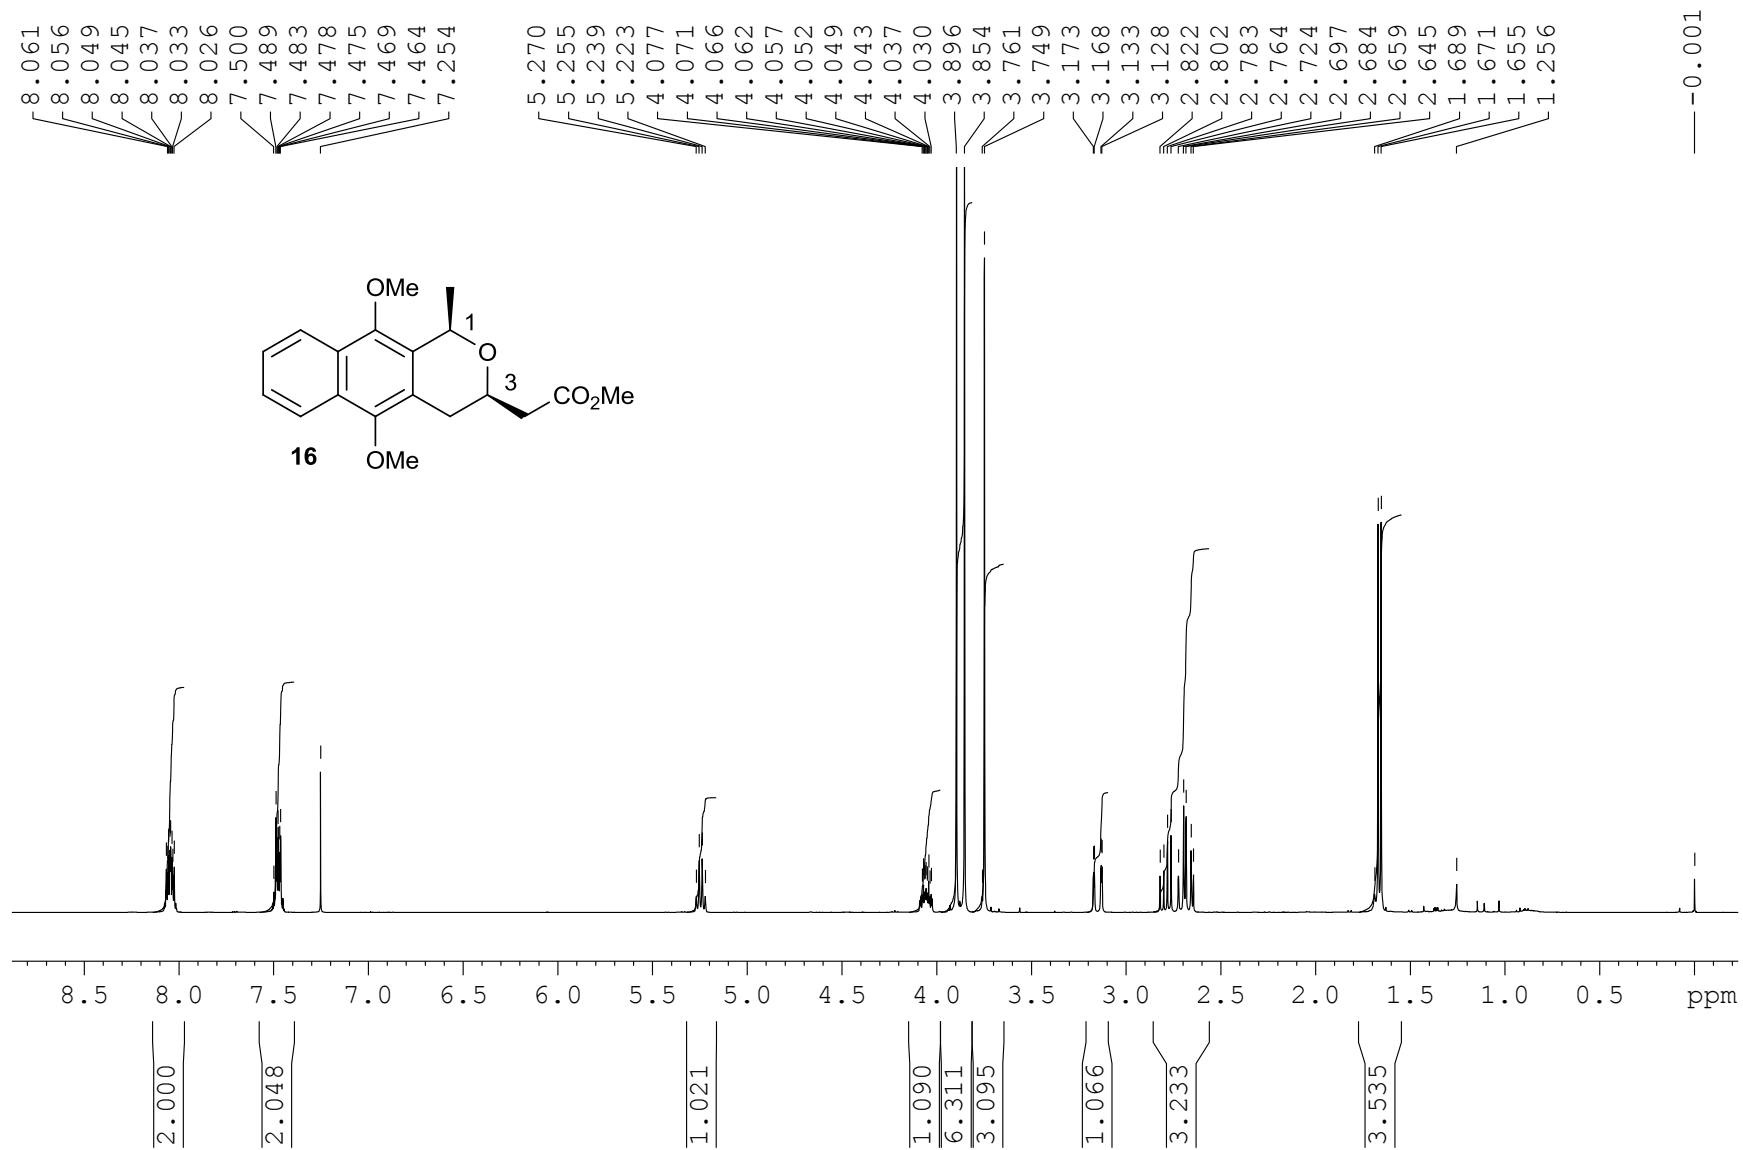

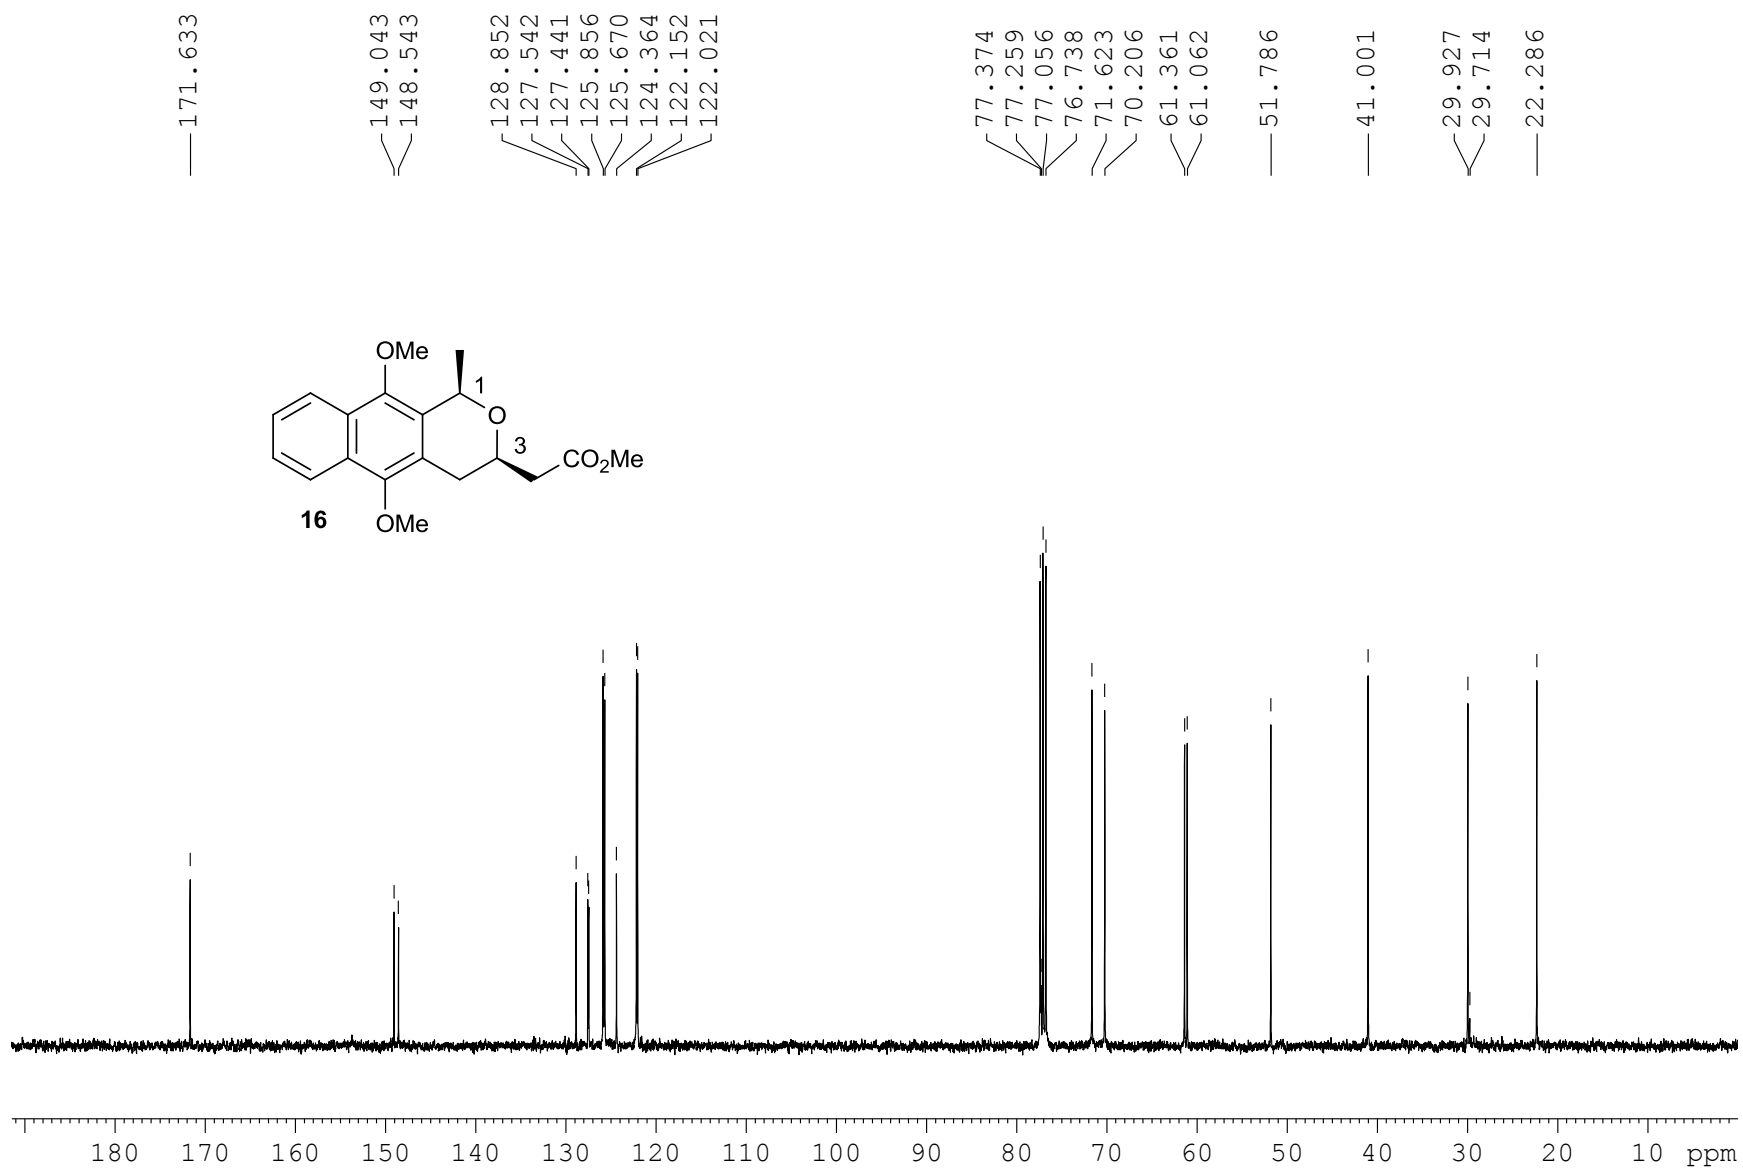

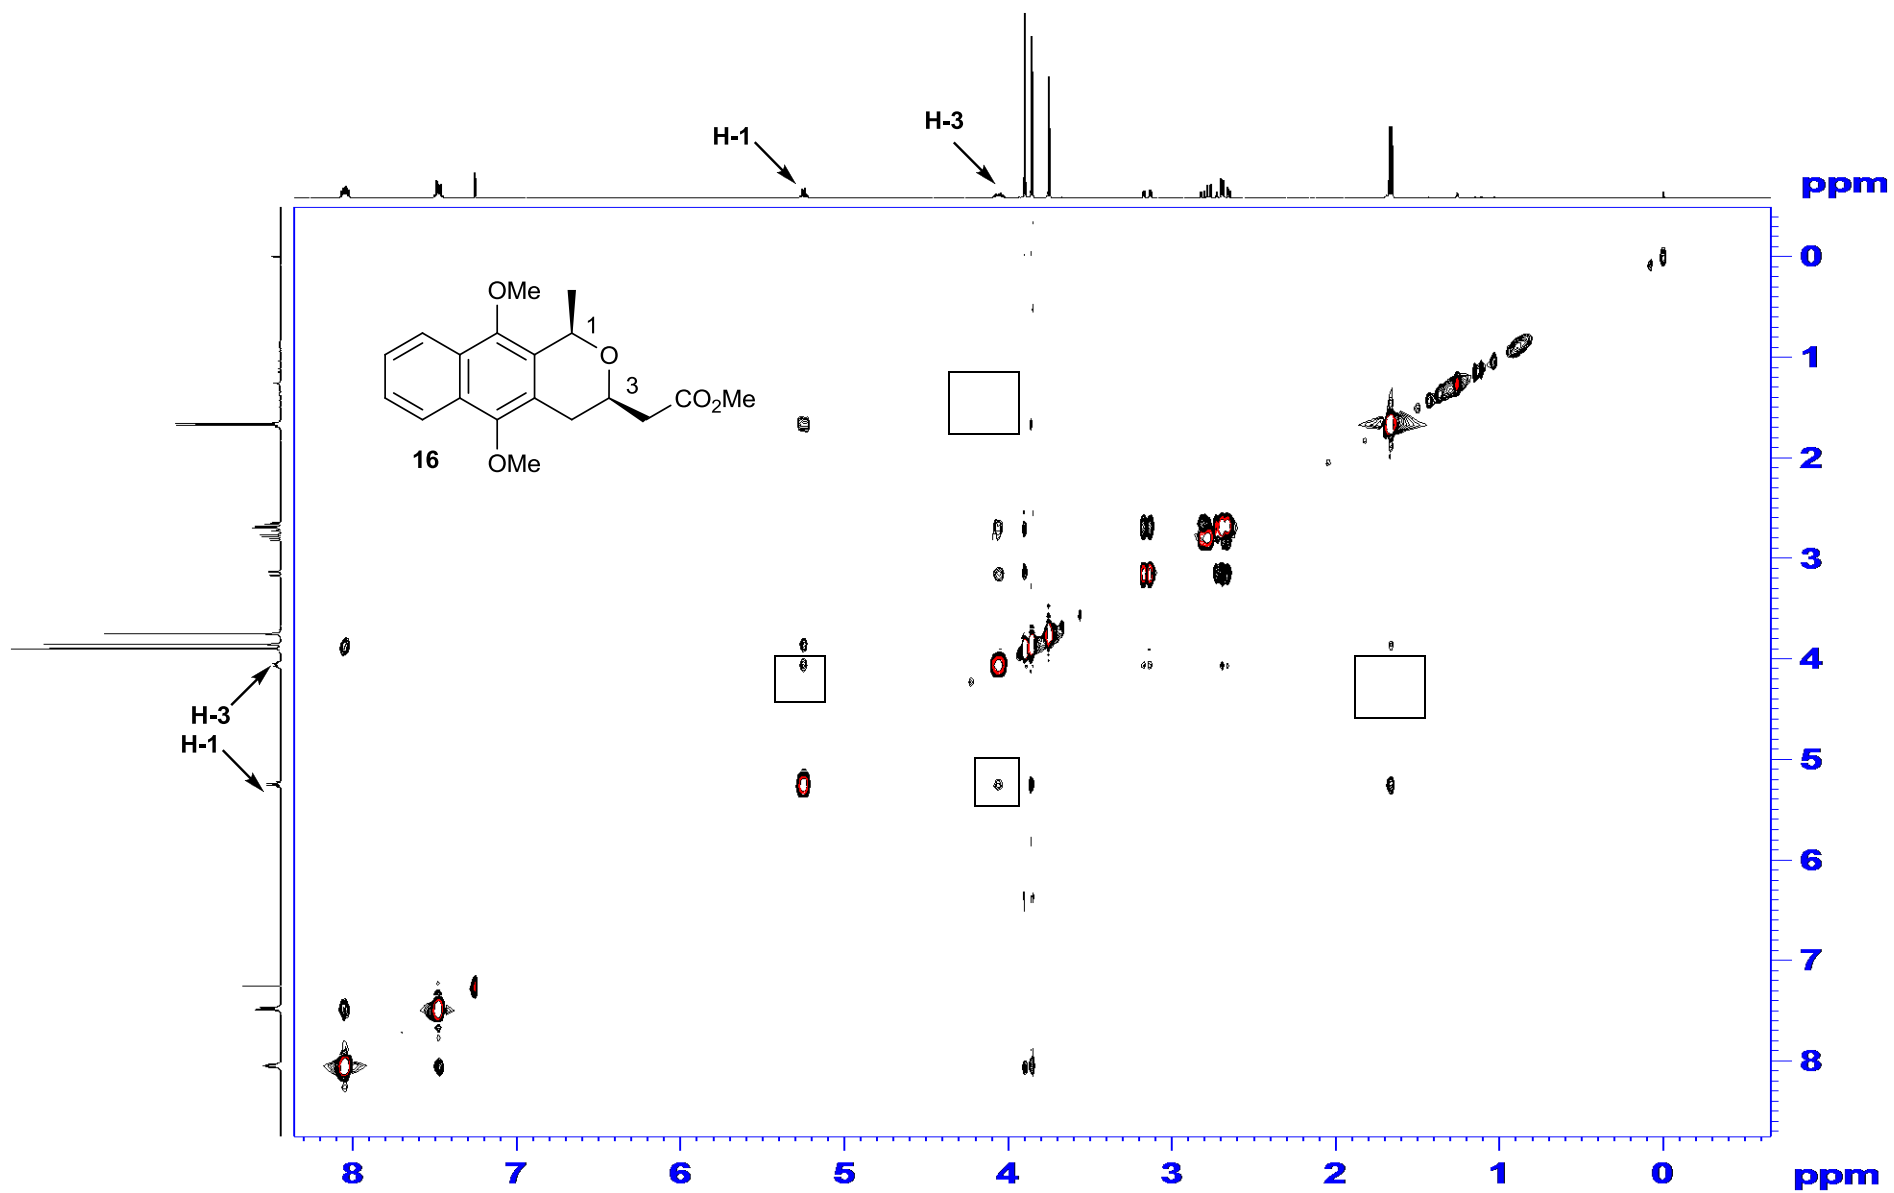

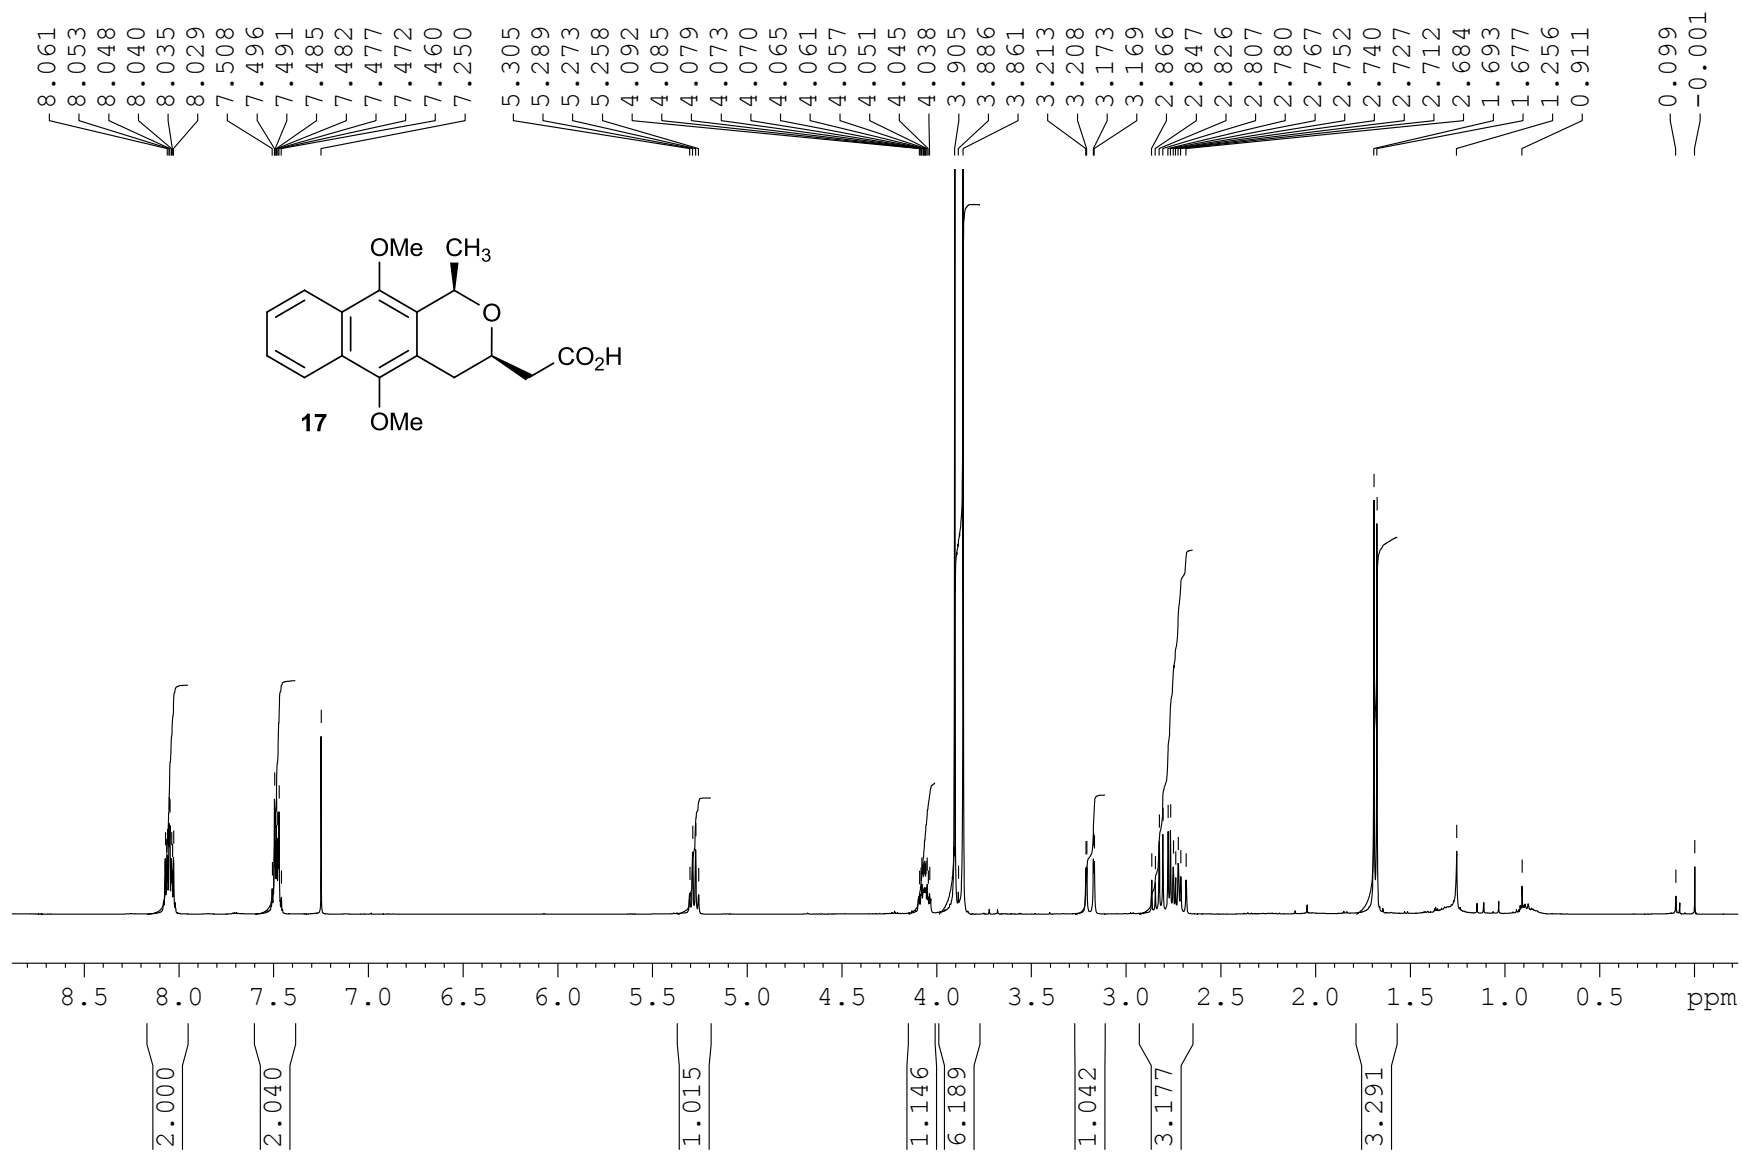

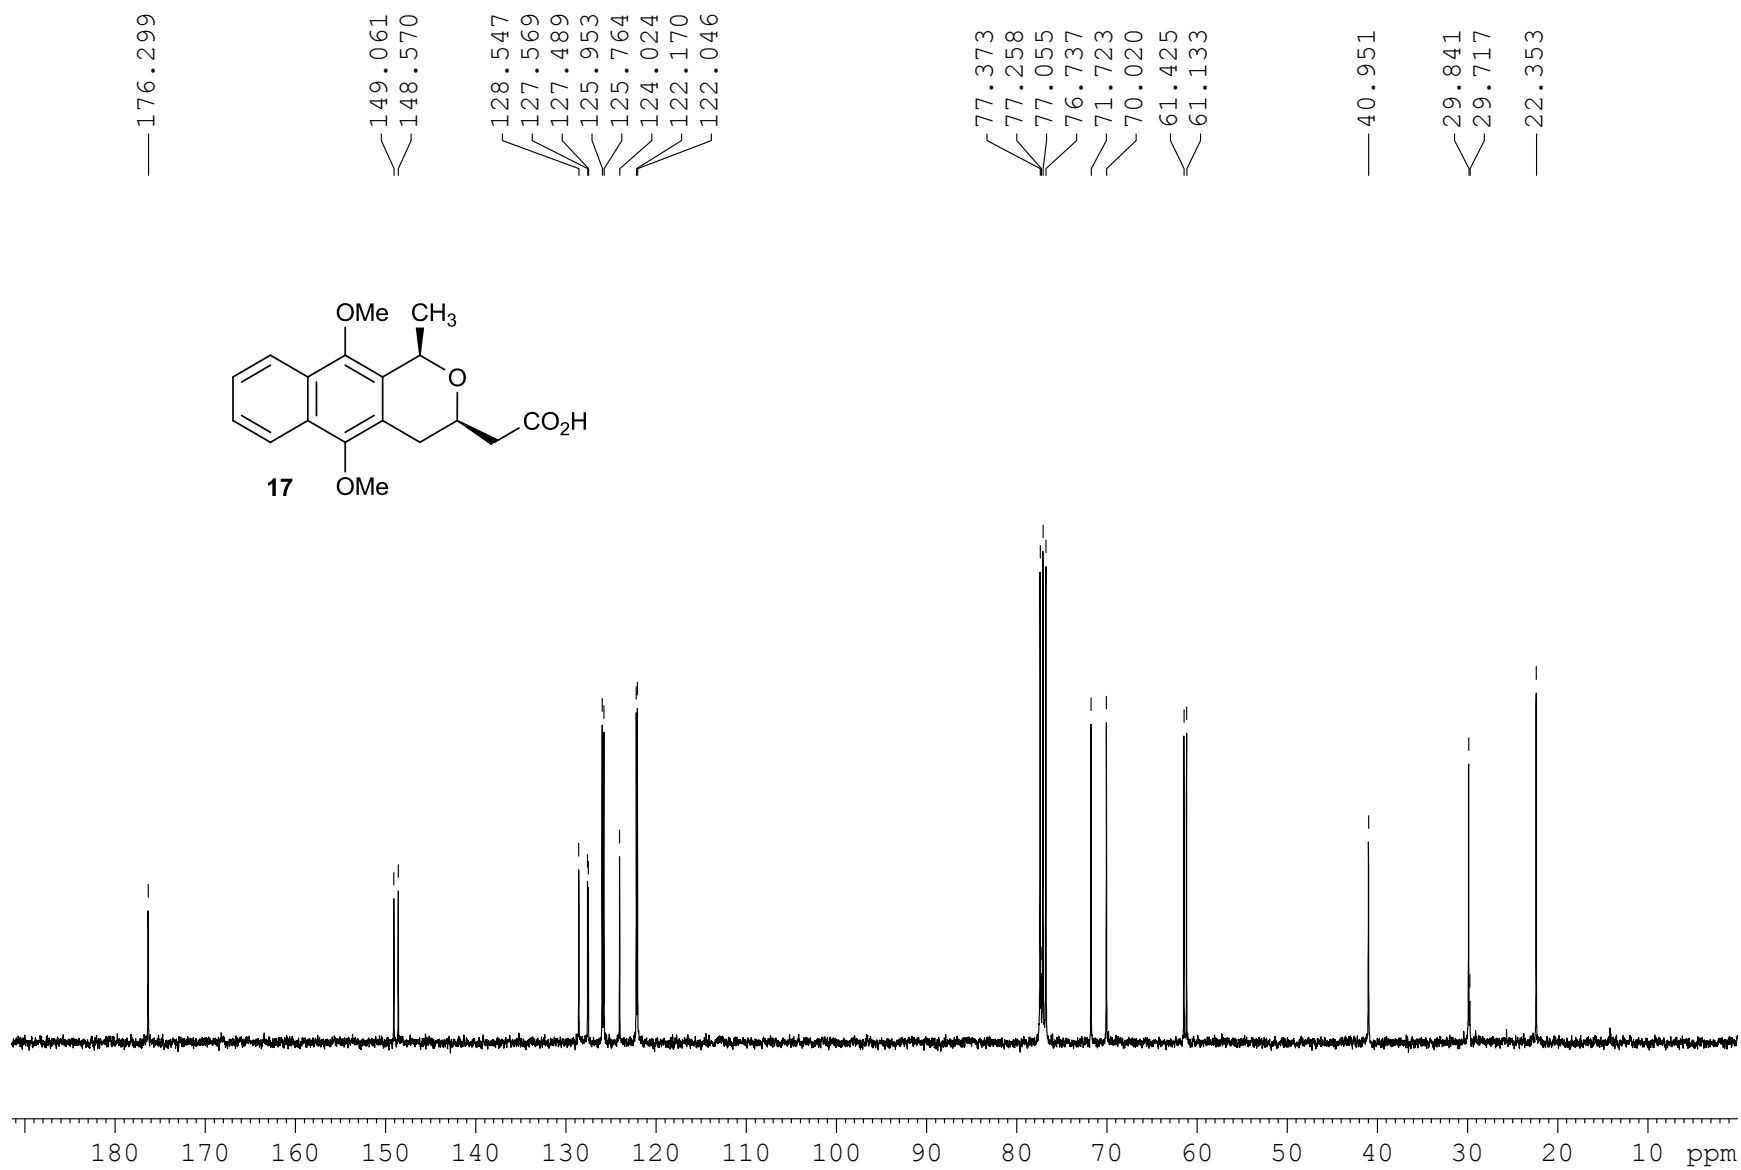

| 1 Cis Acid IC 65 35 2 |                     |
|-----------------------|---------------------|
| Sample Name:          | Cis Acid IC 65 35 2 |
| Vial Number:          | 2                   |
| Sample Type:          | unknown             |
| Control Program:      | alcohol 65_35       |
| Quantif. Method:      | default             |
| Recording Time:       | 2/4/2011 12:20      |
| Run Time (min):       | 30.07               |
| Injection Volume:     | 20.0                |
| Channel:              | UV_VIS_1            |
| Wavelength:           | 210                 |
| Bandwidth:            | n.a.                |
| Dilution Factor:      | 1.0000              |
| Sample Weight:        | 1.0000              |
| Sample Amount:        | 1.0000              |

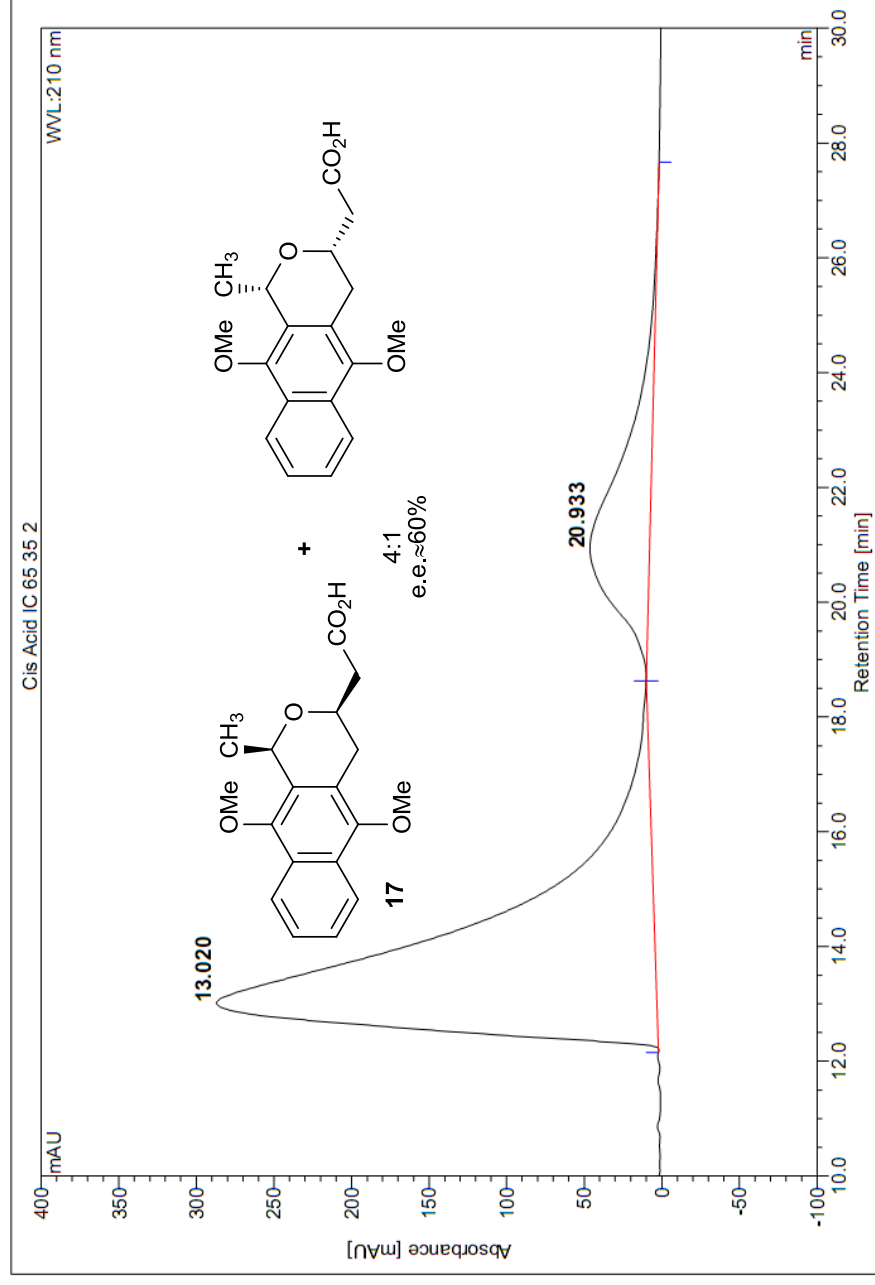

| No.           | Ret.Time min | Peak Name | Height mAU | Area mAU*min | Rel.Area % | Amount | Type |
|---------------|--------------|-----------|------------|--------------|------------|--------|------|
| 1             | 13.02        | n.a.      | 283.761    | 529.741      | 82.64      | n.a.   | BMB* |
| 2             | 20.93        | n.a.      | 38.272     | 111.280      | 17.36      | n.a.   | bMB* |
| <b>Total:</b> |              |           | 322.033    | 641.021      | 100.00     | 0.000  |      |

| 1 Cis Acid IC 65 35 3 |                     |
|-----------------------|---------------------|
| Sample Name:          | Cis Acid IC 65 35 3 |
| Vial Number:          | 2                   |
| Sample Type:          | unknown             |
| Control Program:      | alcohol 65_35       |
| Quantif. Method:      | default             |
| Recording Time:       | 2/4/2011 12:55      |
| Run Time (min):       | 31.00               |
| Injection Volume:     | 20.0                |
| Channel:              | UV_VIS_1            |
| Wavelength:           | 210                 |
| Bandwidth:            | n.a.                |
| Dilution Factor:      | 1.0000              |
| Sample Weight:        | 1.0000              |
| Sample Amount:        | 1.0000              |

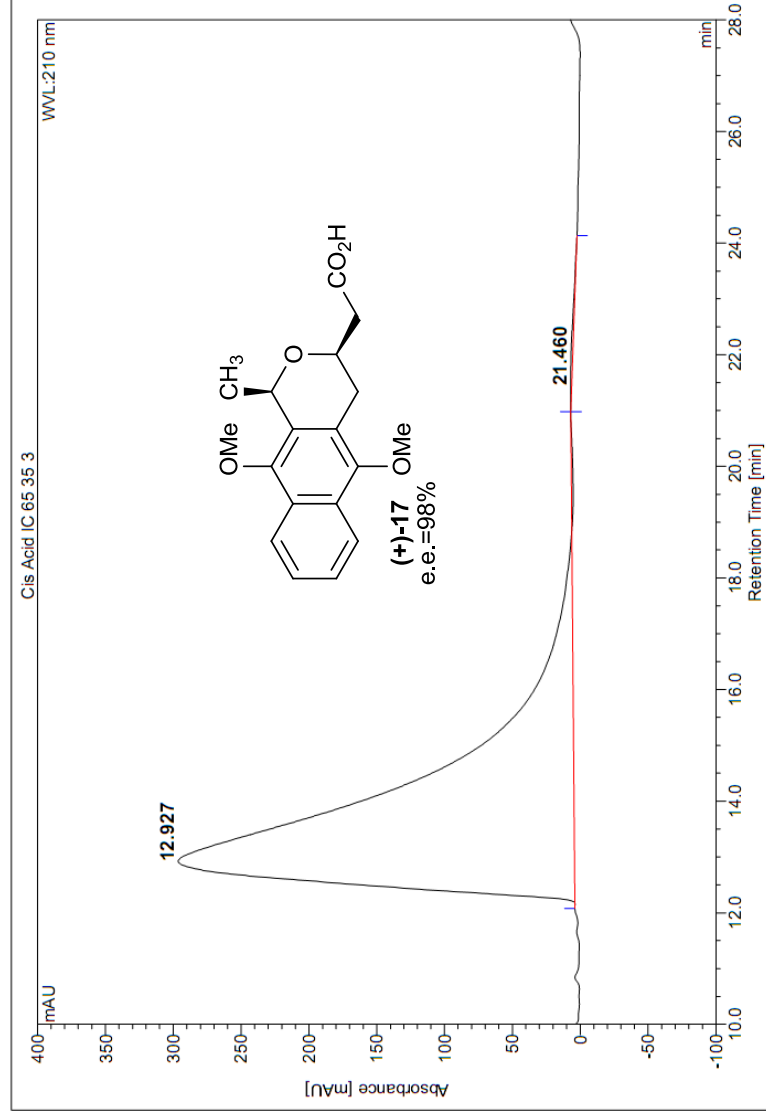

| No.           | Ret.Time min | Peak Name | Height mAU | Area mAU*min | Rel.Area % | Amount | Type |
|---------------|--------------|-----------|------------|--------------|------------|--------|------|
| 1             | 12.93        | n.a.      | 292.266    | 552.464      | 99.61      | n.a.   | BMB* |
| 2             | 21.46        | n.a.      | 0.822      | 2.186        | 0.39       | n.a.   | bMB* |
| <b>Total:</b> |              |           | 293.088    | 554.650      | 100.00     | 0.000  |      |

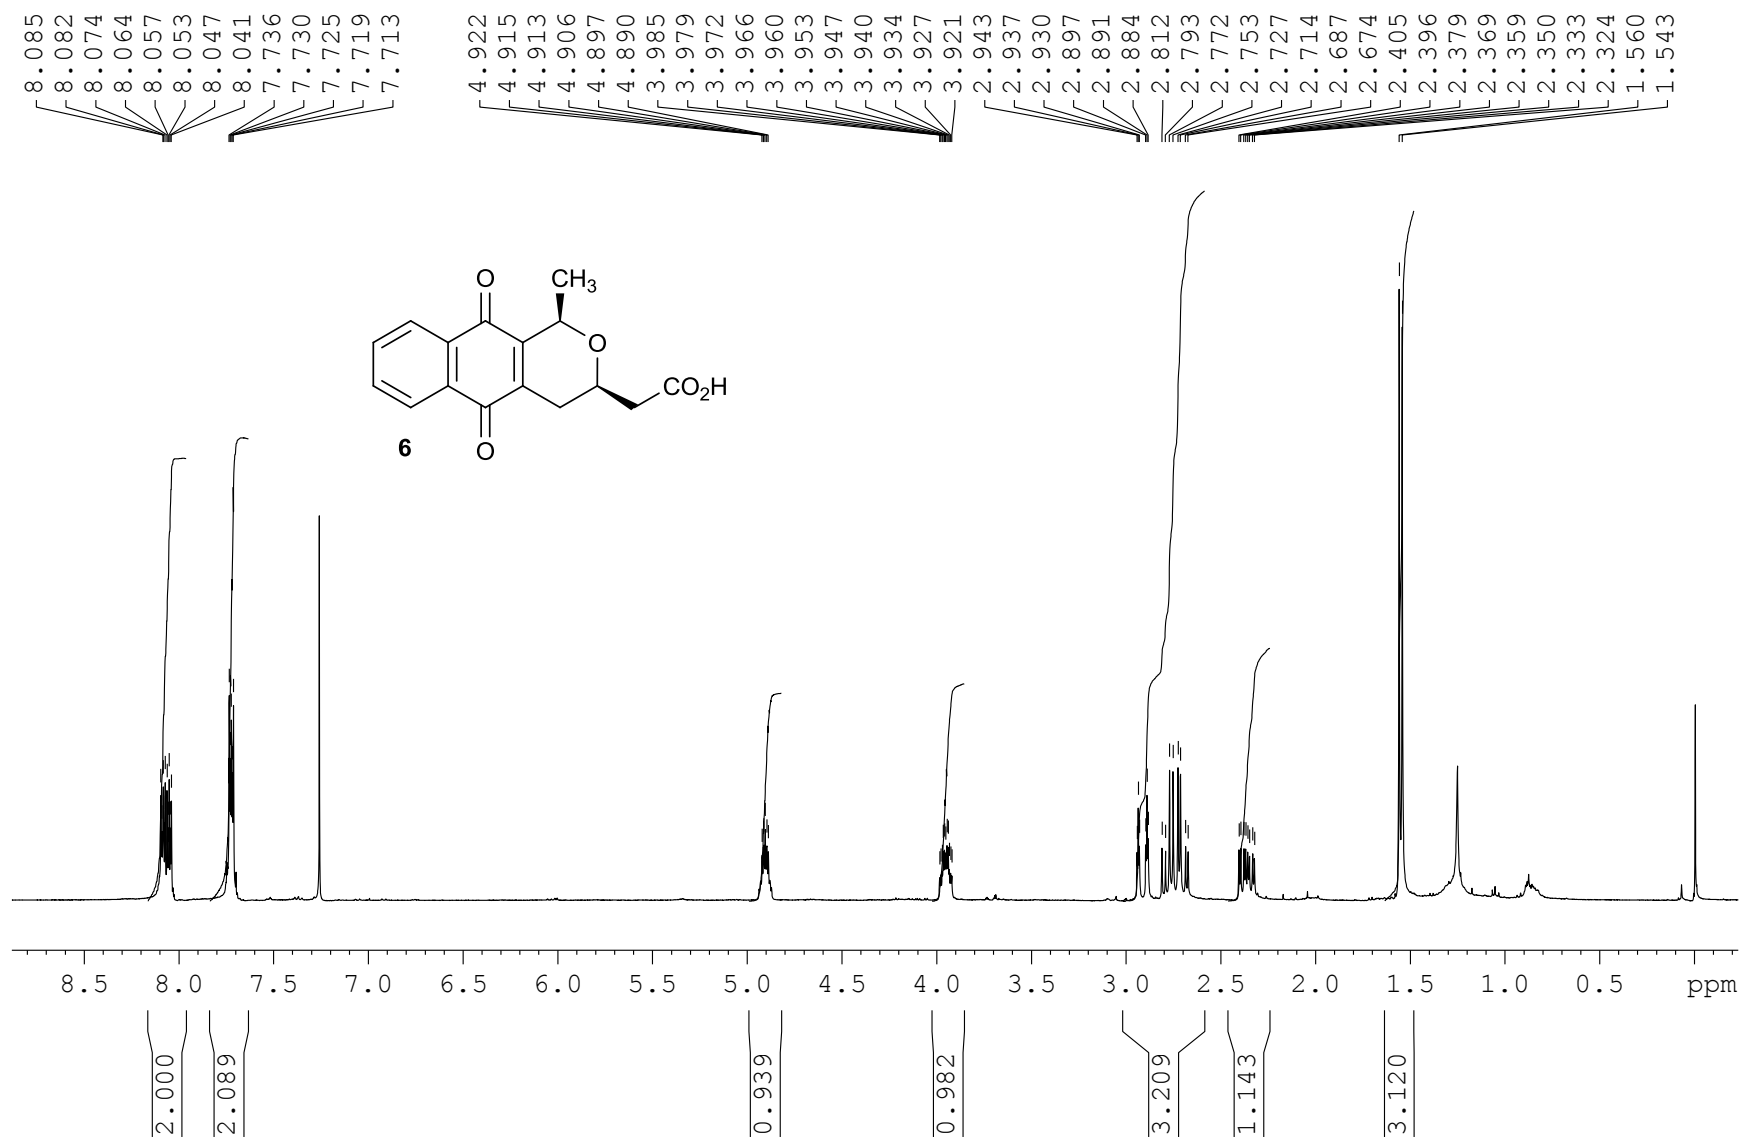



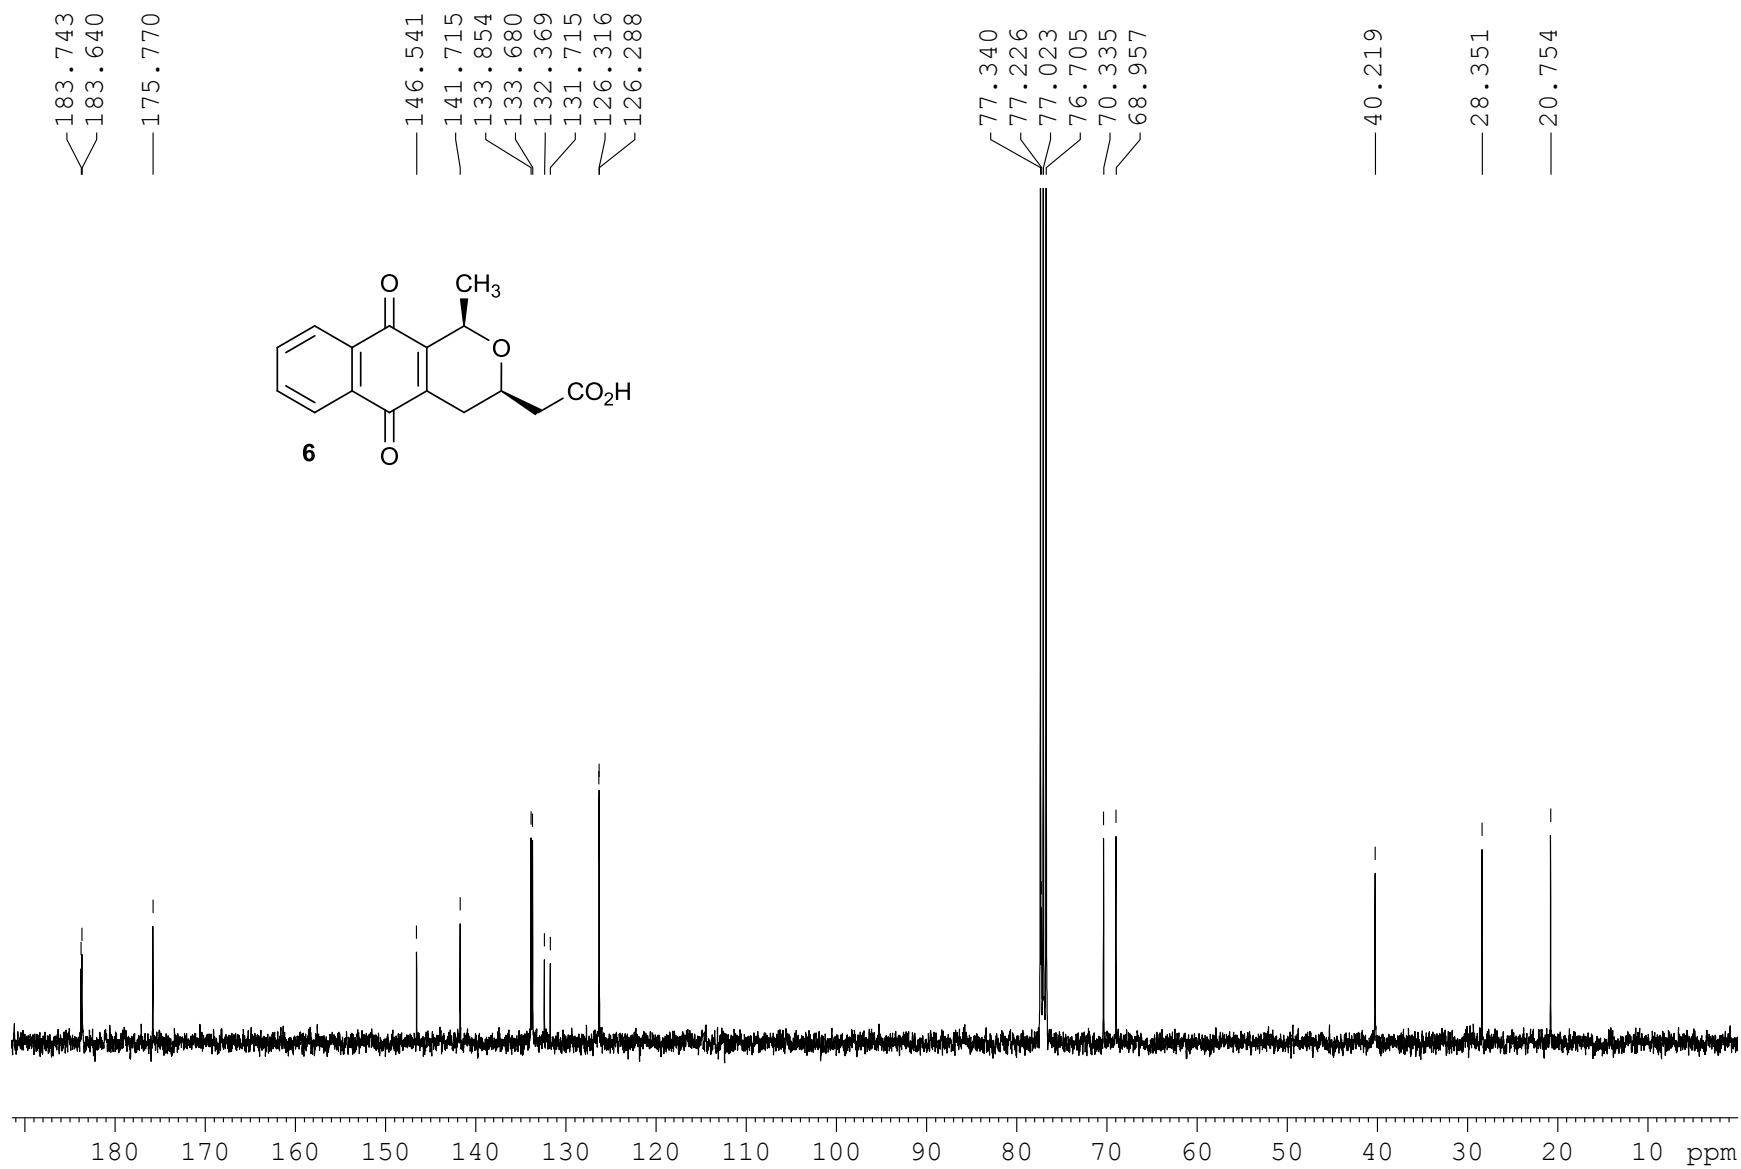

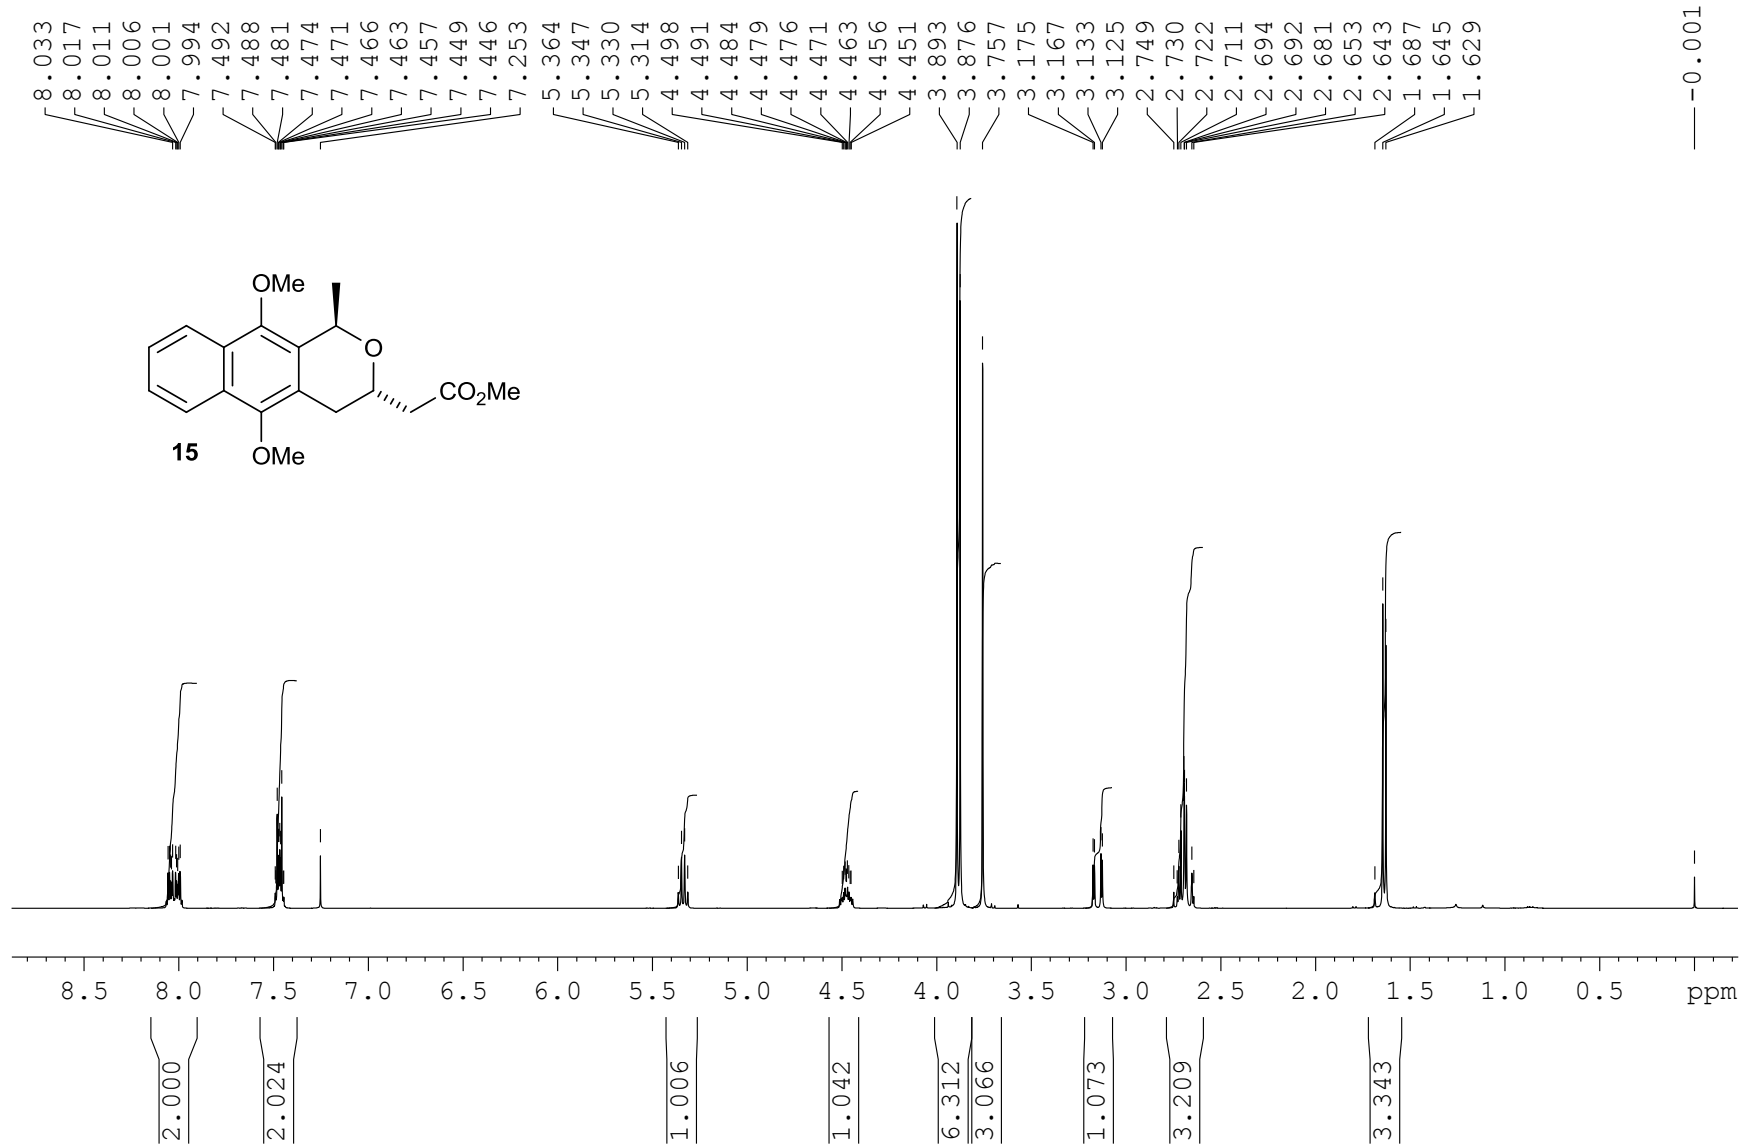

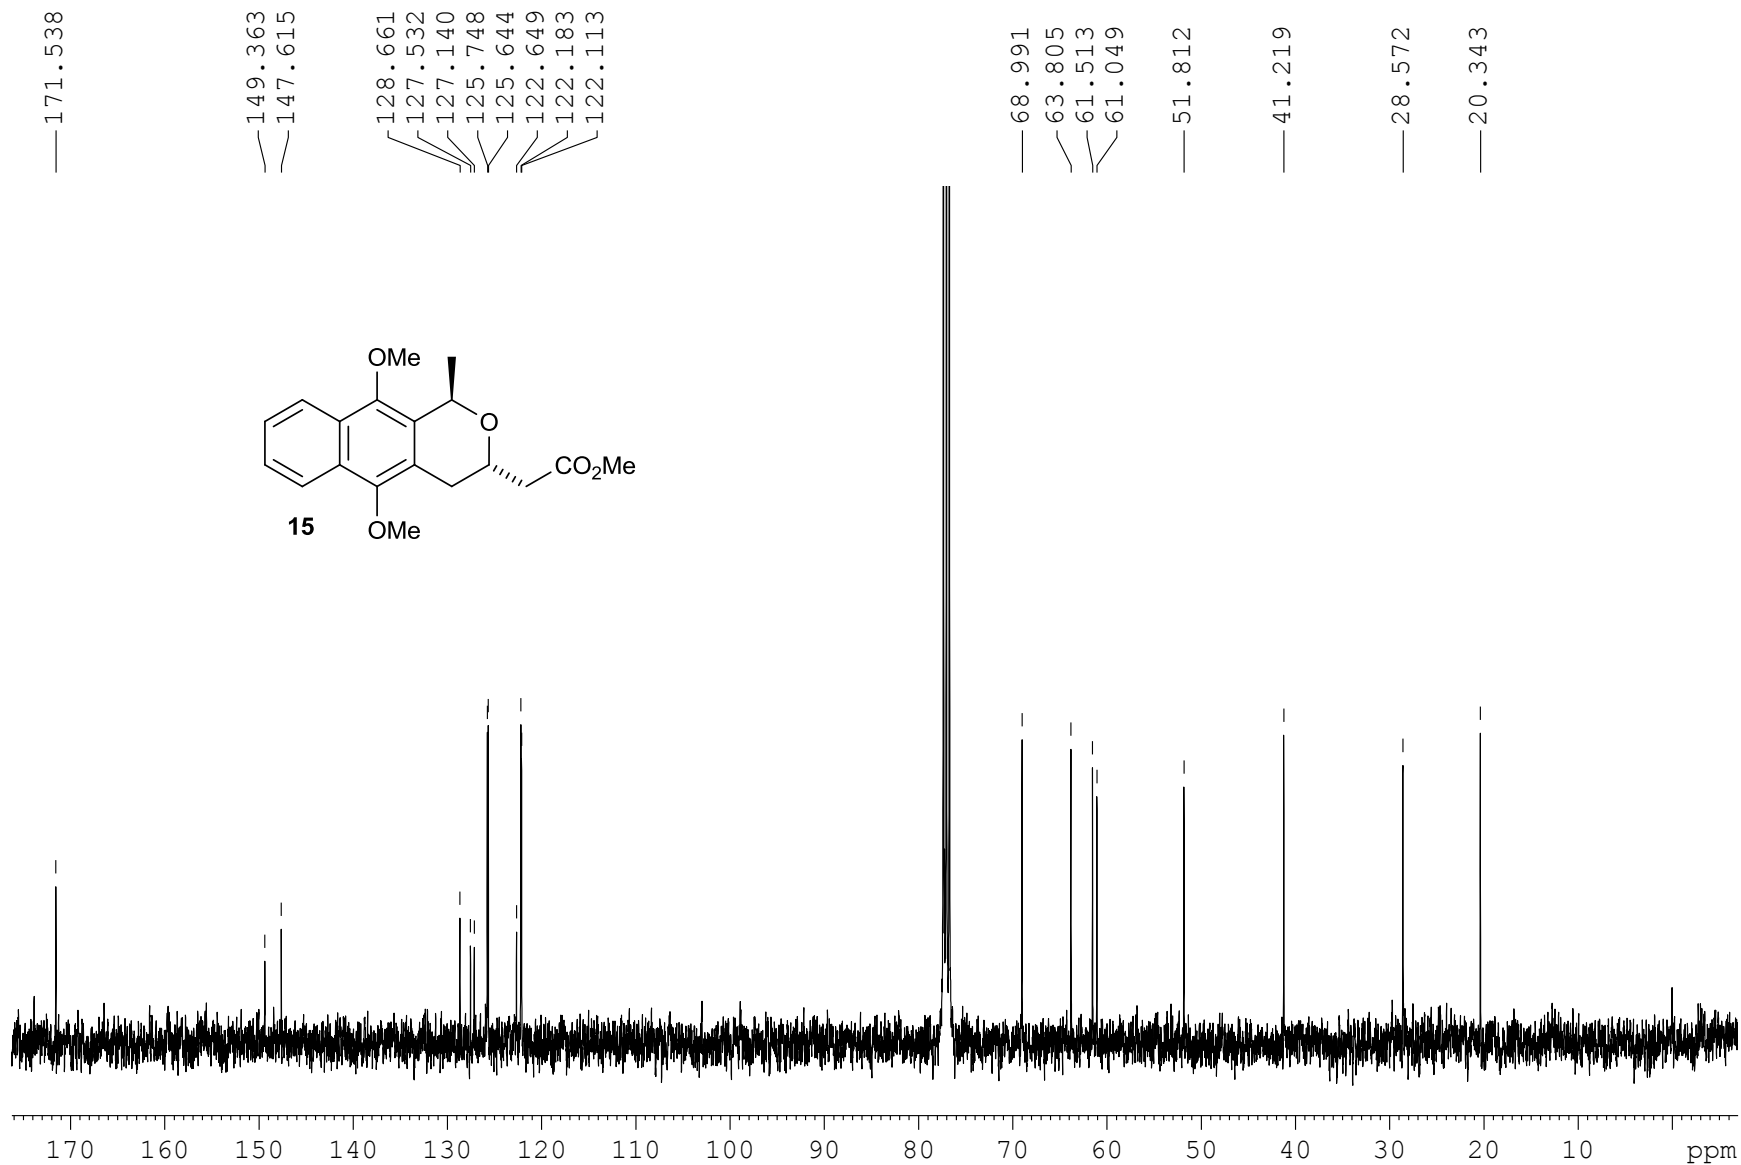

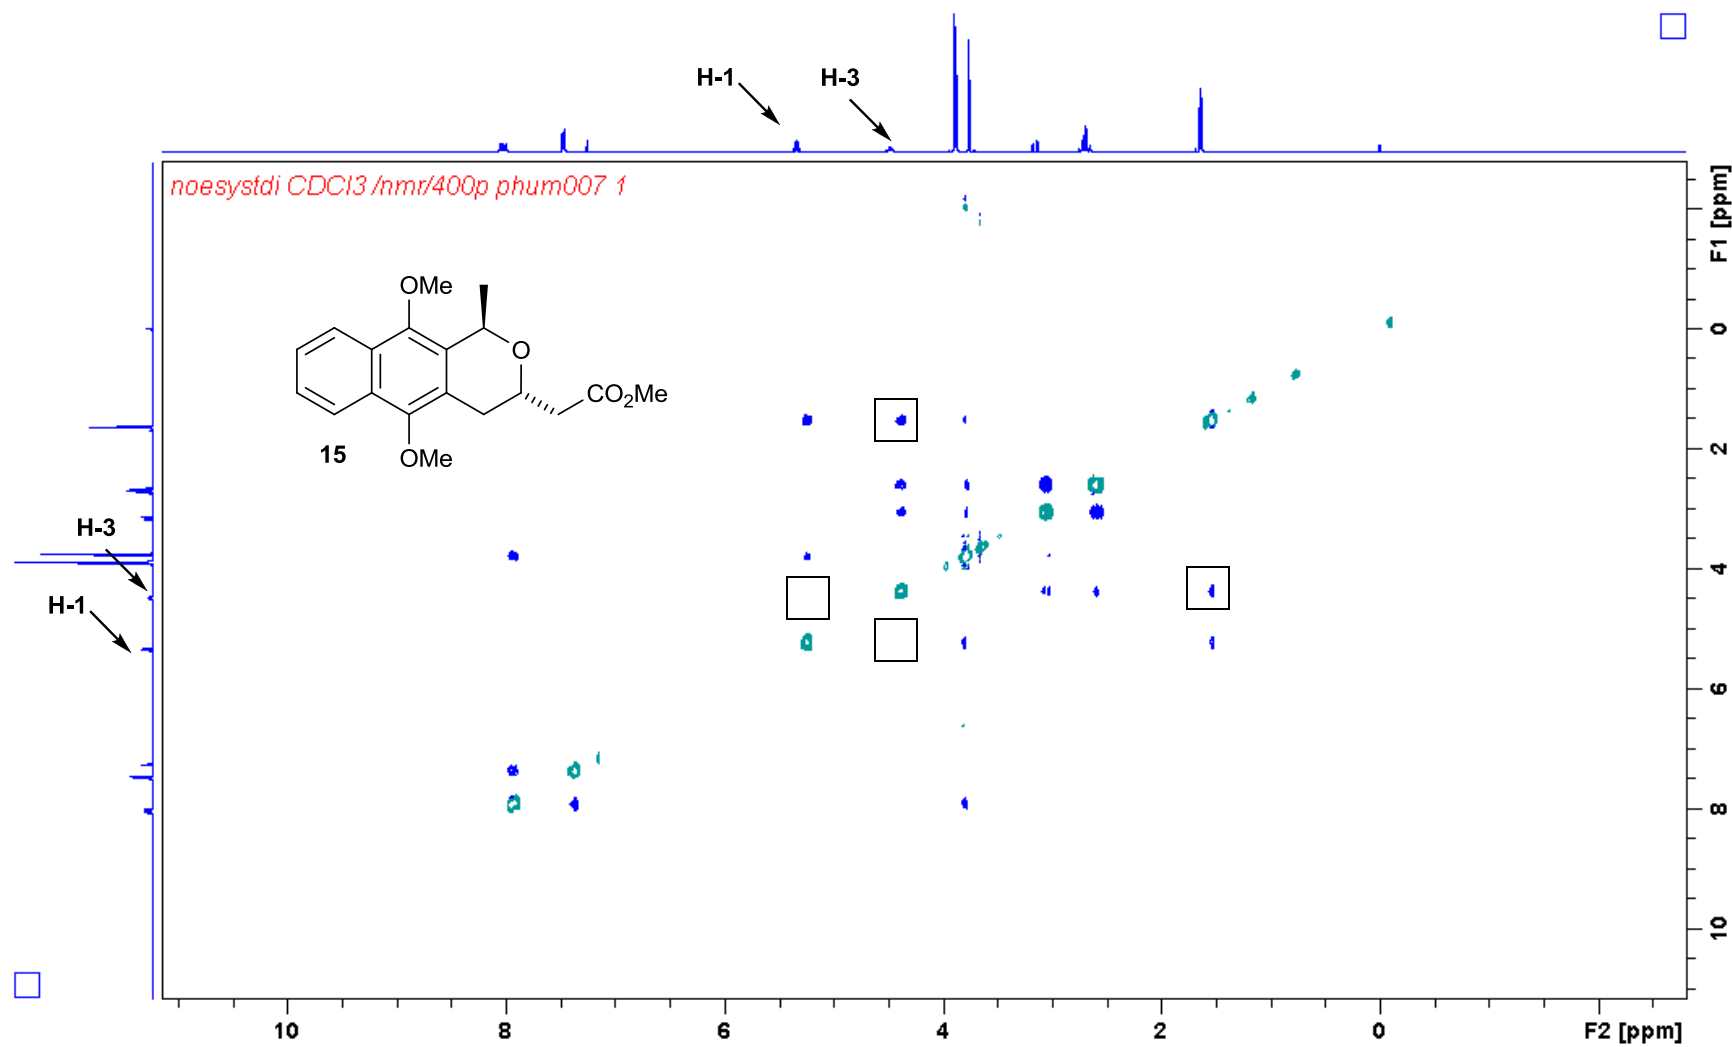

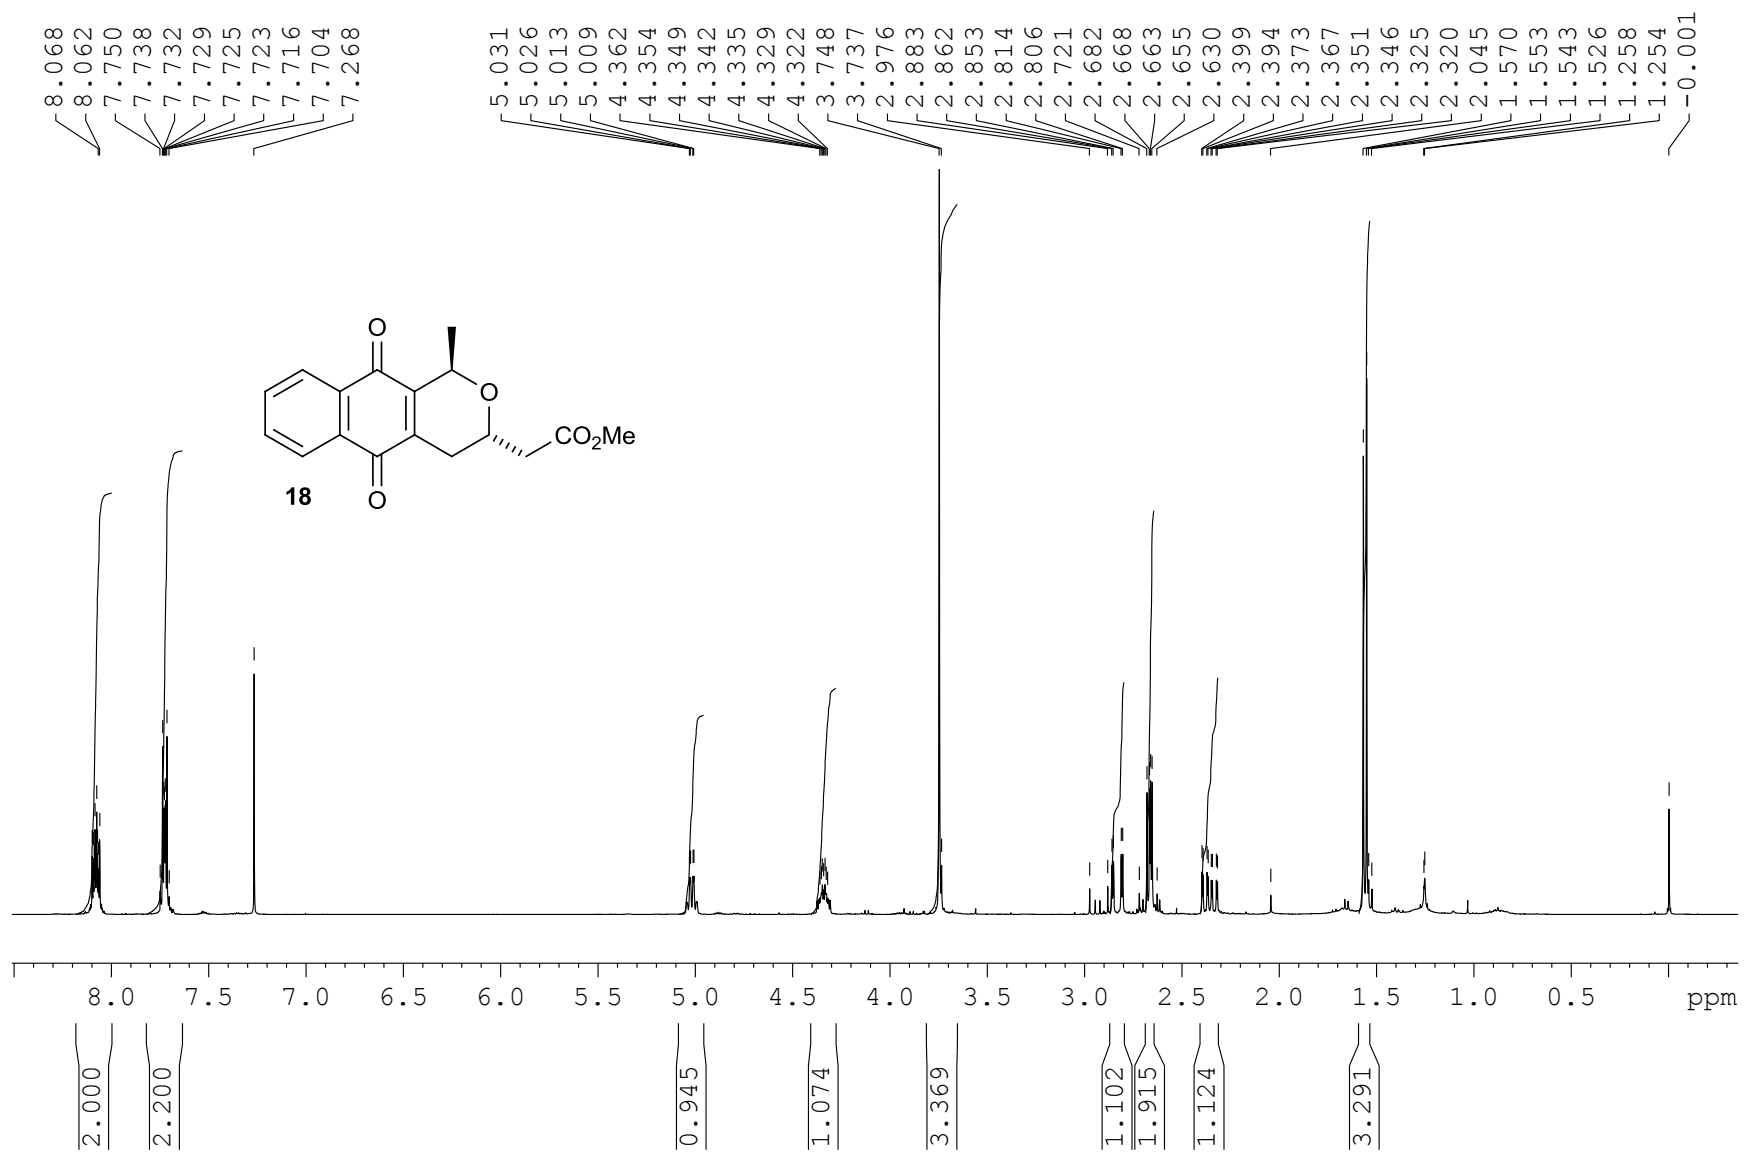

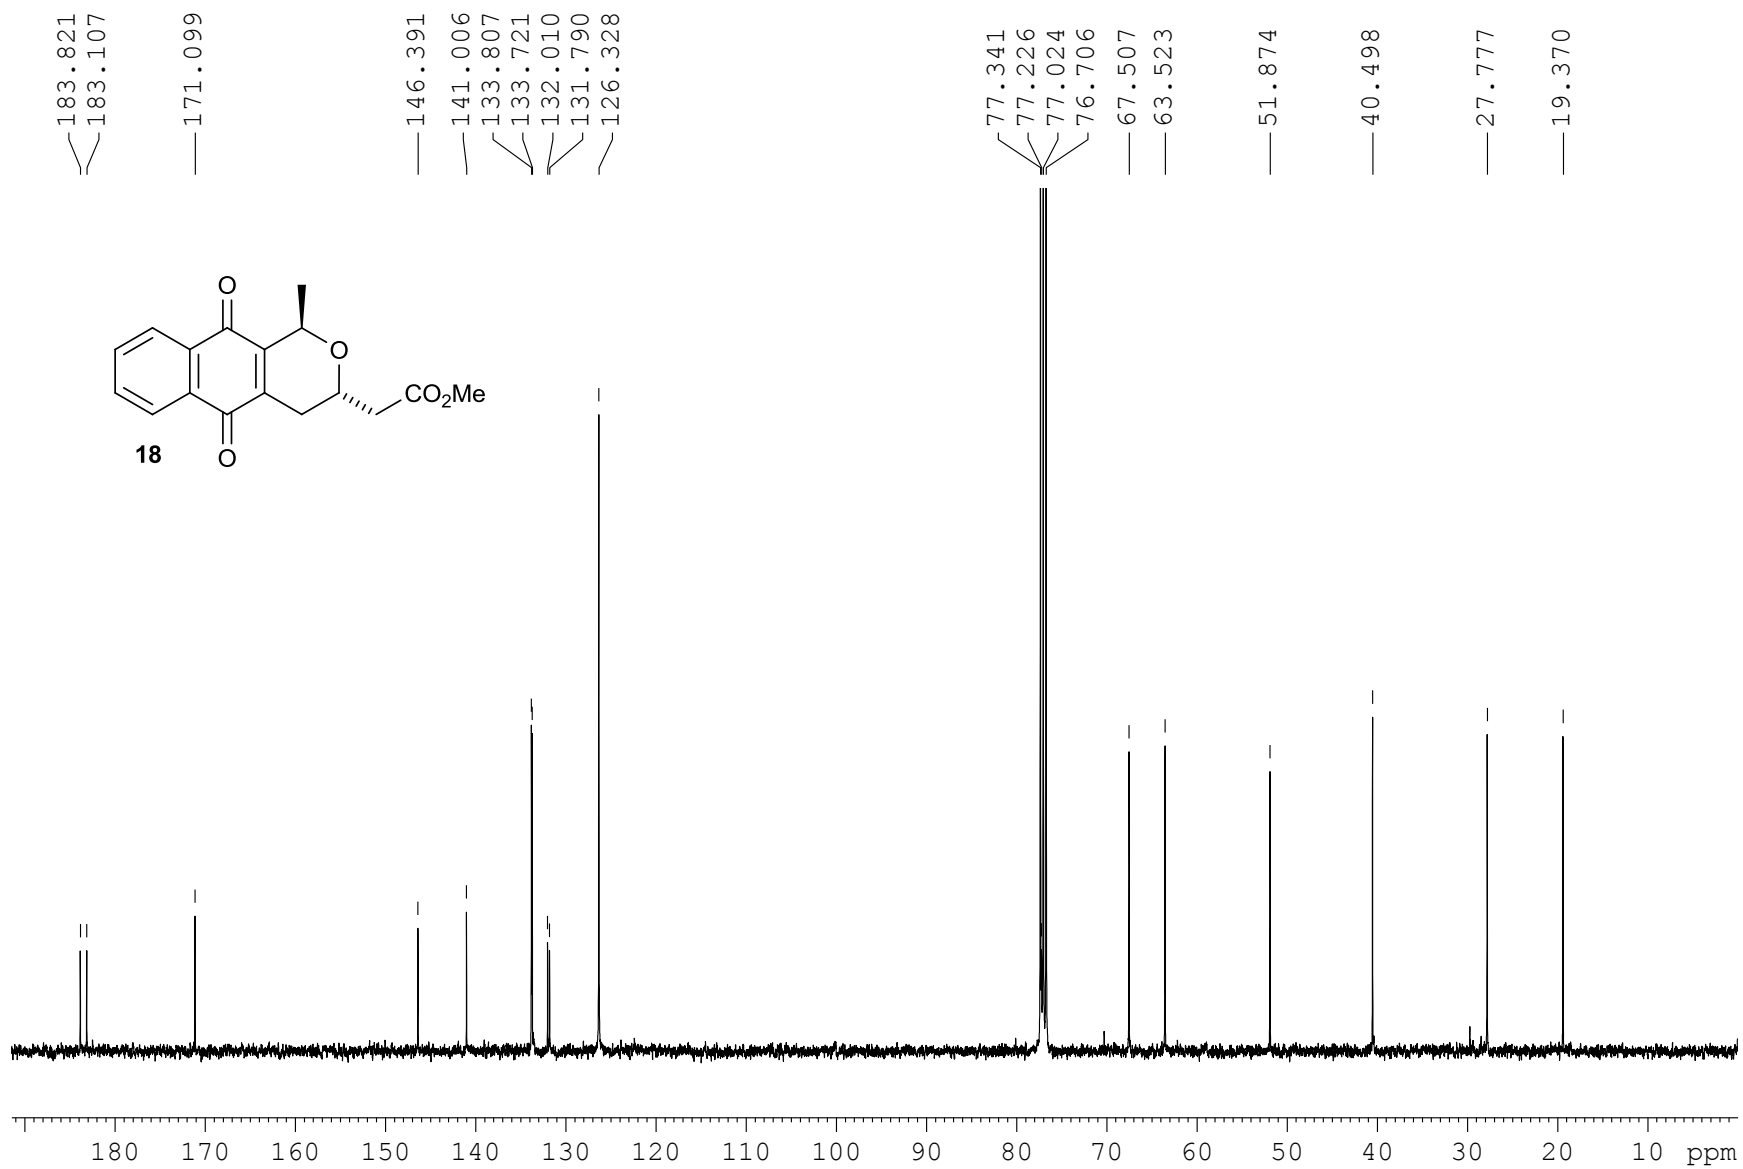

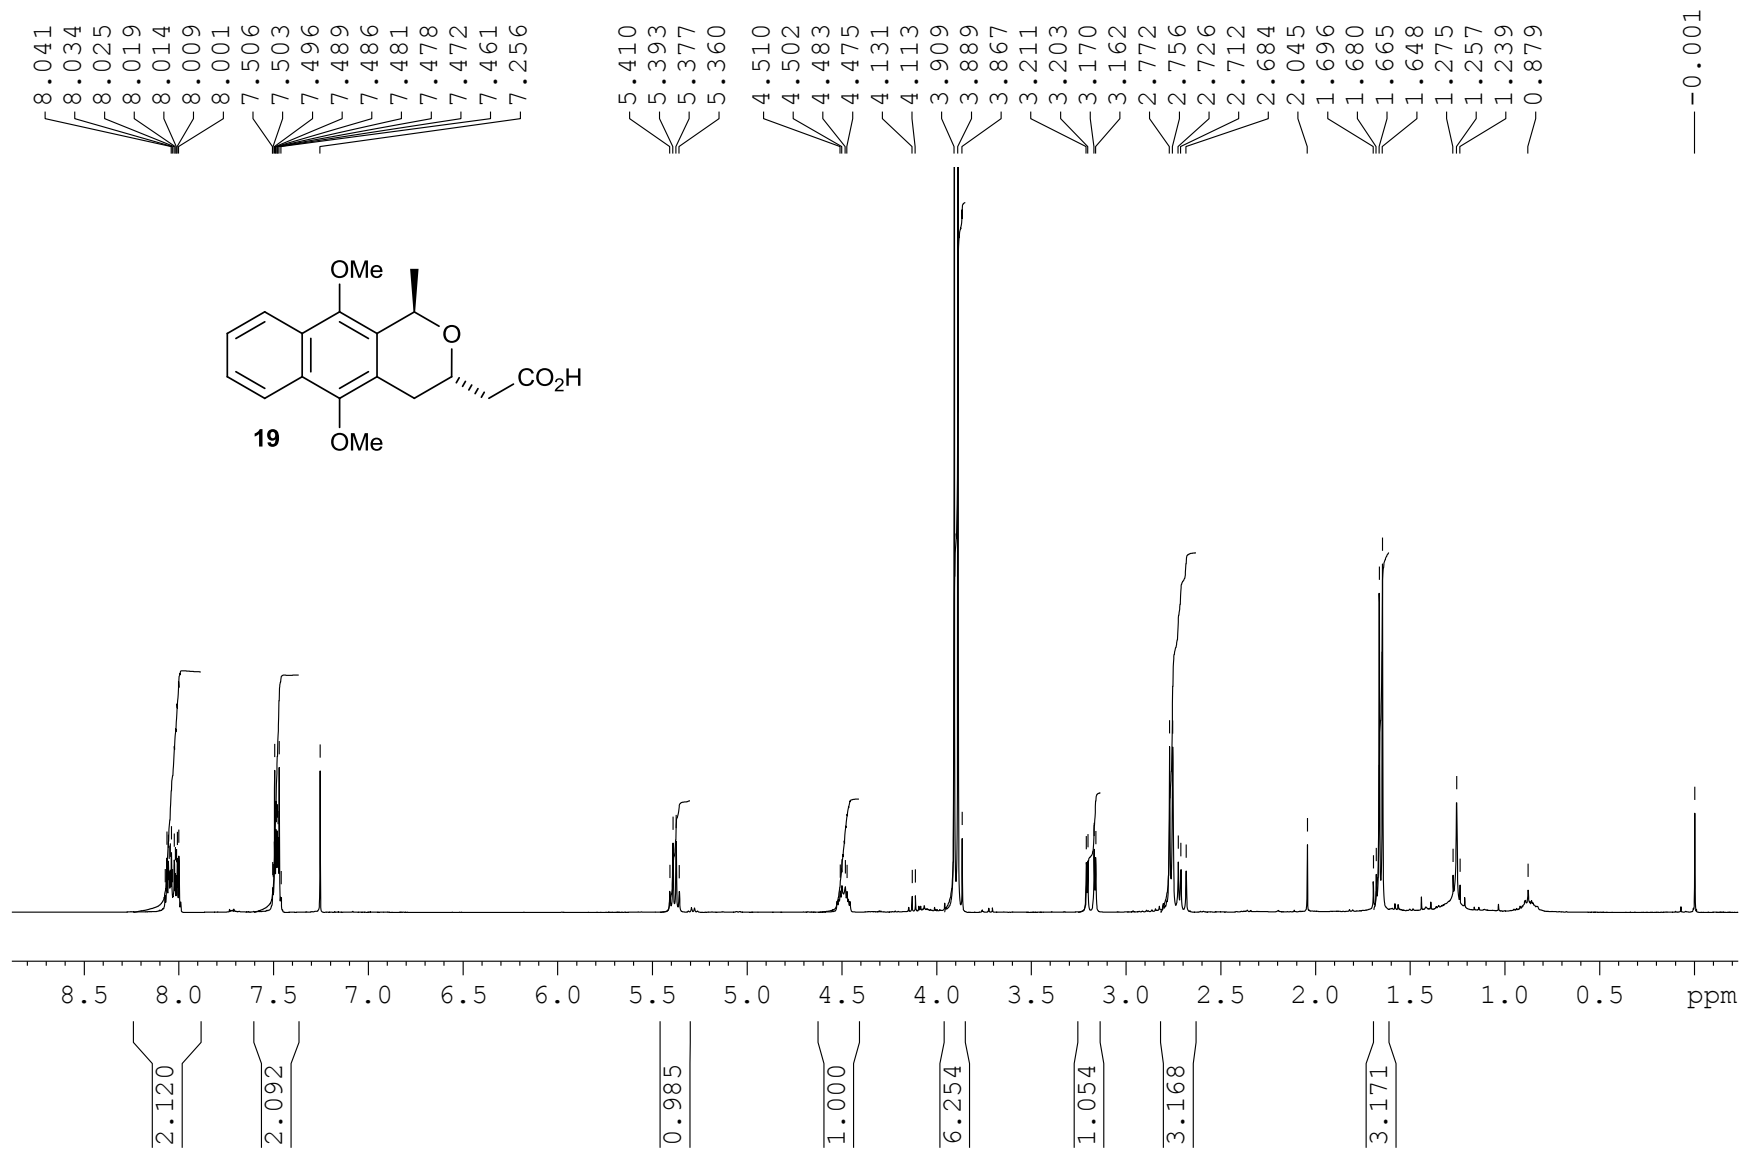

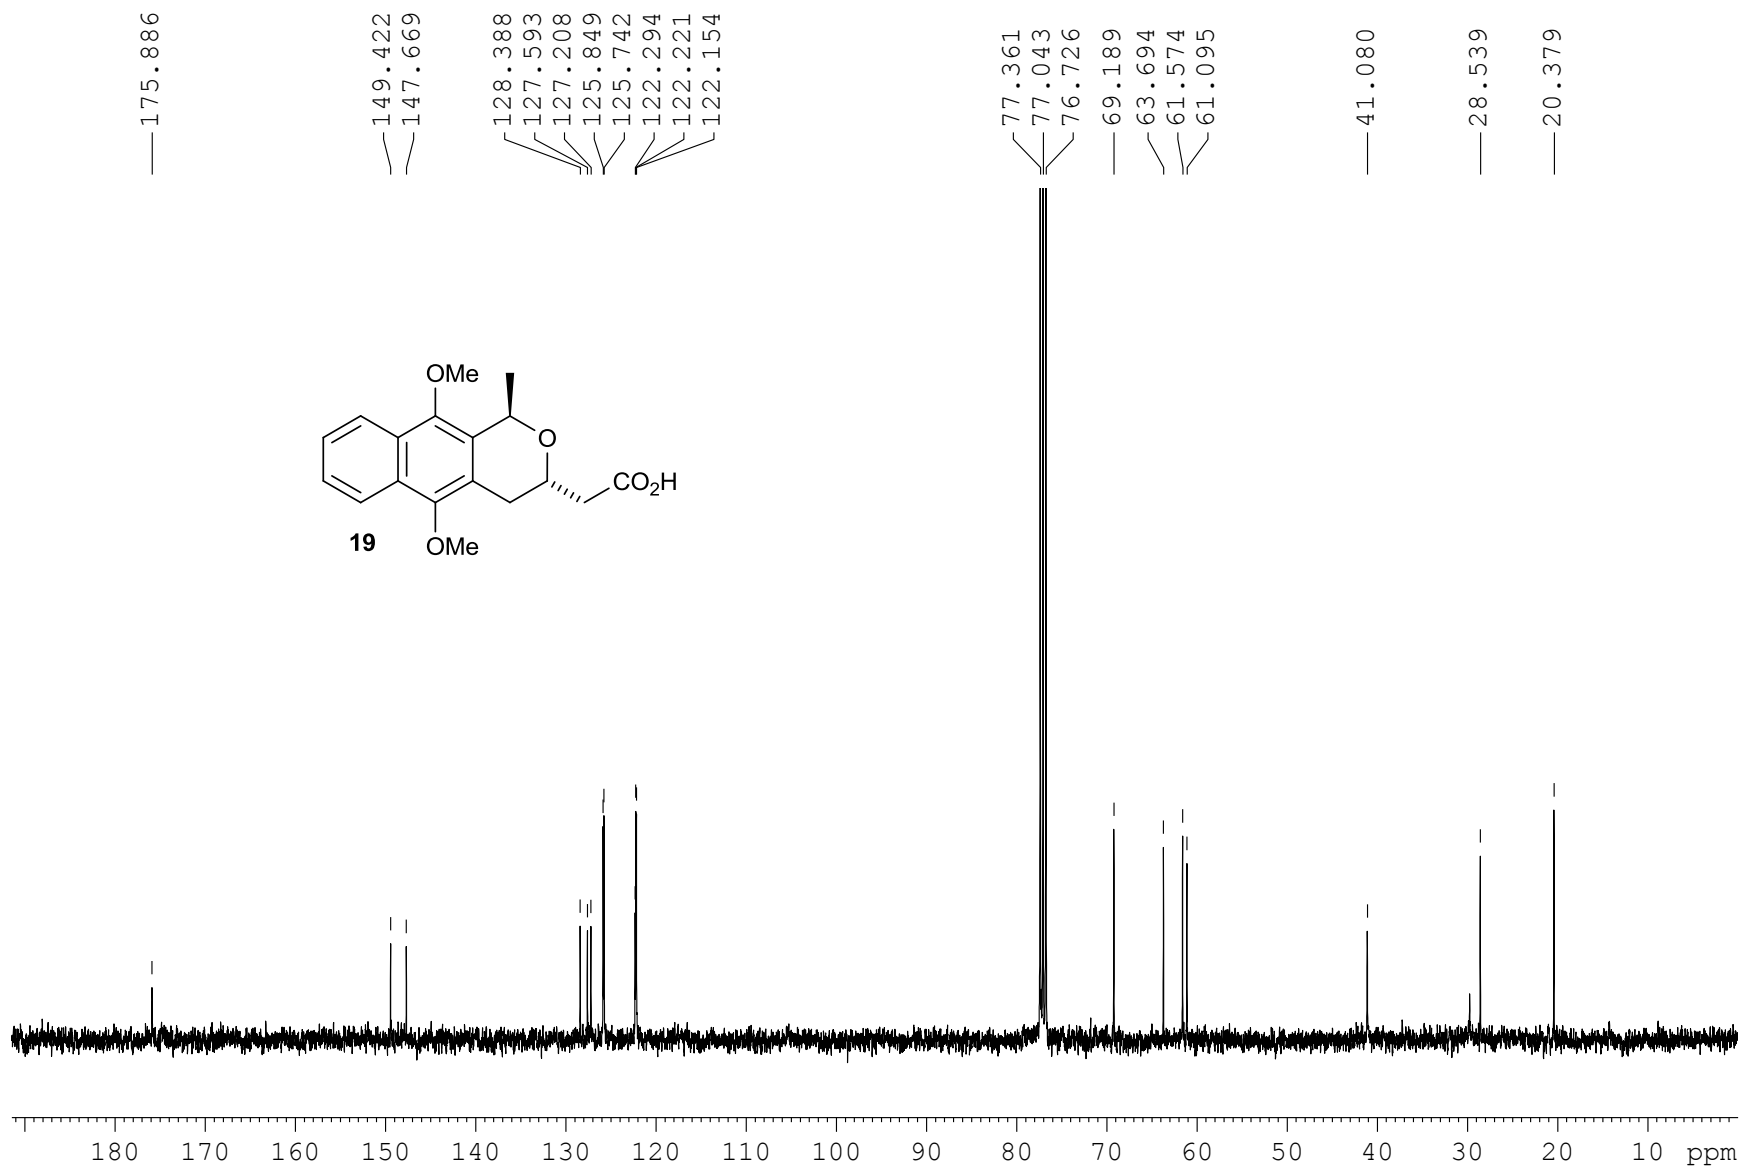



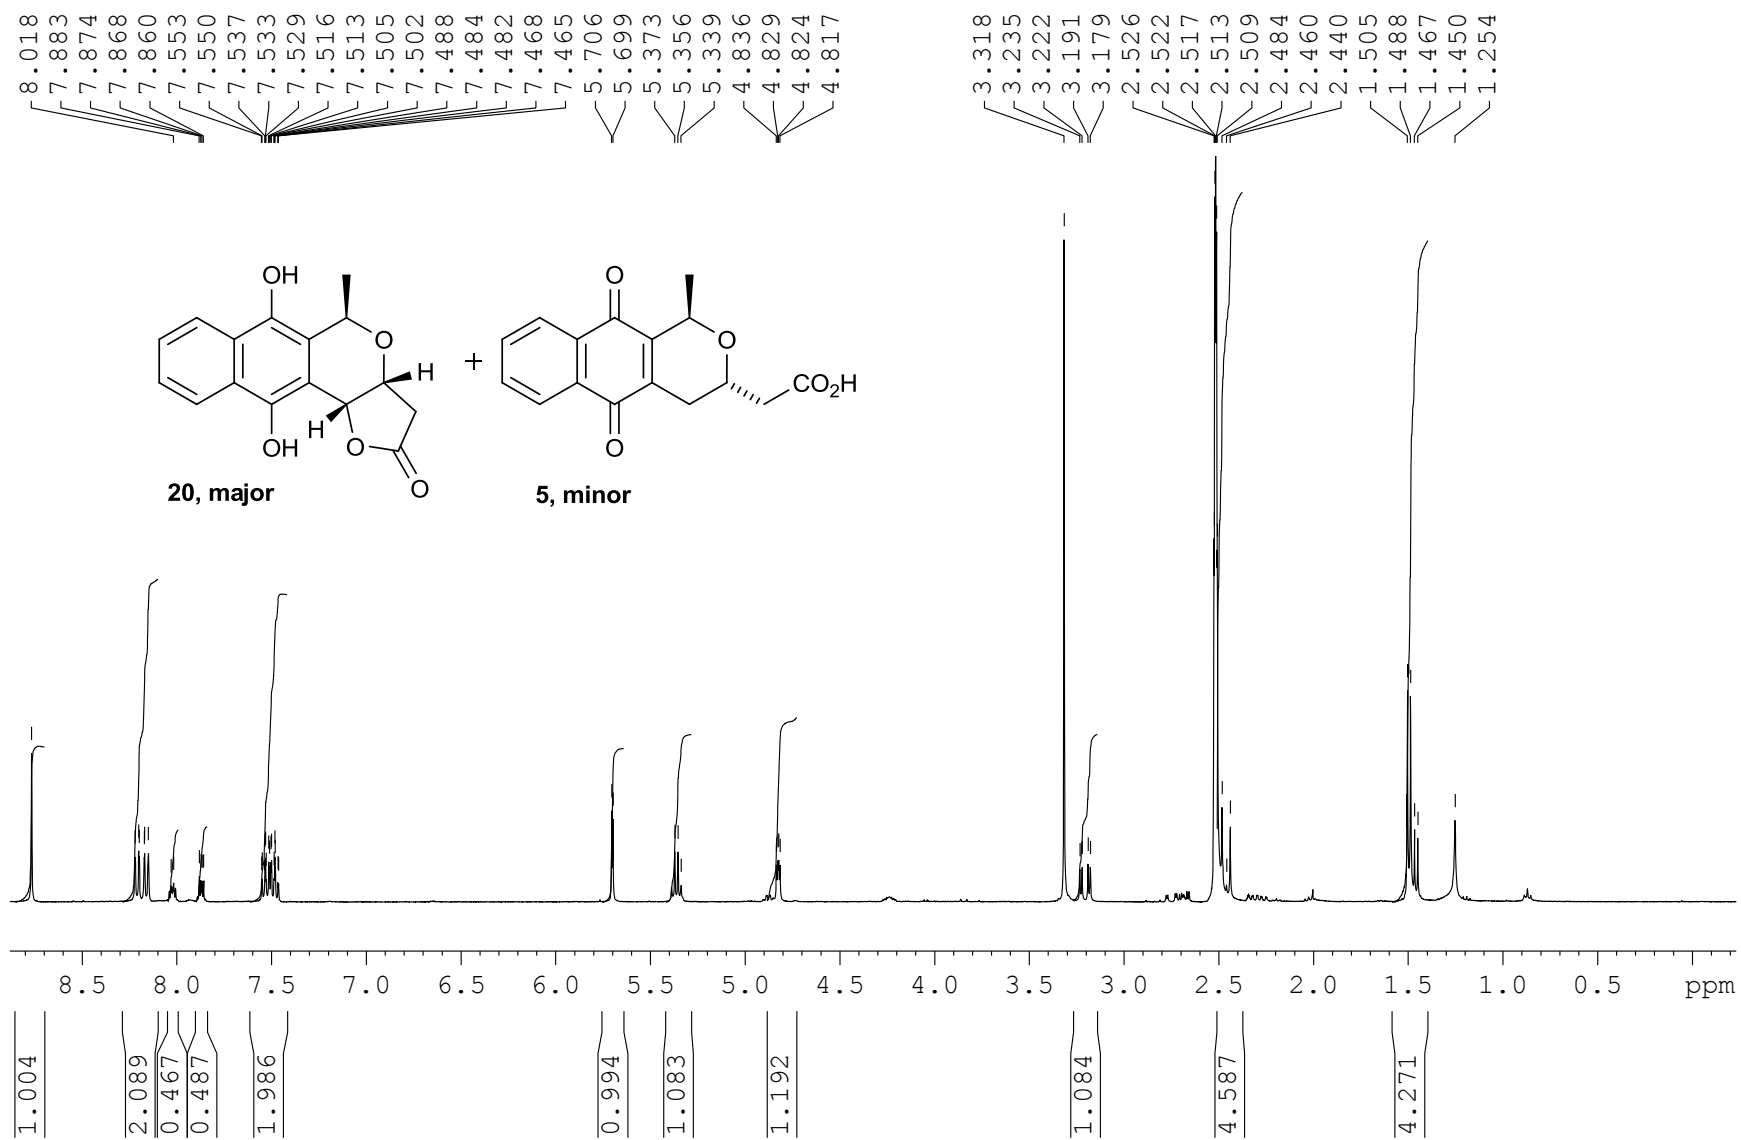

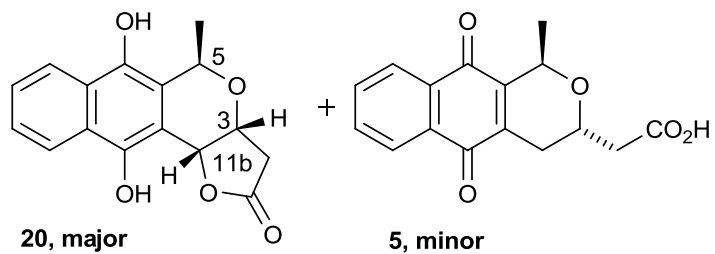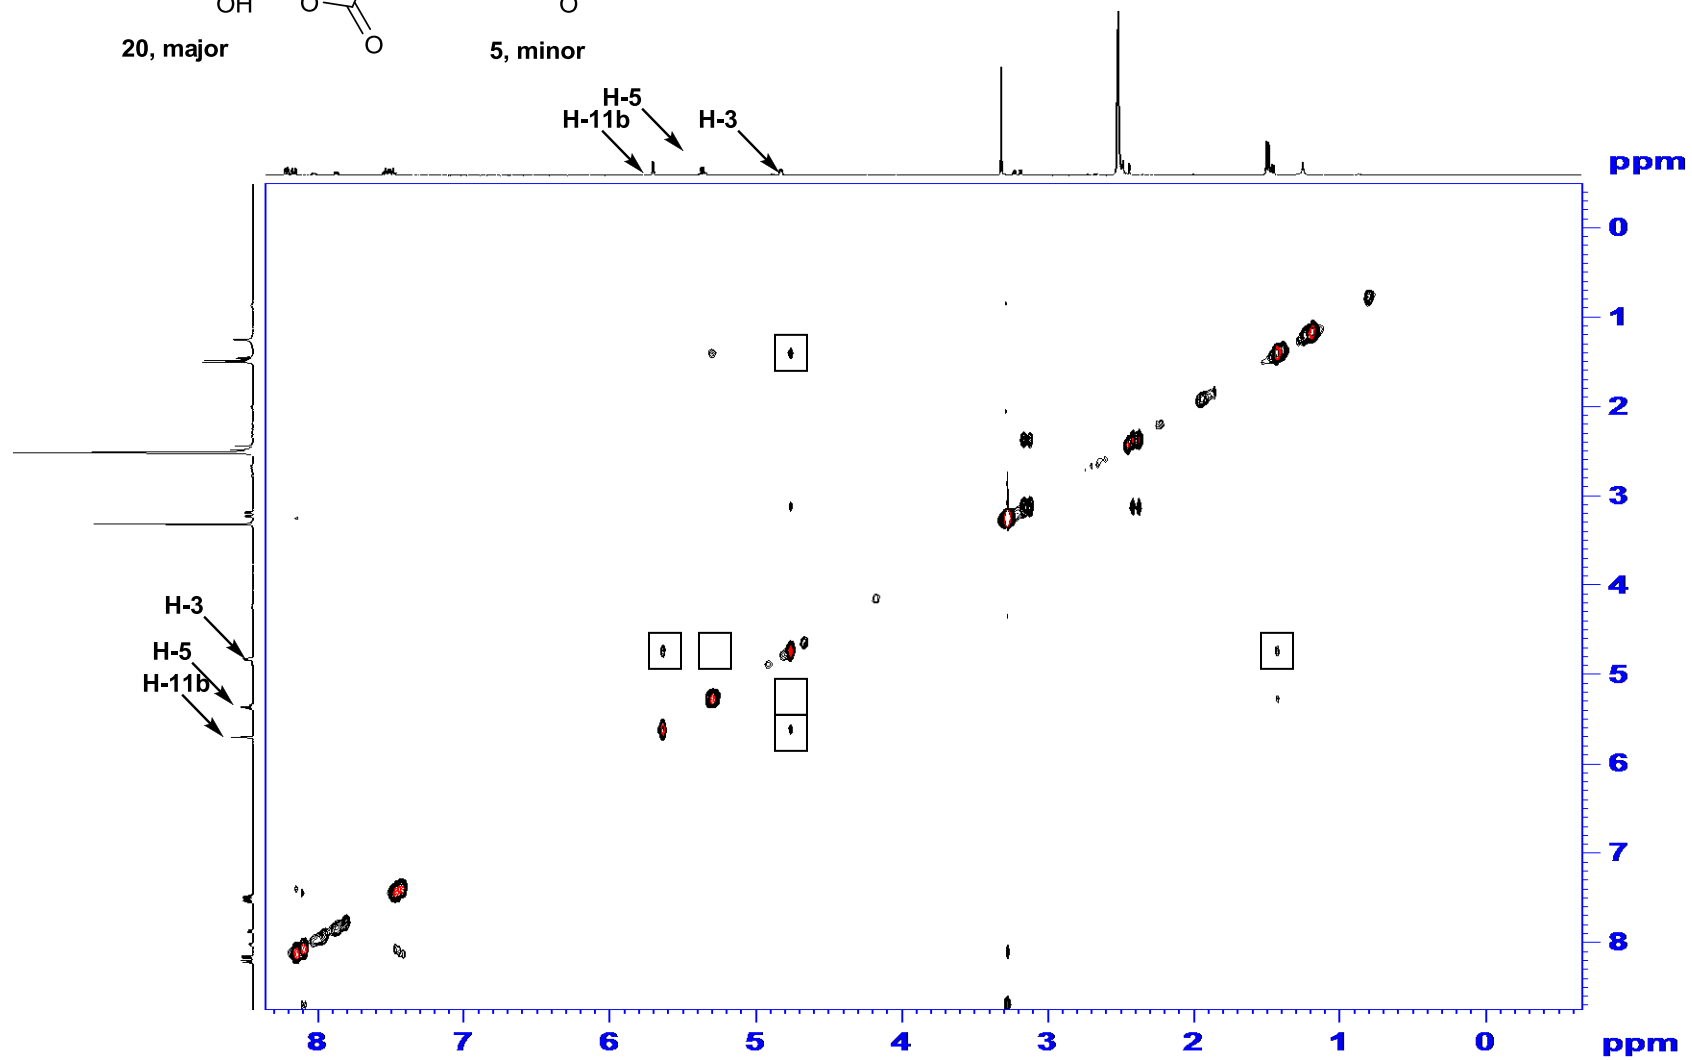

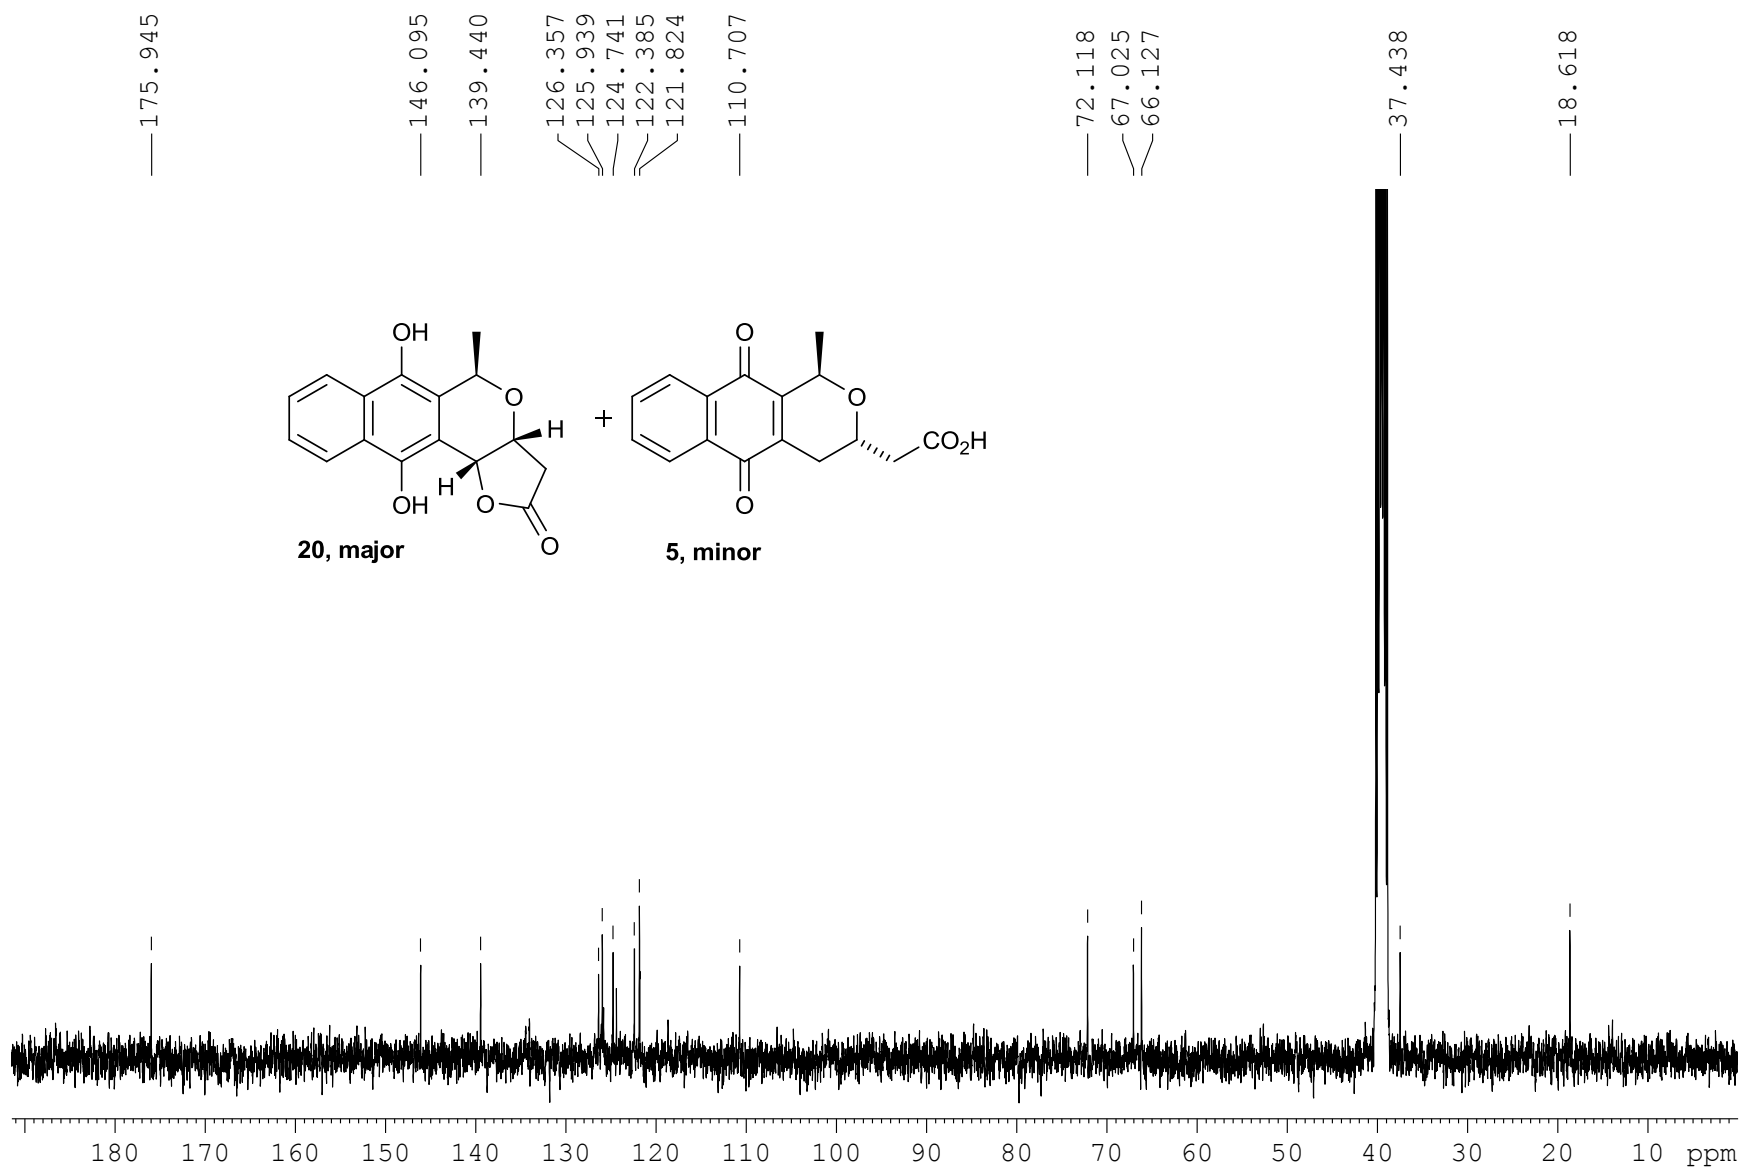

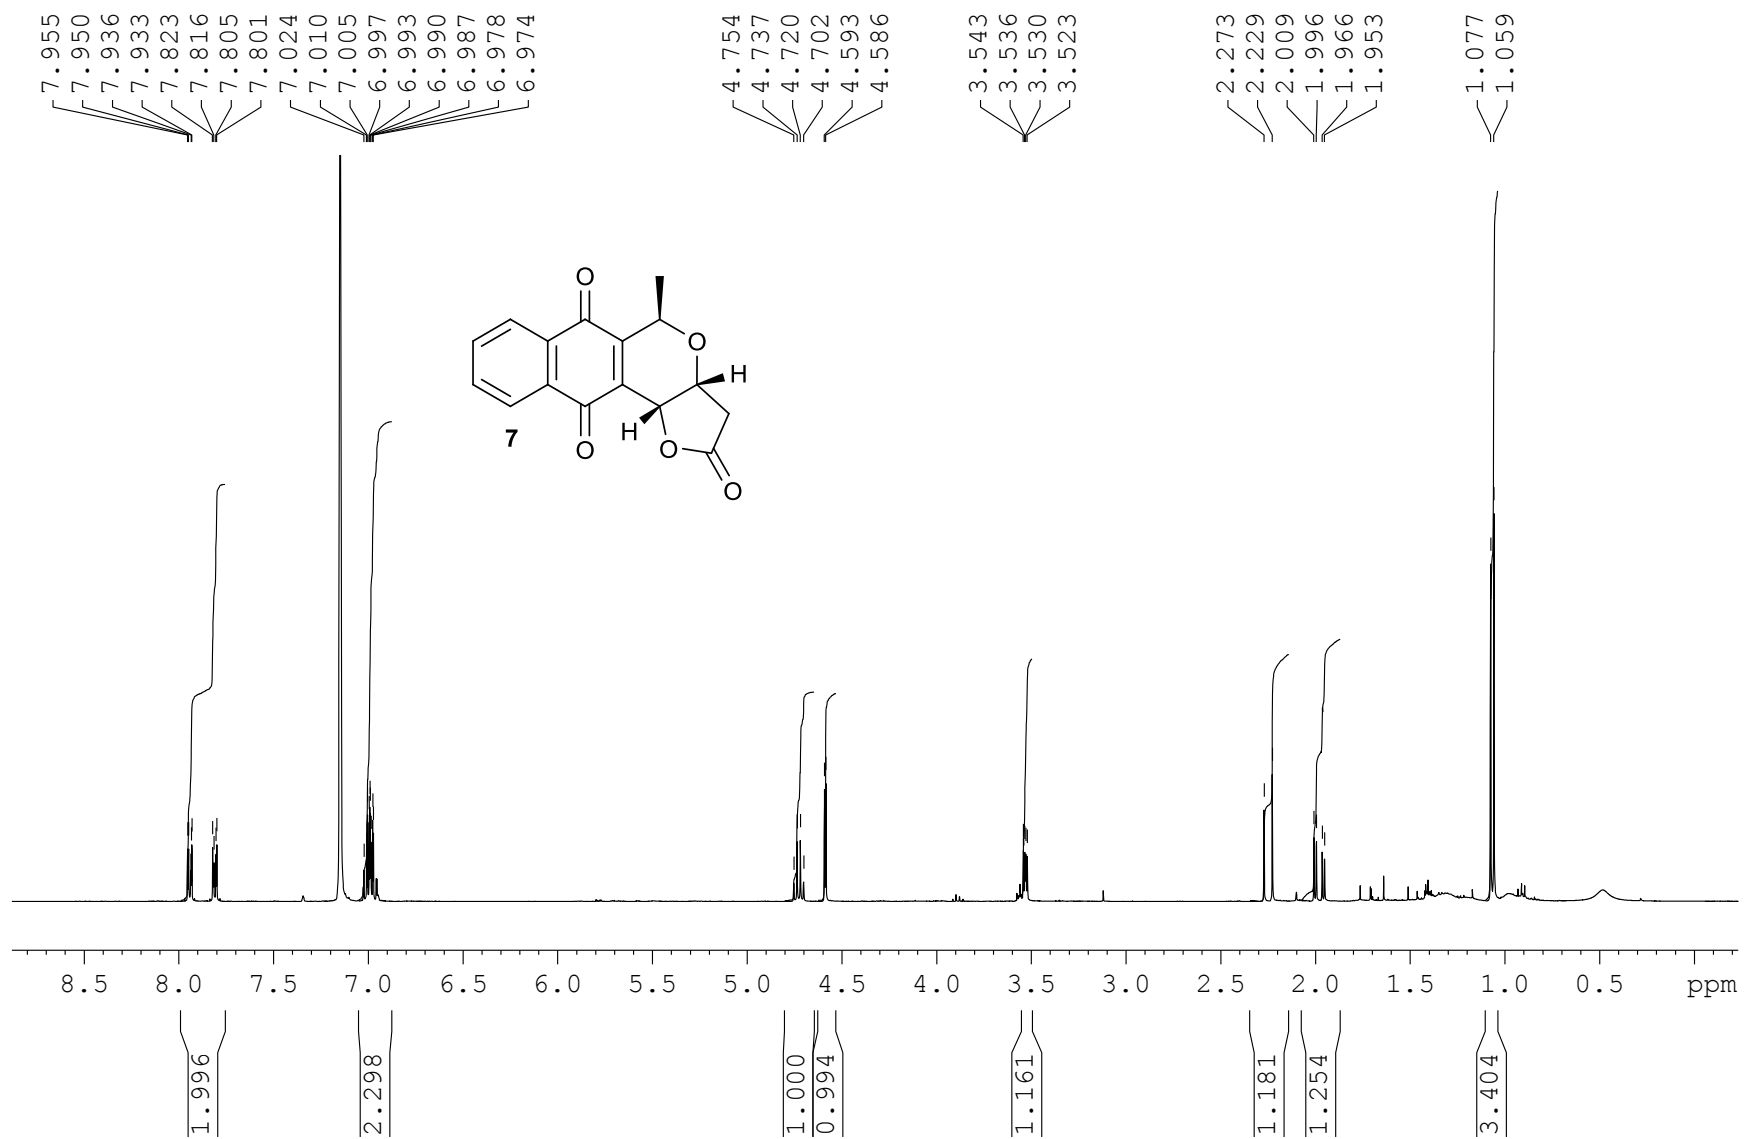

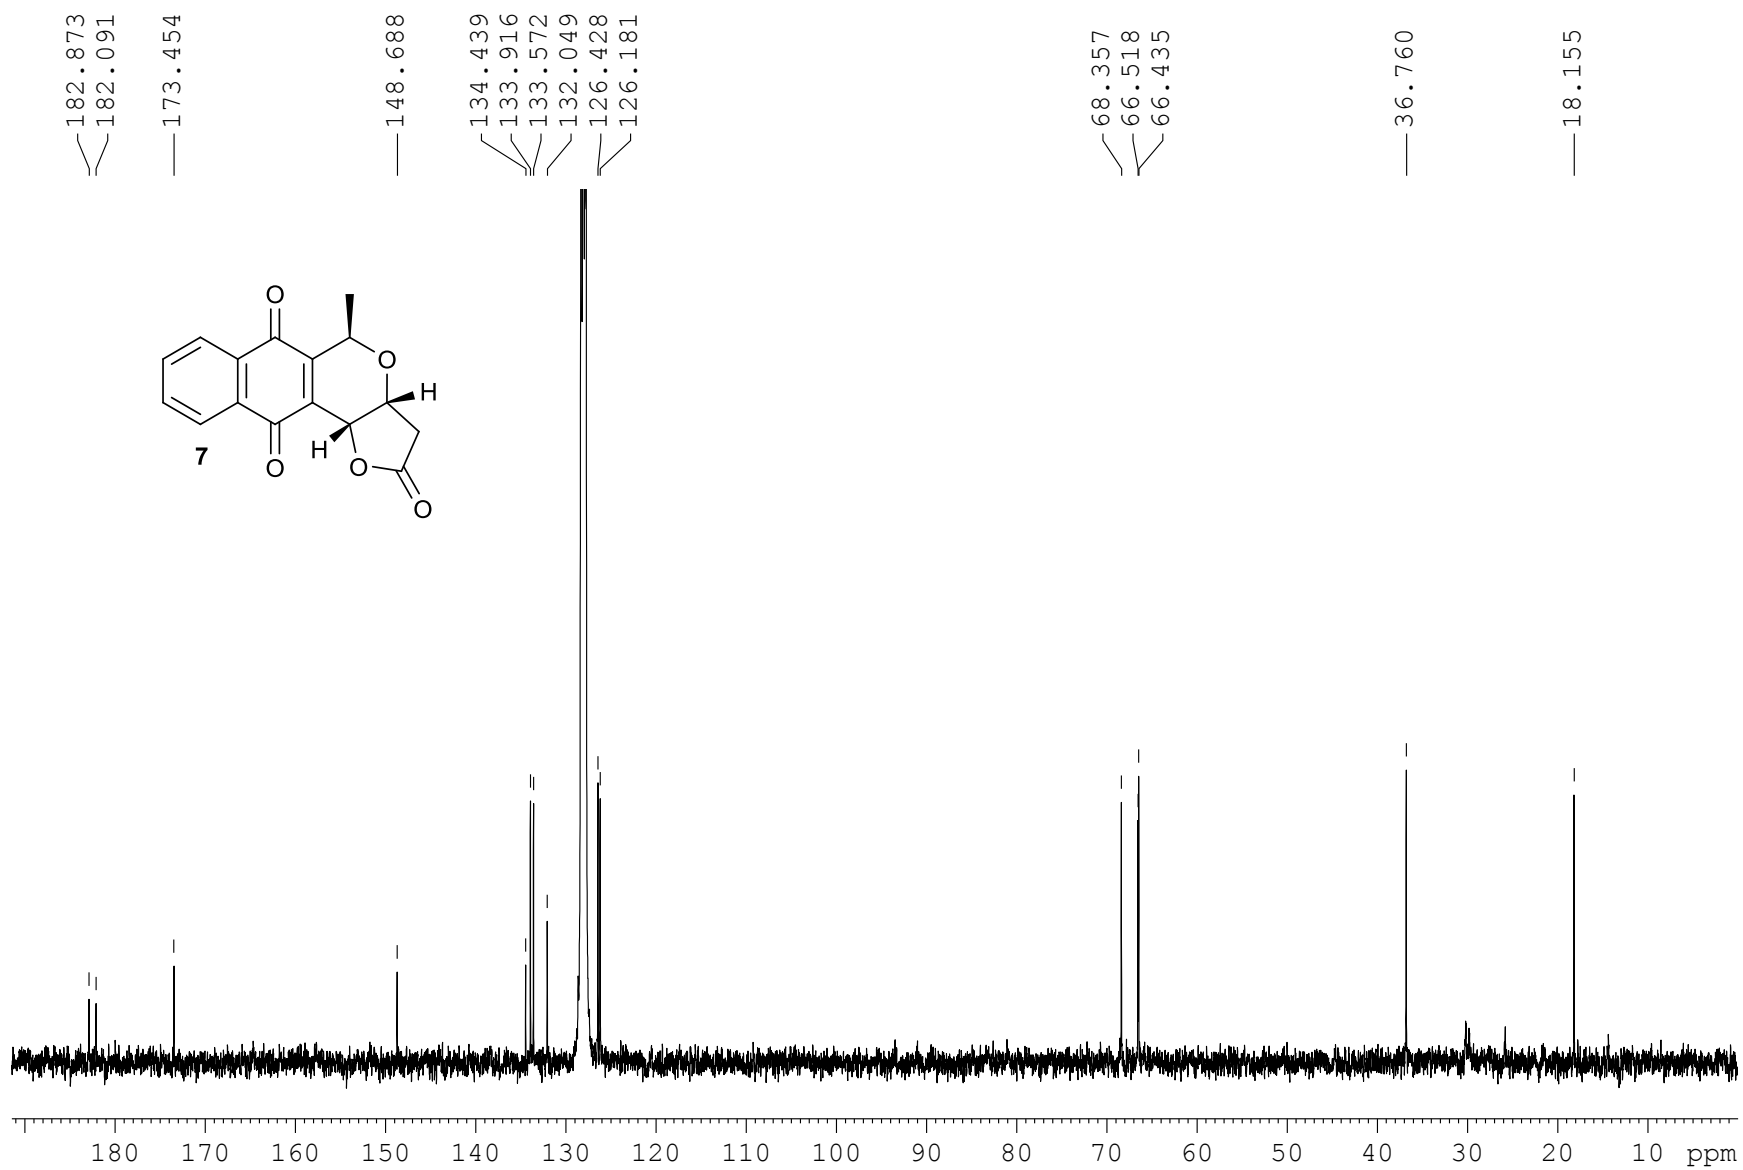

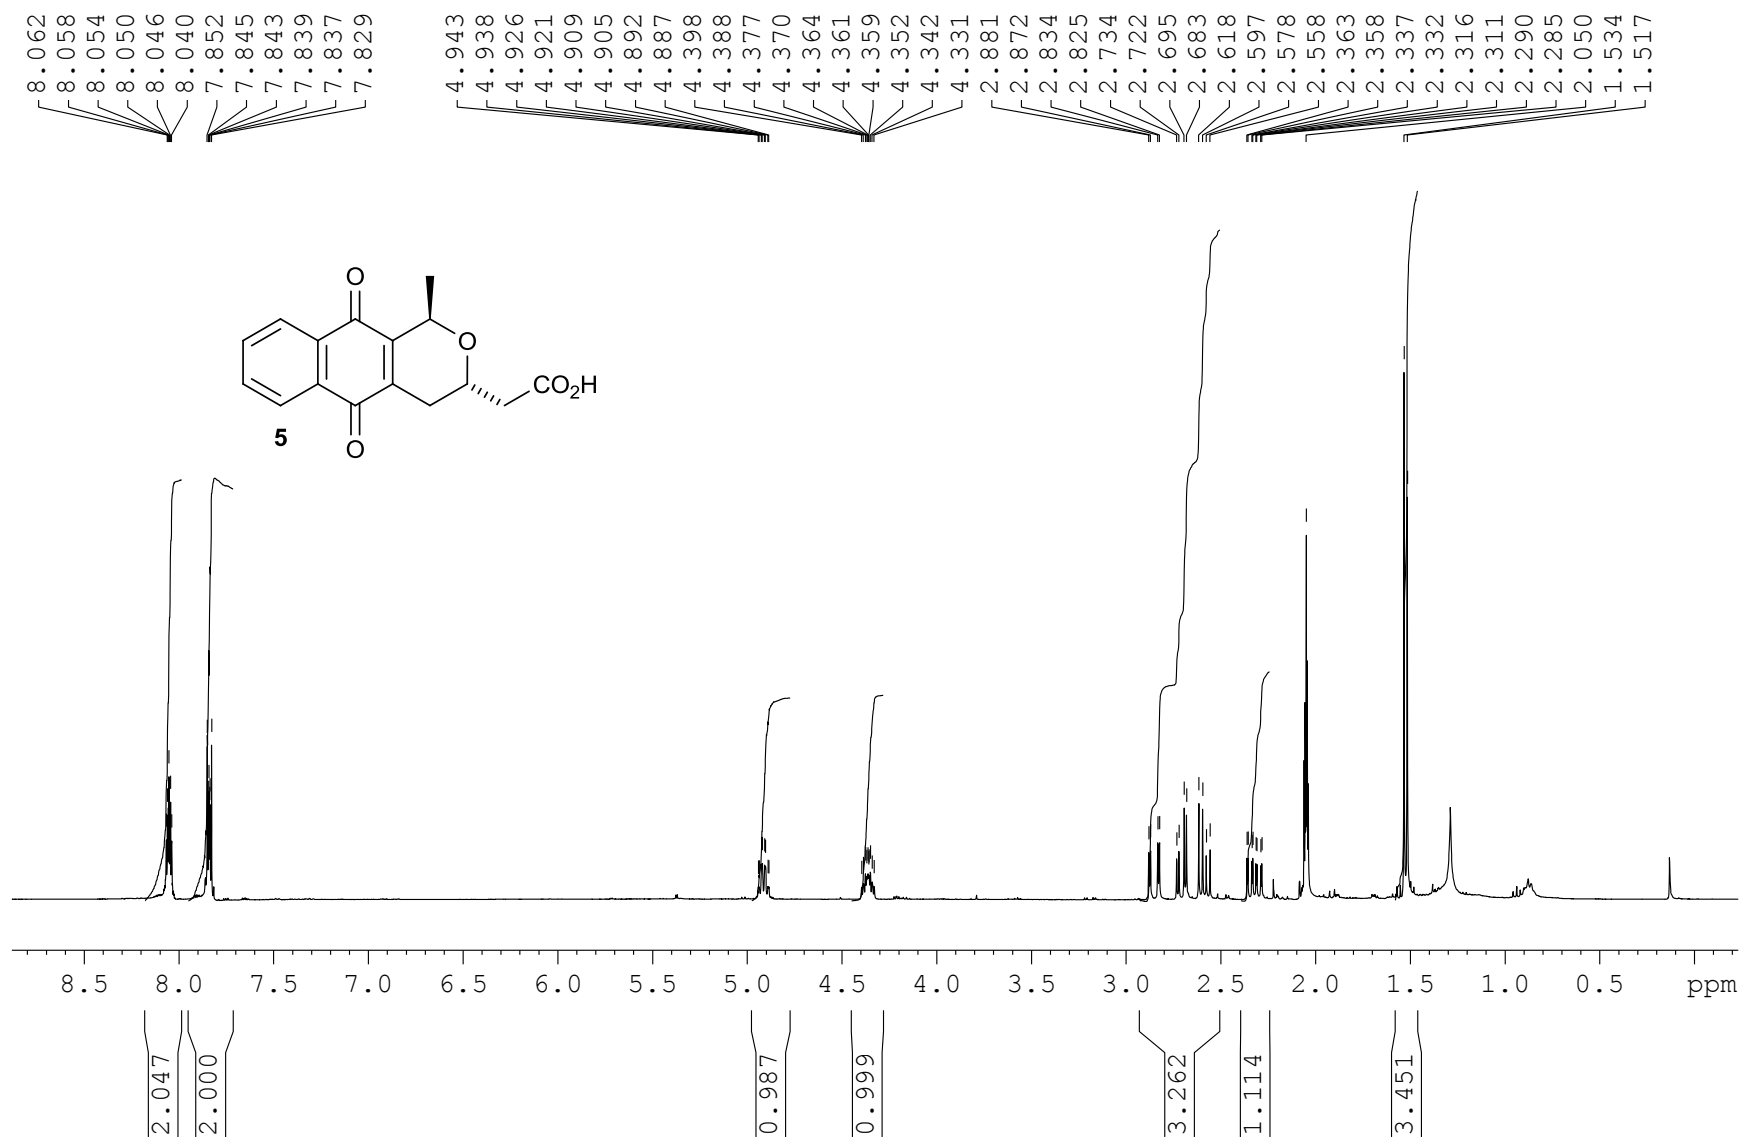

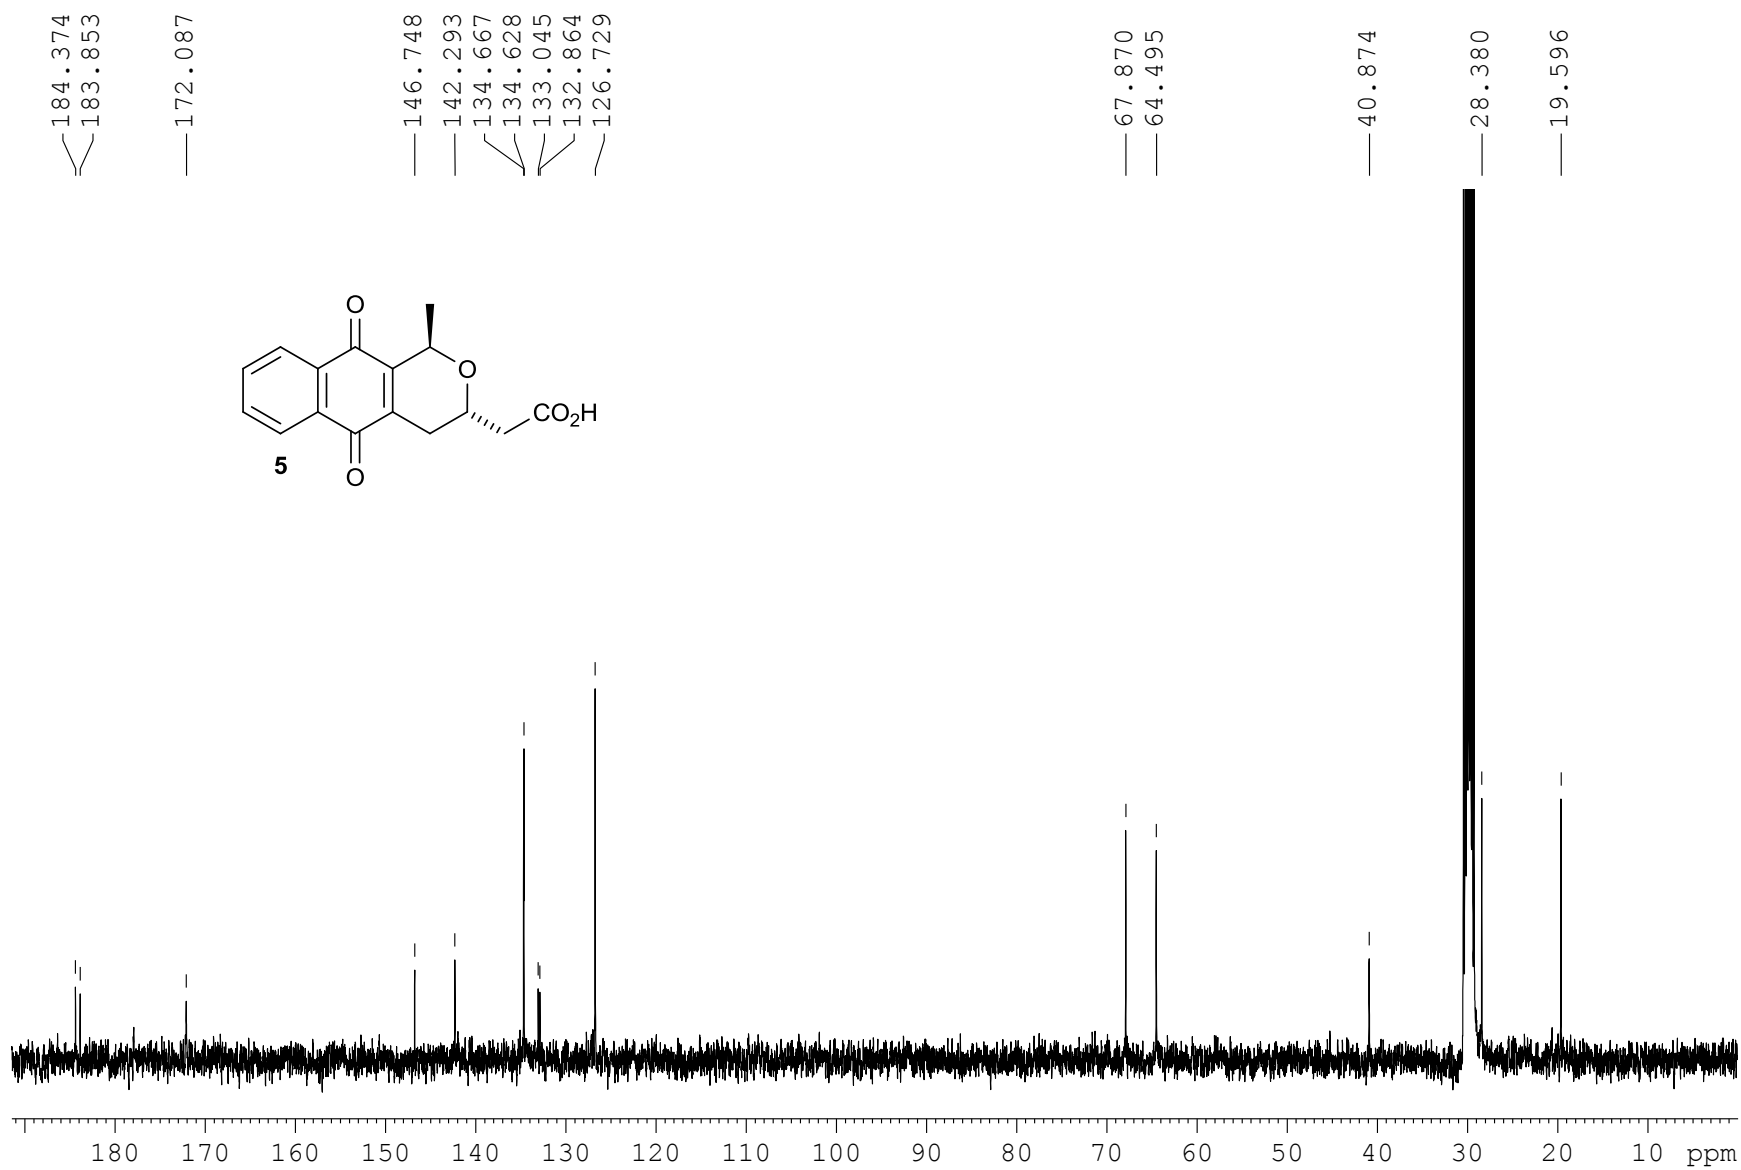

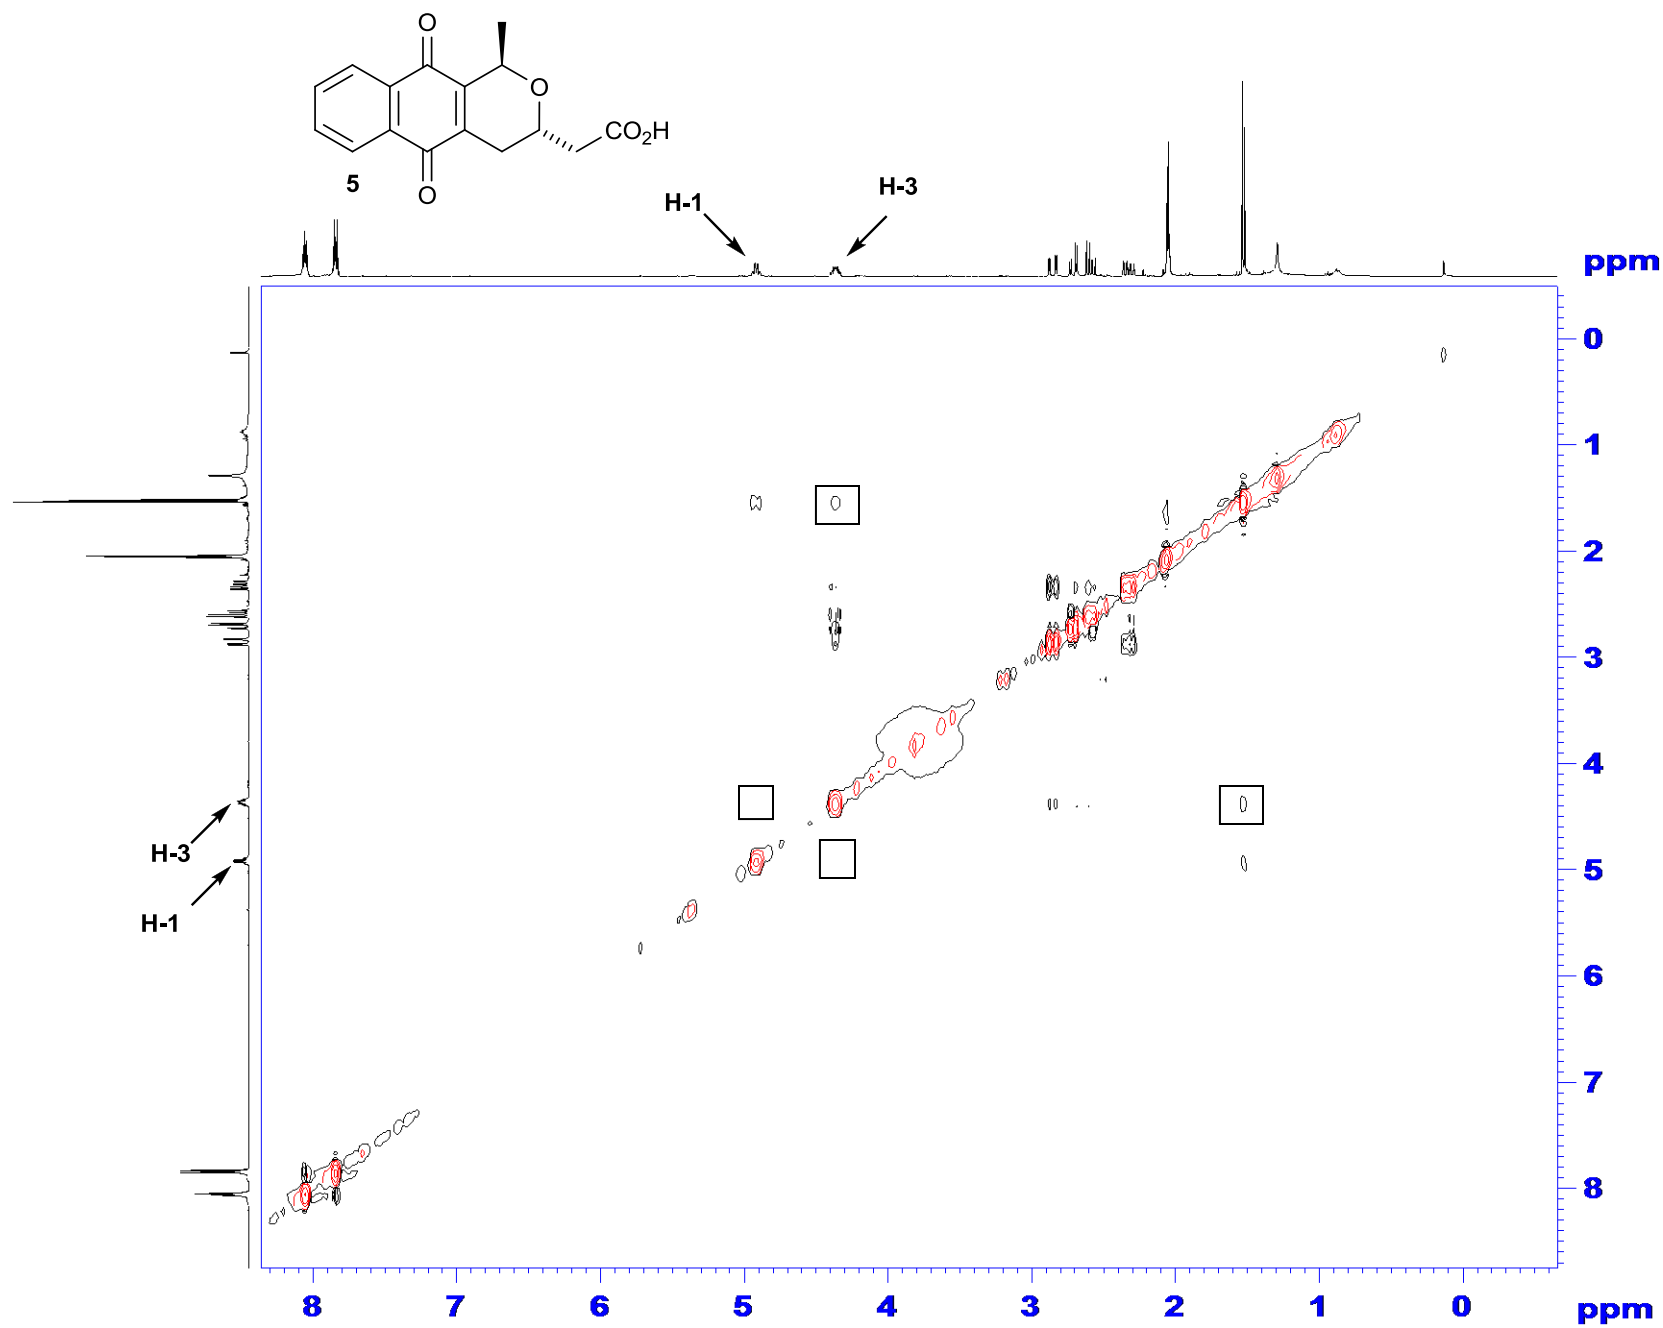



## 1 Deoxydihydrokalfungin IC 90 10 THF rac 5

|                  |                                          |                   |          |
|------------------|------------------------------------------|-------------------|----------|
| Sample Name:     | Deoxydihydrokalfungin IC 90 10 THF rac 5 | Injection Volume: | 20.0     |
| Vial Number:     | 2                                        | Channel:          | UV_VIS_2 |
| Sample Type:     | unknown                                  | Wavelength:       | 254      |
| Control Program: | alcohol 65_35                            | Bandwidth:        | n.a.     |
| Quantif. Method: | default                                  | Dilution Factor:  | 1.0000   |
| Recording Time:  | 3/31/2011 11:01                          | Sample Weight:    | 1.0000   |
| Run Time (min):  | 112.54                                   | Sample Amount:    | 1.0000   |

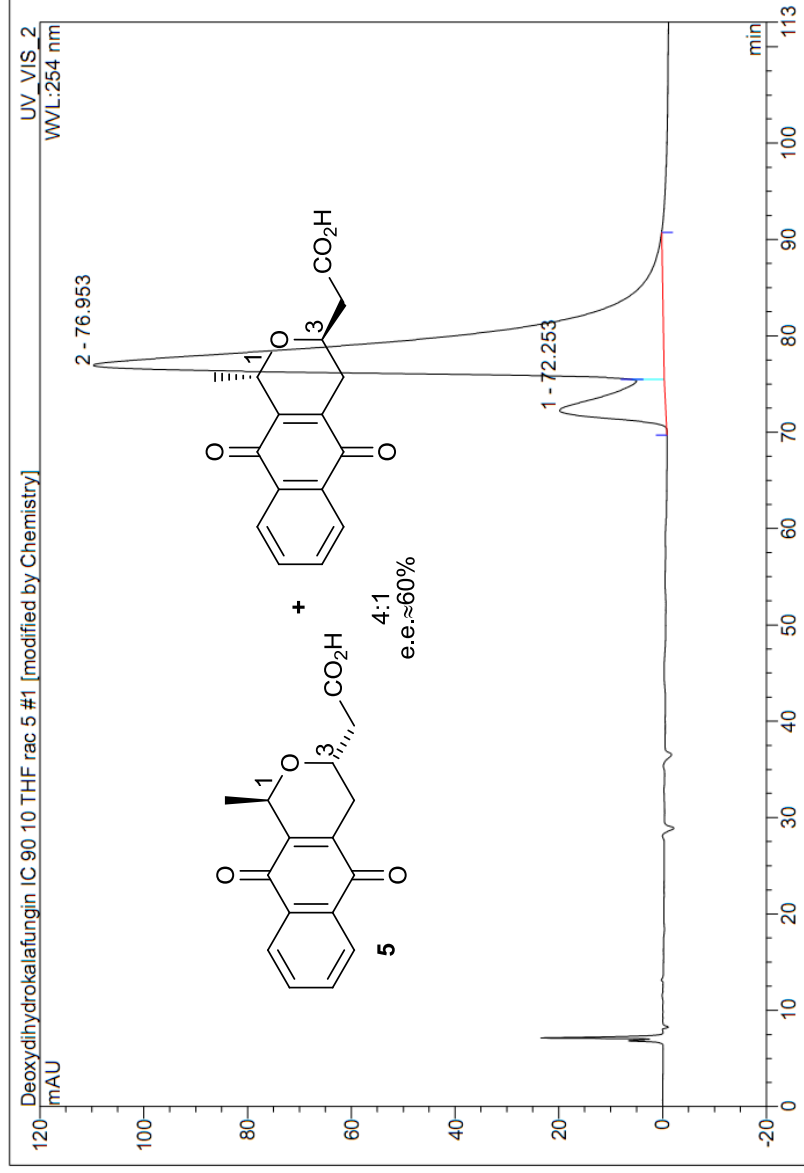

| No.           | Ret.Time min | Peak Name | Height mAU | Area mAU*min | Rel.Area % | Amount | Type |
|---------------|--------------|-----------|------------|--------------|------------|--------|------|
| 1             | 72.25        | n.a.      | 20.470     | 56.335       | 12.00      | n.a.   | BM * |
| 2             | 76.95        | n.a.      | 109.956    | 413.018      | 88.00      | n.a.   | MB*  |
| <b>Total:</b> |              |           | 130.426    | 469.353      | 100.00     | 0.000  |      |

Operator:Chemistry Timebase:NP\_HPLC Sequence:Deoxydihydrokalfungin IC 90 10 THF rac chiral latest  
Page 1-1  
3/31/2011 5:37 PM

## 1 Deoxydihydrokalfungin IC 90 10 THF rac chiral latest

|                  |                                          |                   |          |
|------------------|------------------------------------------|-------------------|----------|
| Sample Name:     | Deoxydihydrokalfungin IC 90 10 THF rac c | Injection Volume: | 20.0     |
| Vial Number:     | 2                                        | Channel:          | UV_VIS_2 |
| Sample Type:     | unknown                                  | Wavelength:       | 254      |
| Control Program: | alcohol 65_35                            | Bandwidth:        | n.a.     |
| Quantif. Method: | default                                  | Dilution Factor:  | 1.0000   |
| Recording Time:  | 3/31/2011 14:35                          | Sample Weight:    | 1.0000   |
| Run Time (min):  | 89.28                                    | Sample Amount:    | 1.0000   |

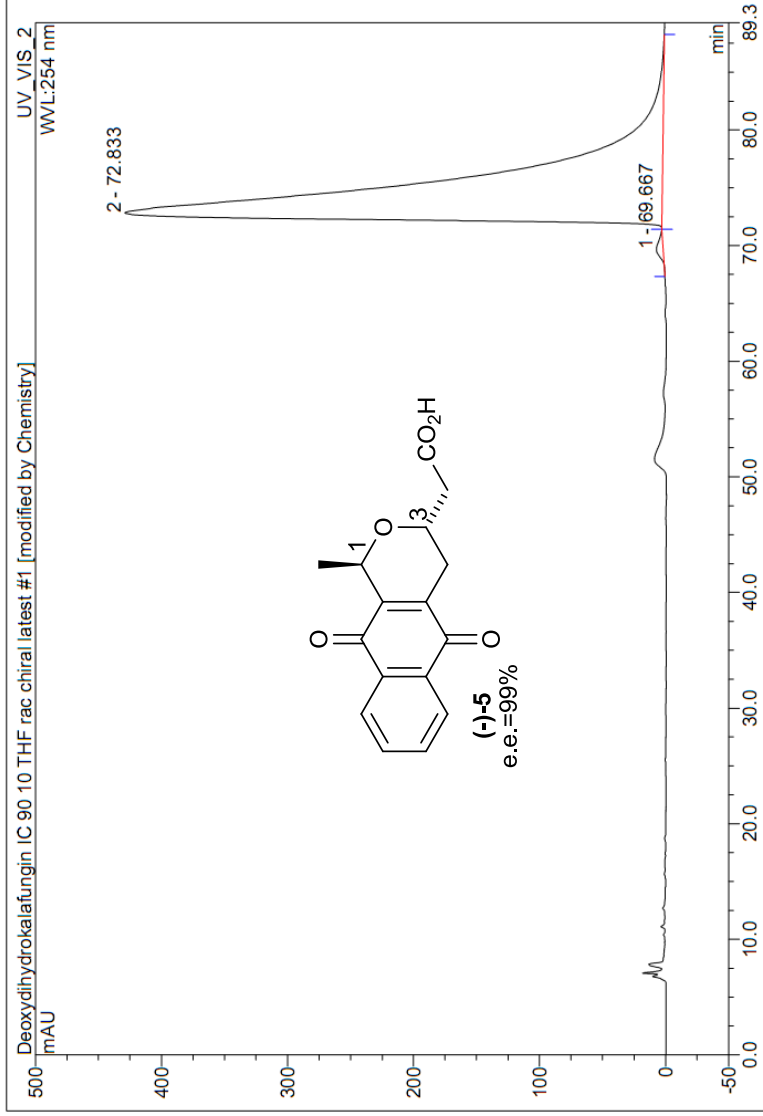

| No.           | Ret.Time min | Peak Name | Height mAU | Area mAU*min | Rel.Area % | Amount | Type |
|---------------|--------------|-----------|------------|--------------|------------|--------|------|
| 1             | 69.67        | n.a.      | 5.266      | 8.214        | 0.55       | n.a.   | BMB* |
| 2             | 72.83        | n.a.      | 426.188    | 1478.830     | 99.45      | n.a.   | bMB* |
| <b>Total:</b> |              |           | 431.454    | 1487.044     | 100.00     | 0.000  |      |

default/Integration

Chromleon (c) Dionex 1996-2006  
Version 6.80 SR5 Build 2413 (137116)
